# Supplementary figures and images for: Disentangling time series between brain tissues improves fMRI data quality using a time-dependent deep neural network
Source: PubMed Central journal article supplement — Neuroimage. Author manuscript; Available in PMC 2021 Jan 8. (PMC7792822; doi:10.1016/j.neuroimage.2020.117340), 2020-09-06

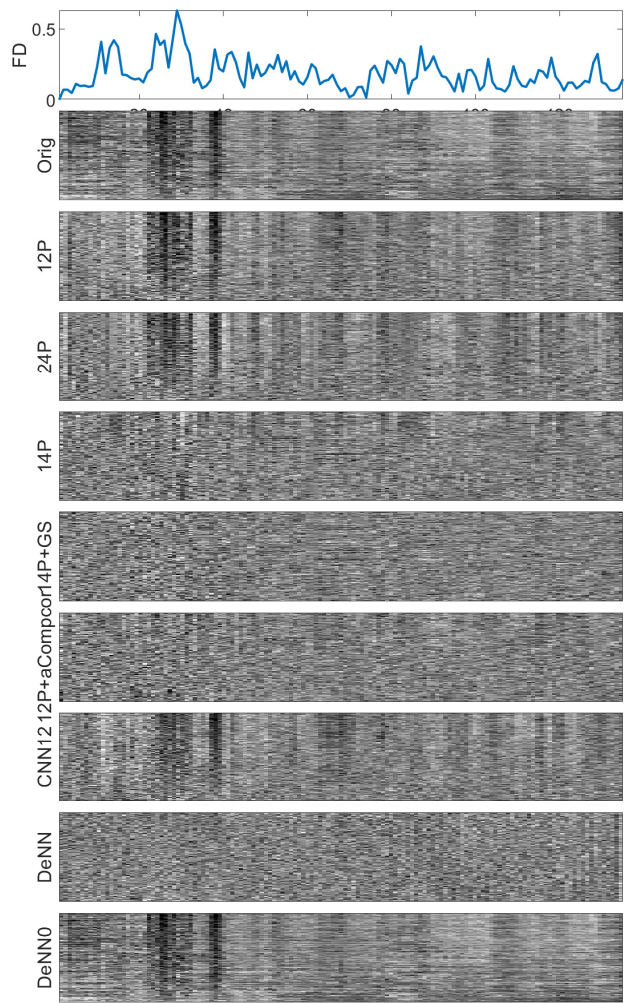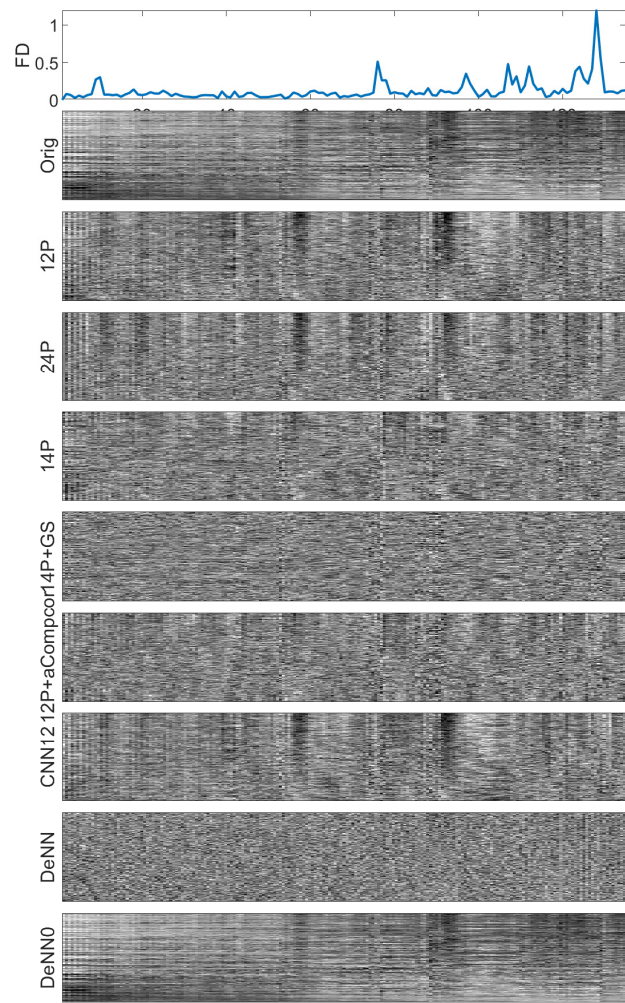

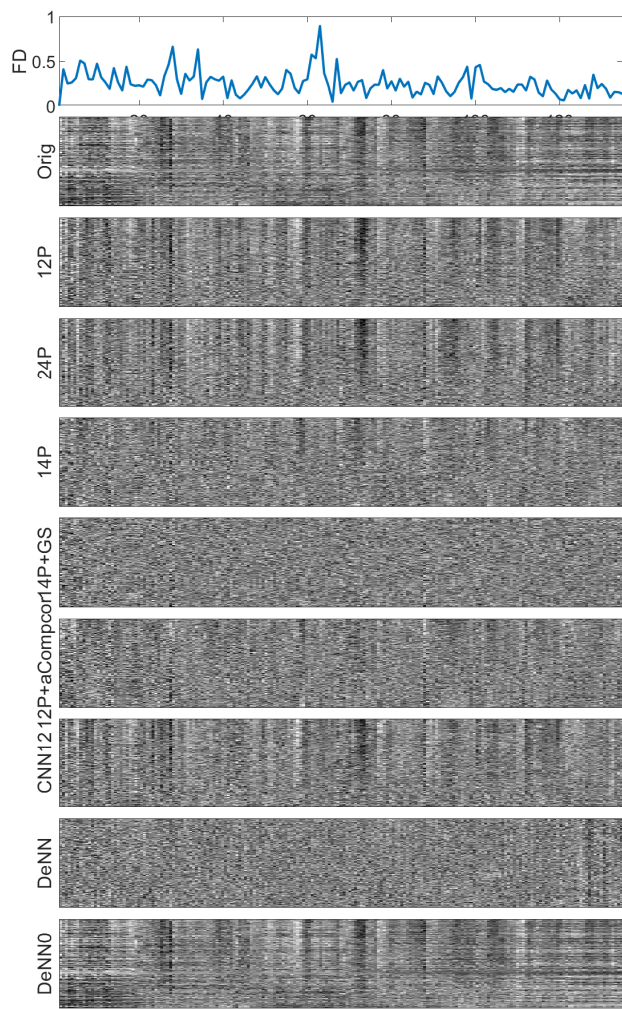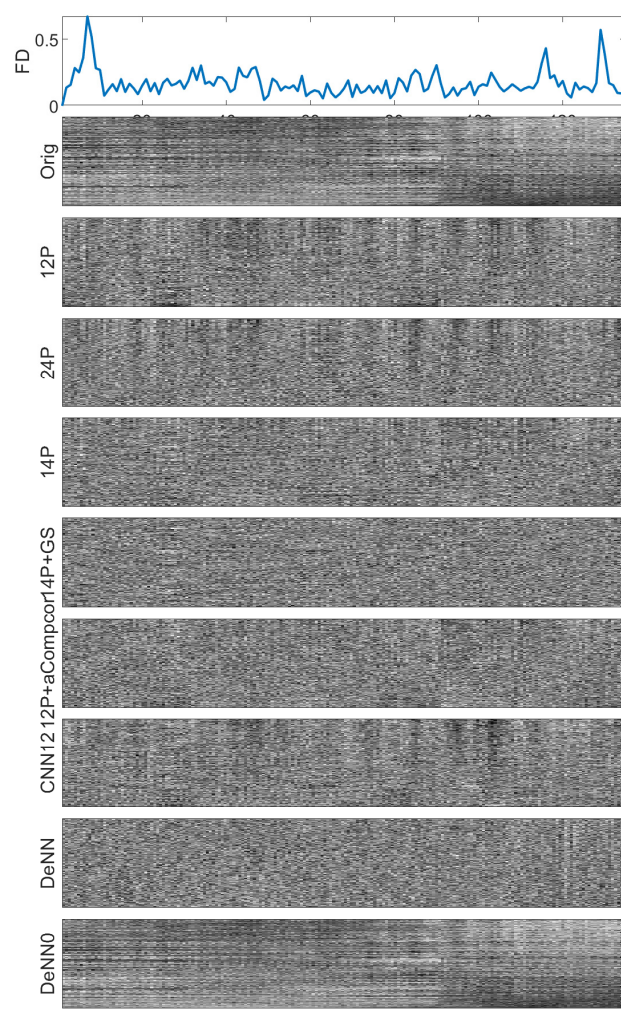



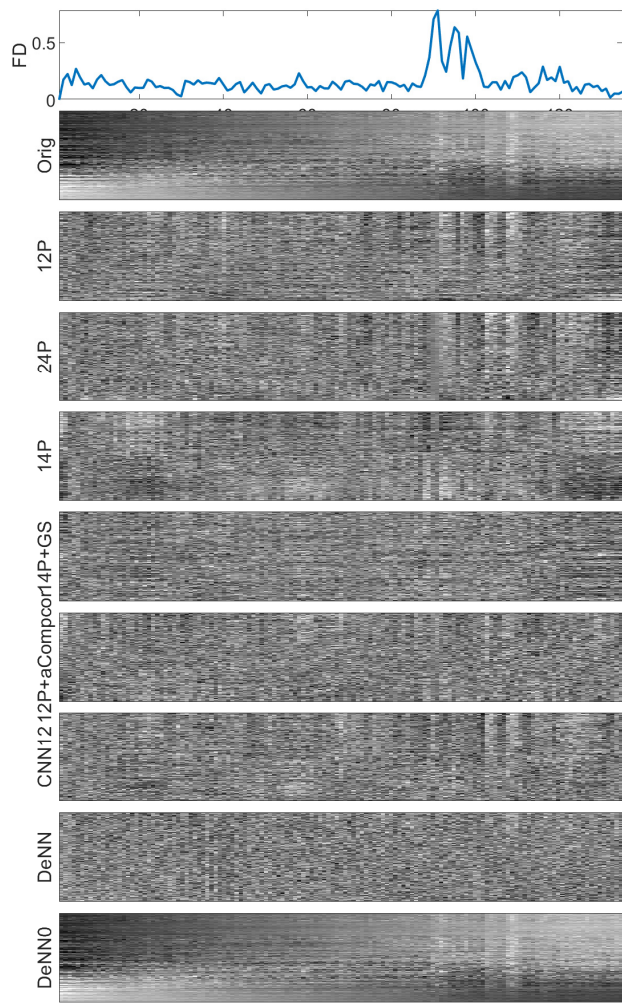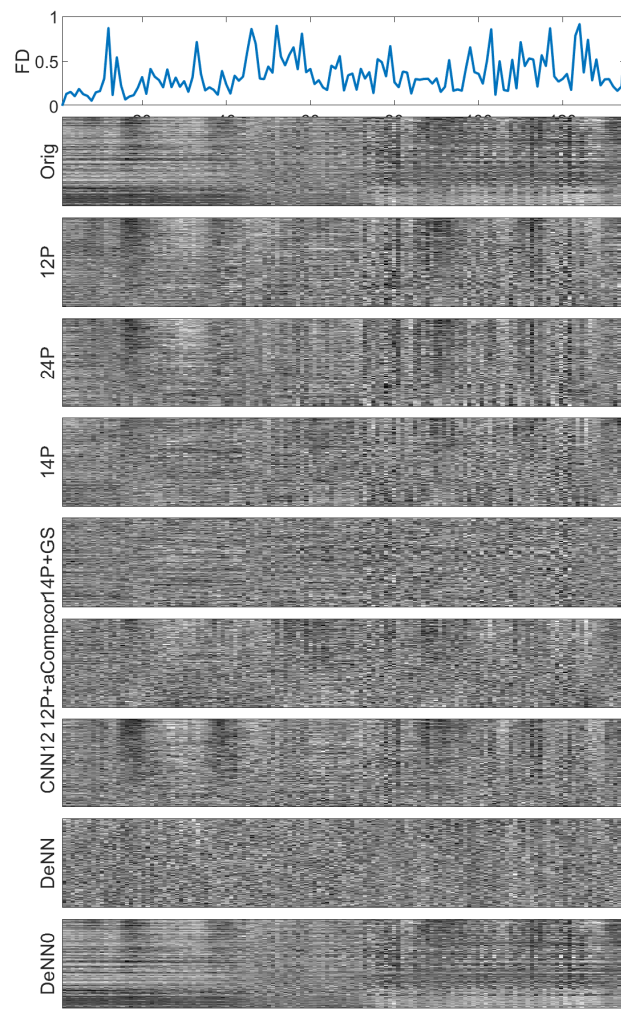

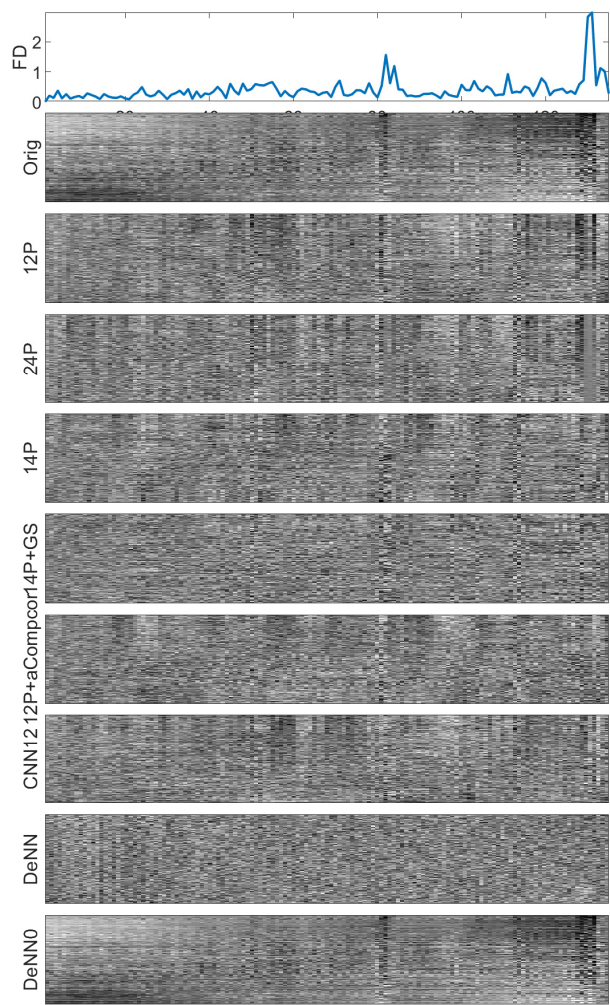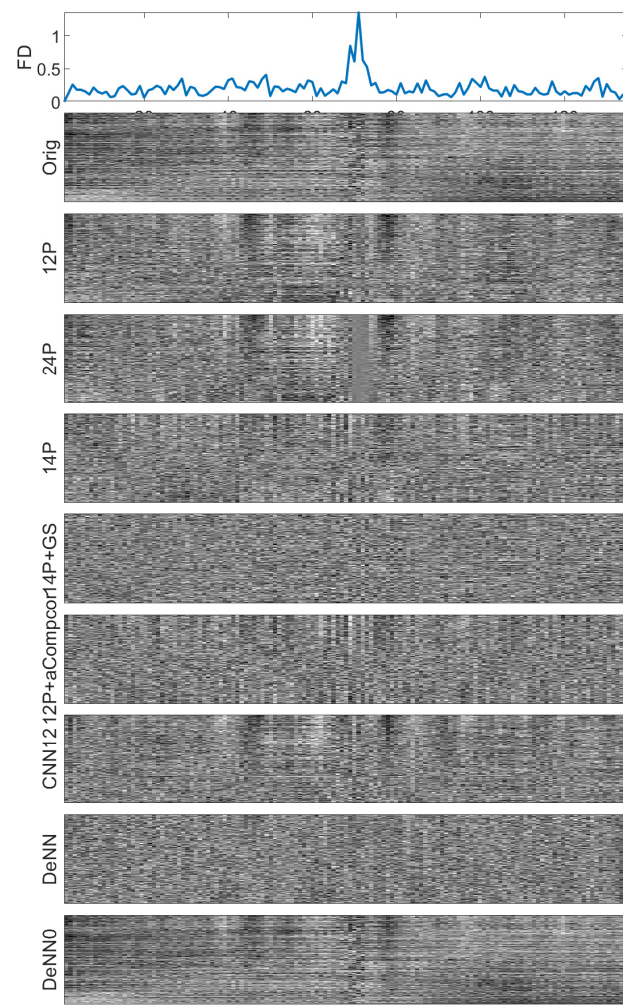

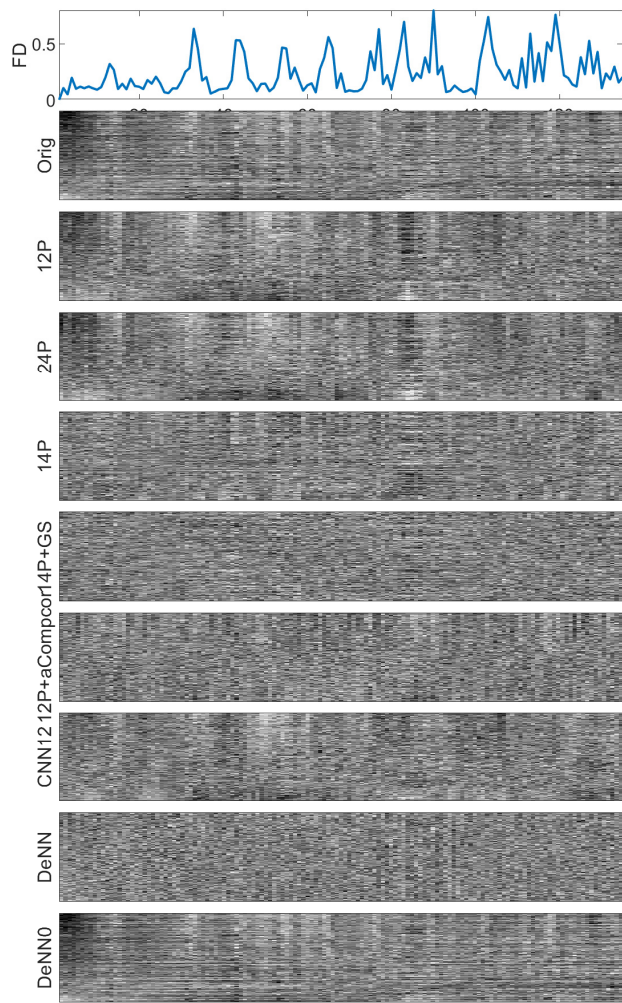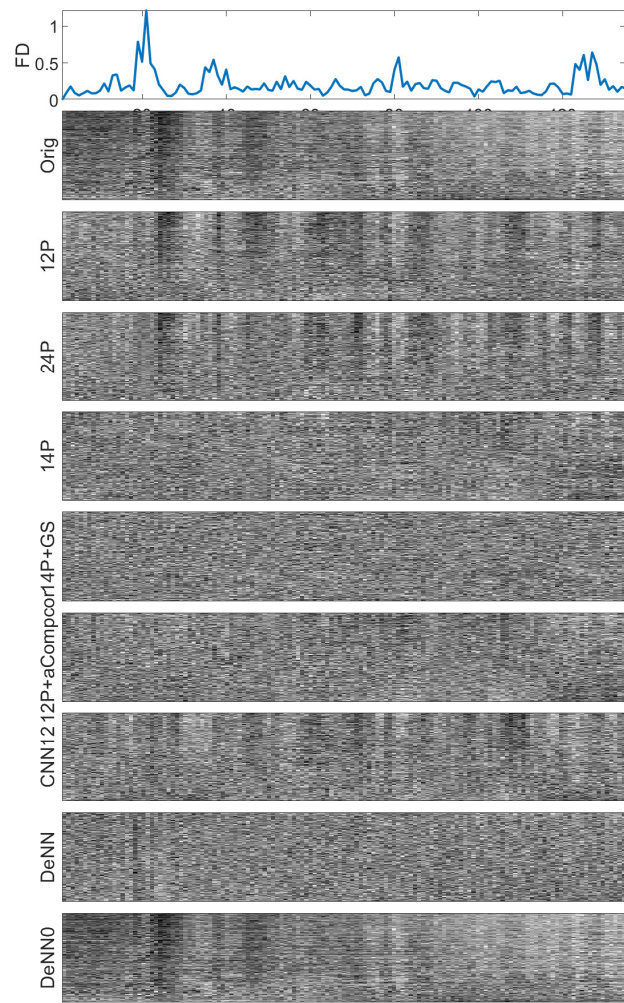



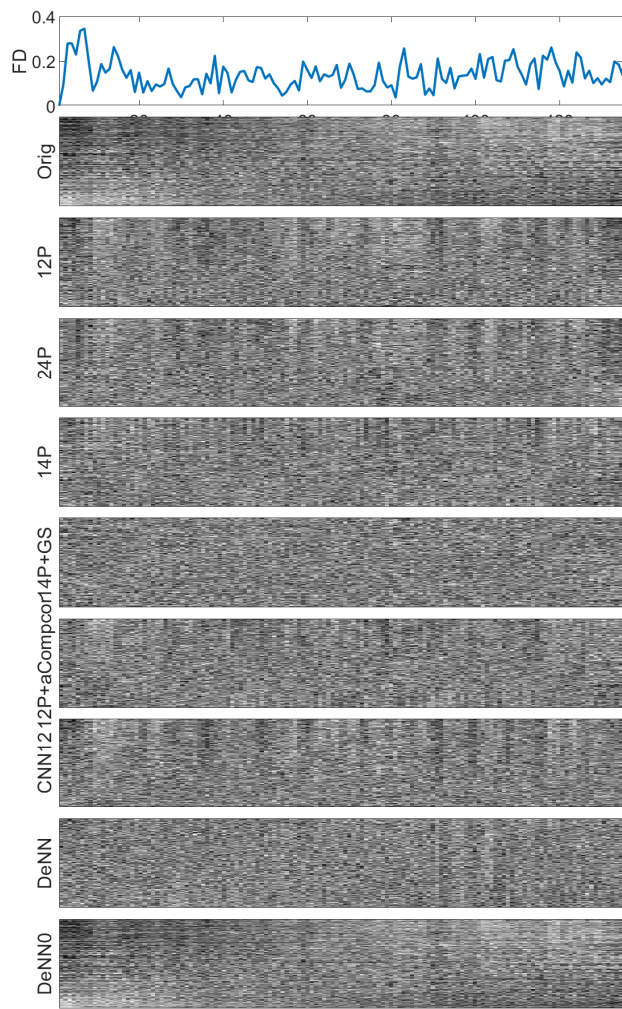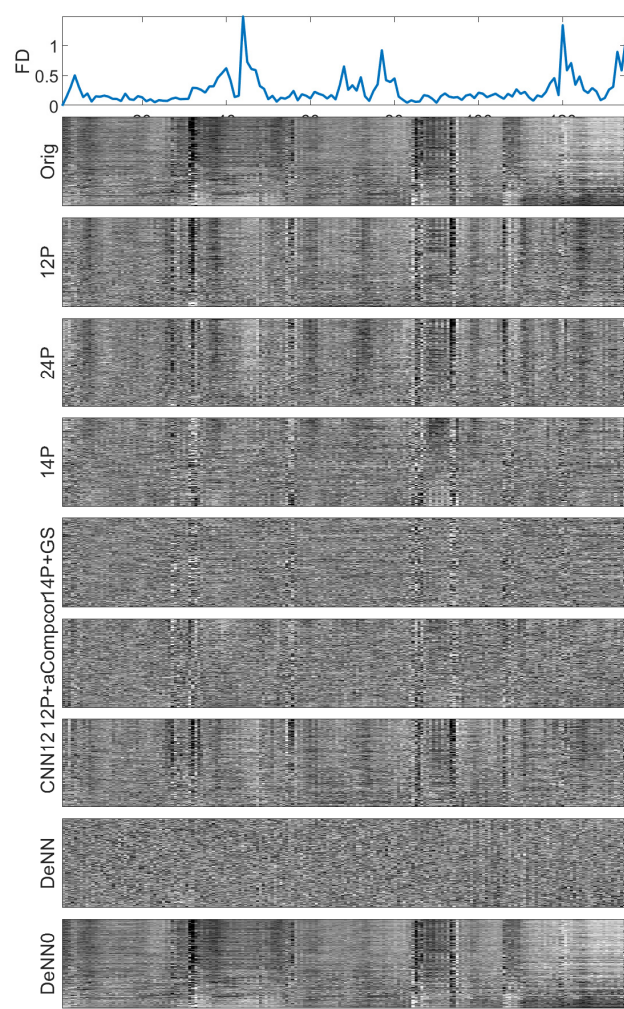

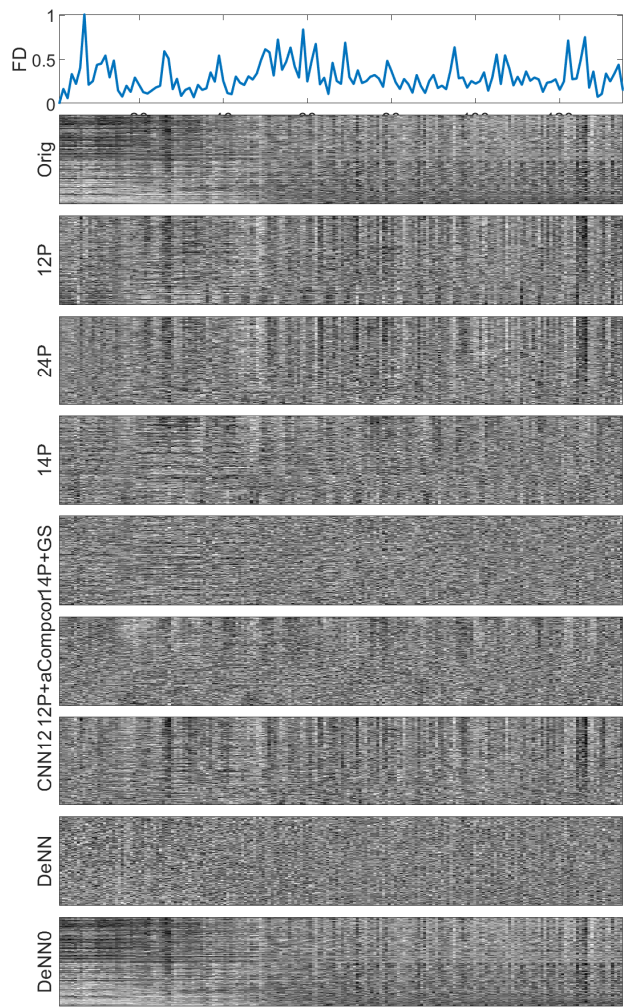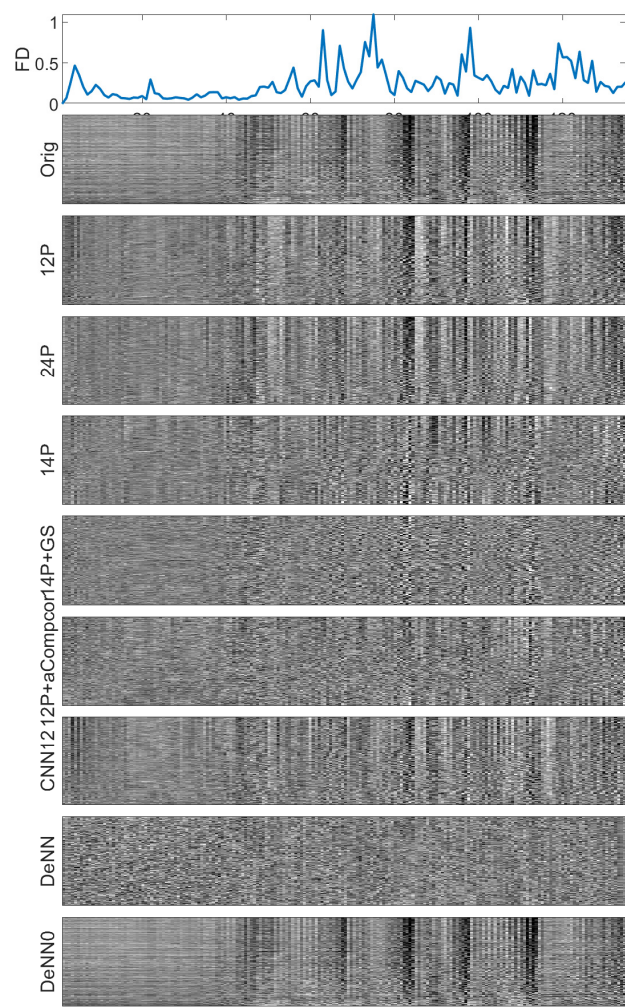

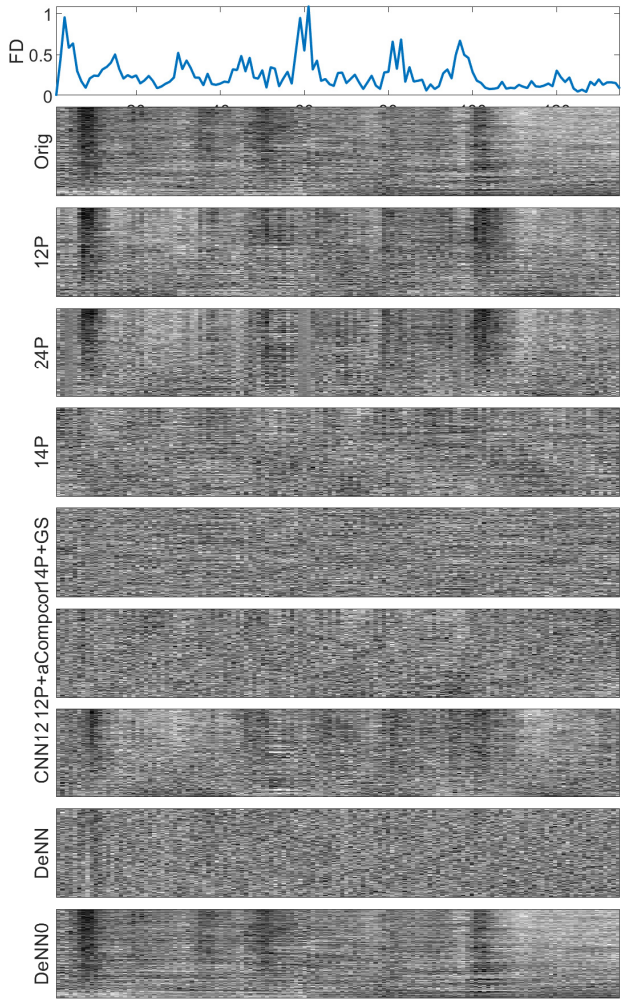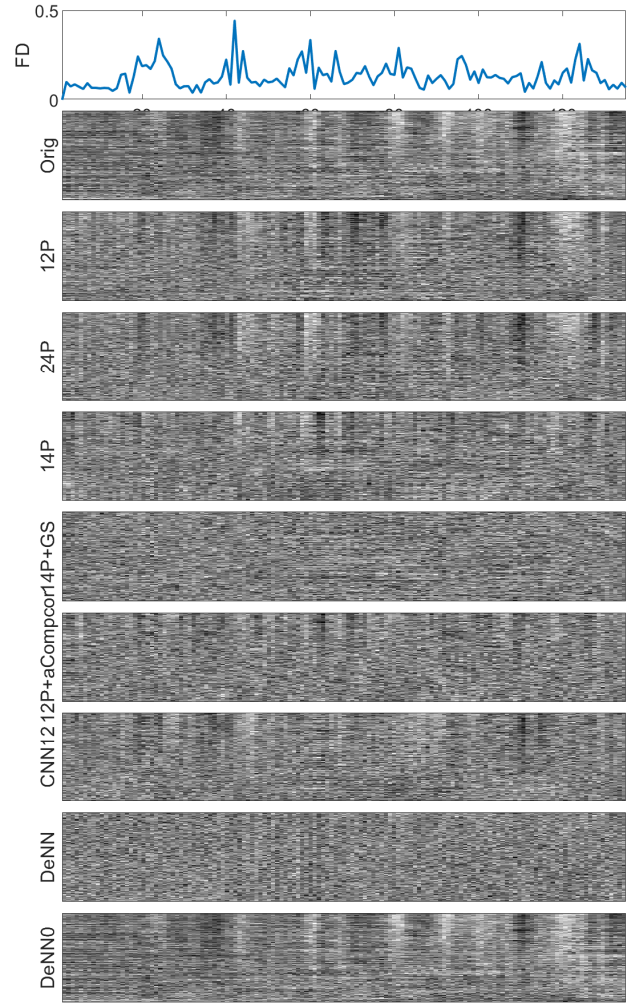



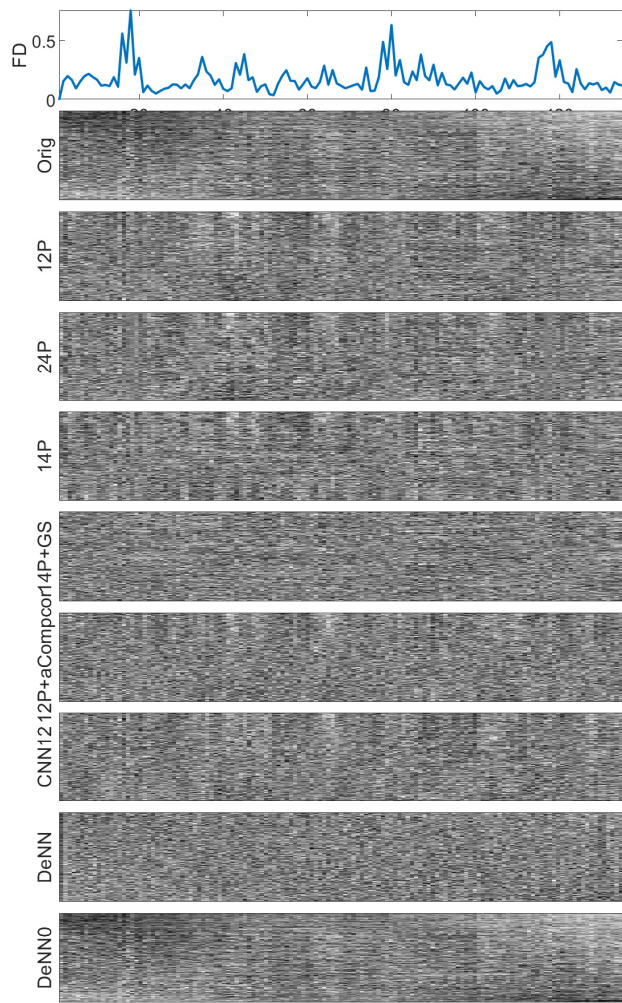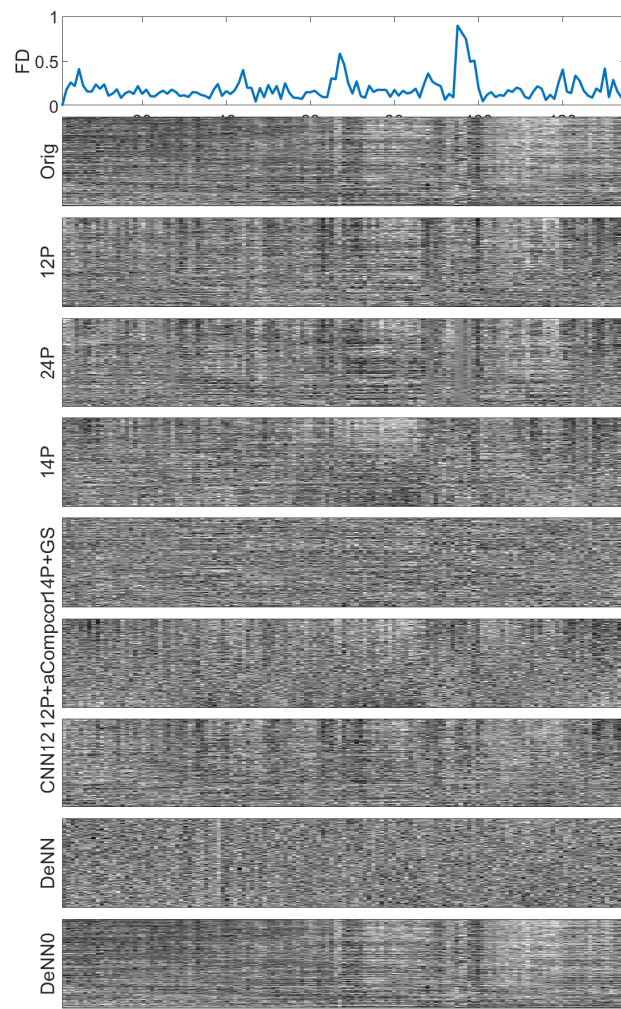

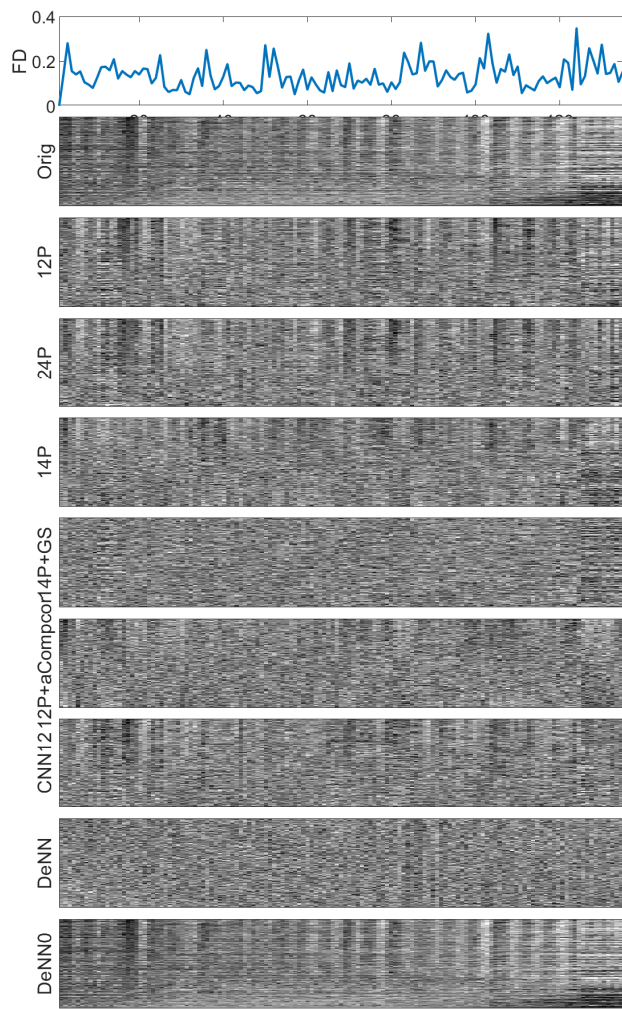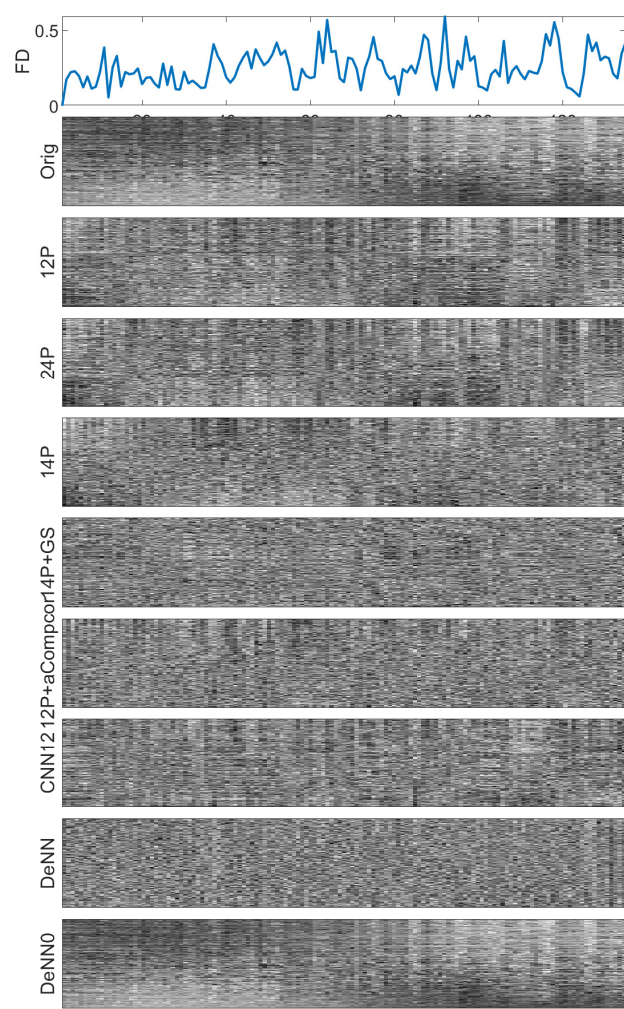

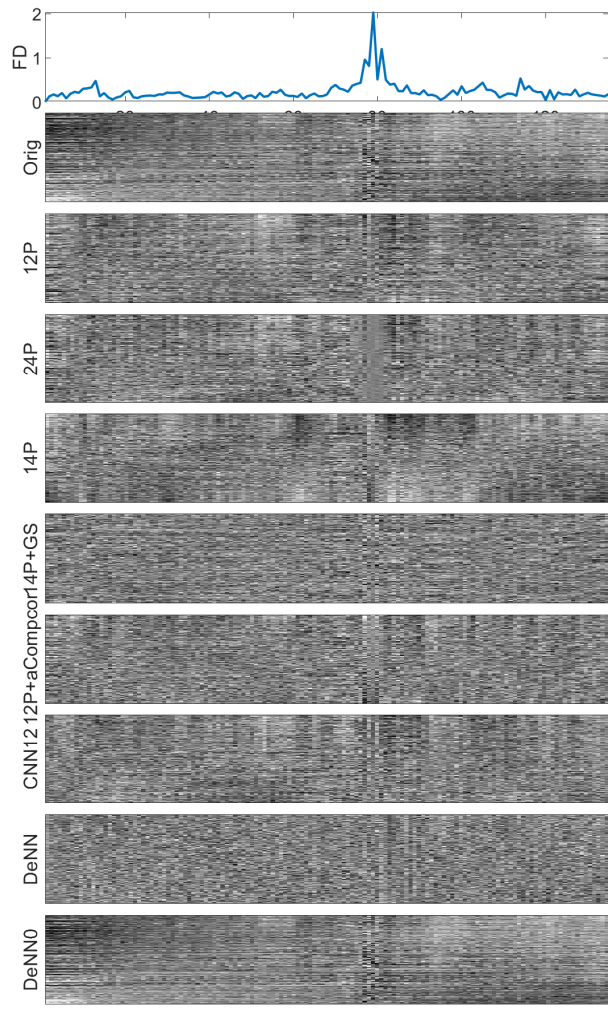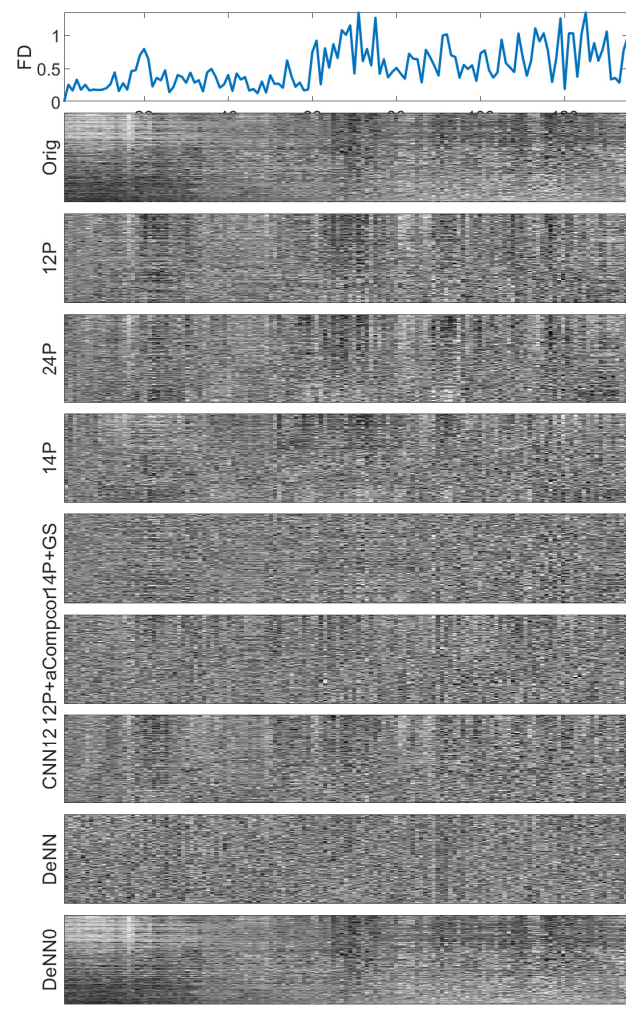



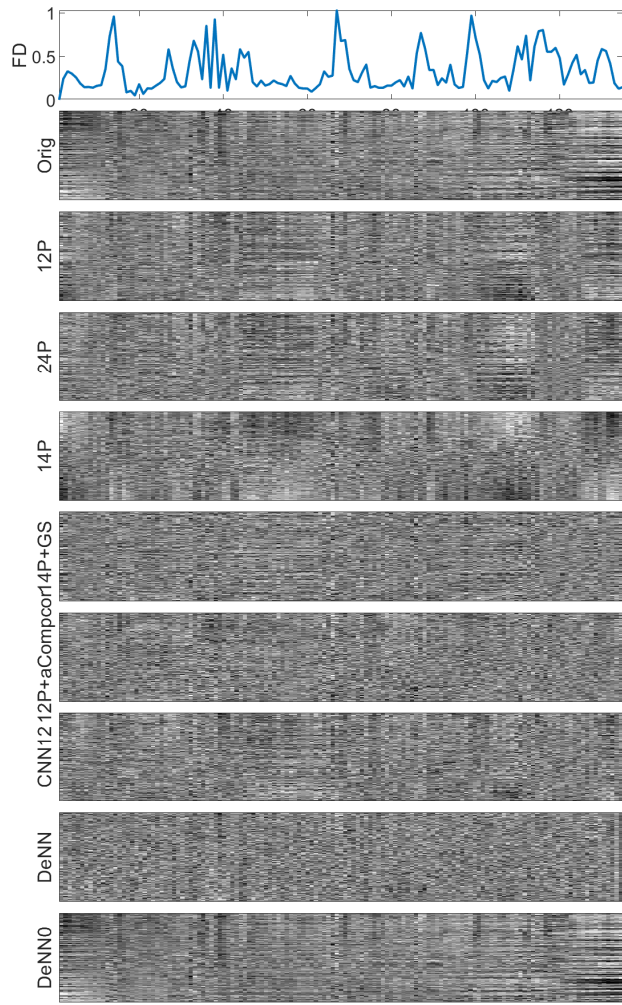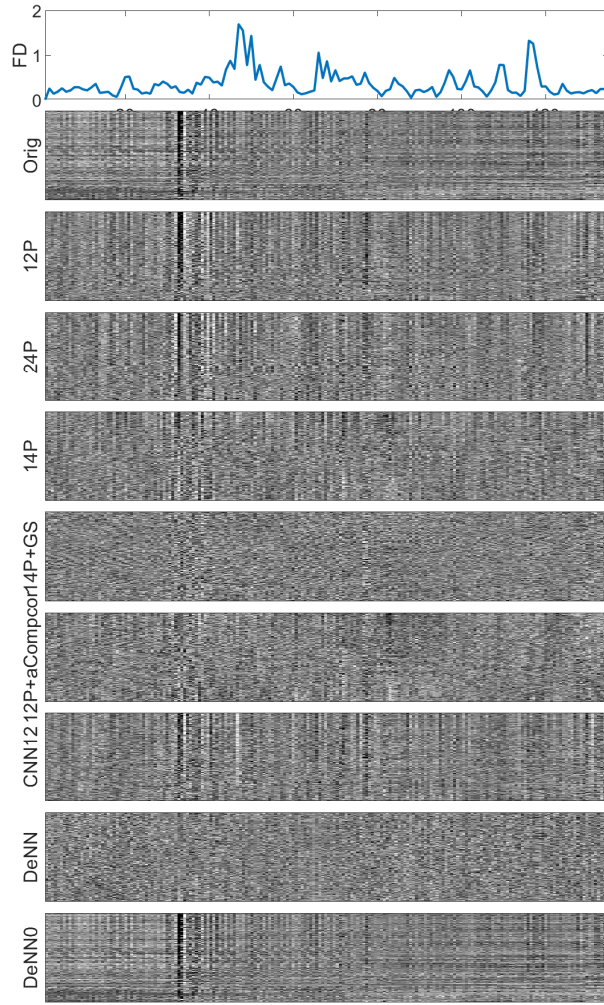

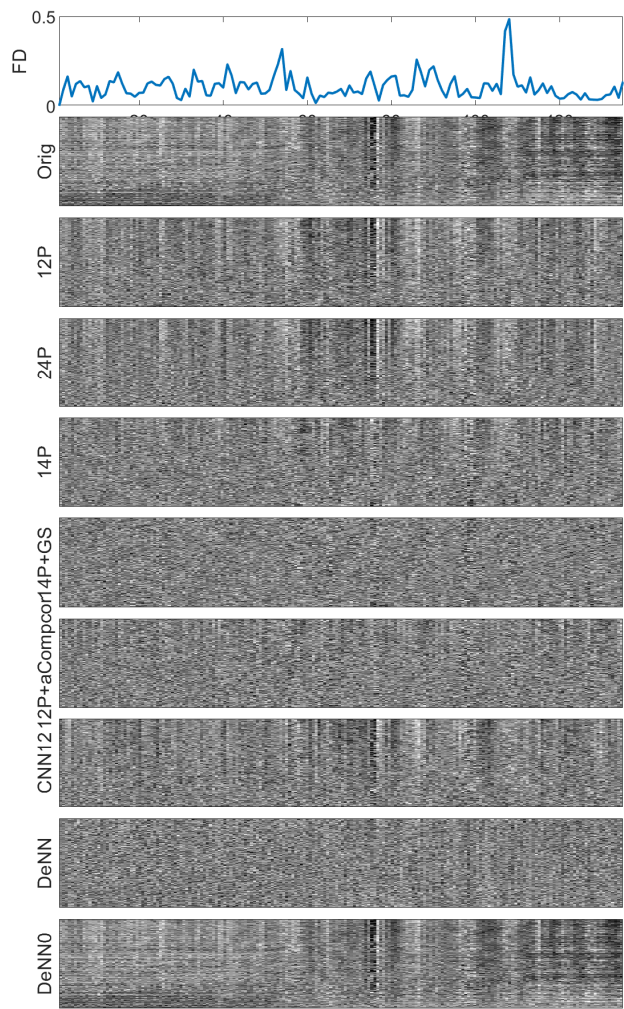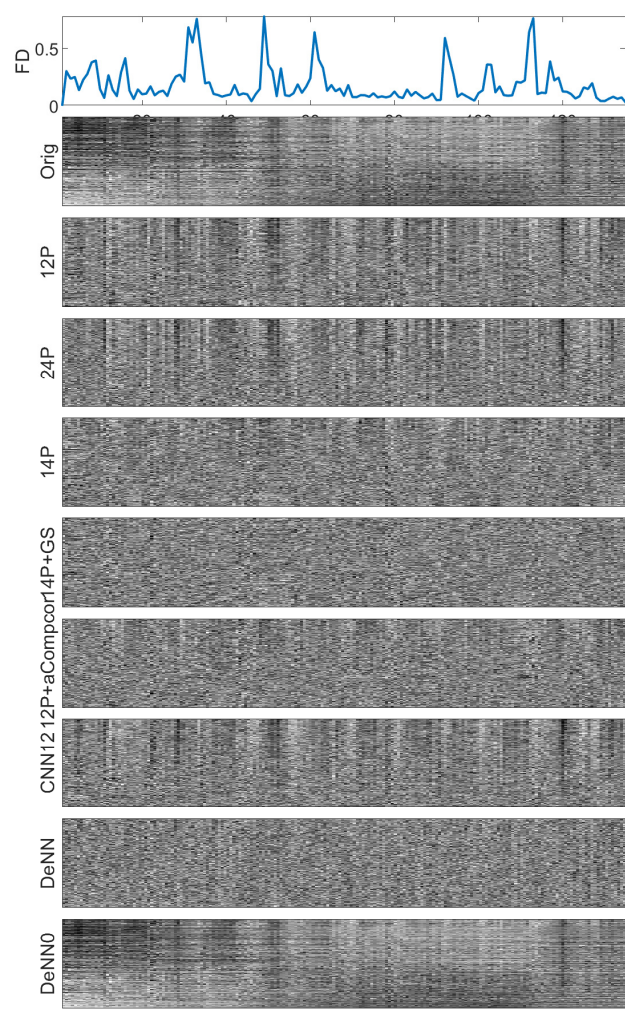

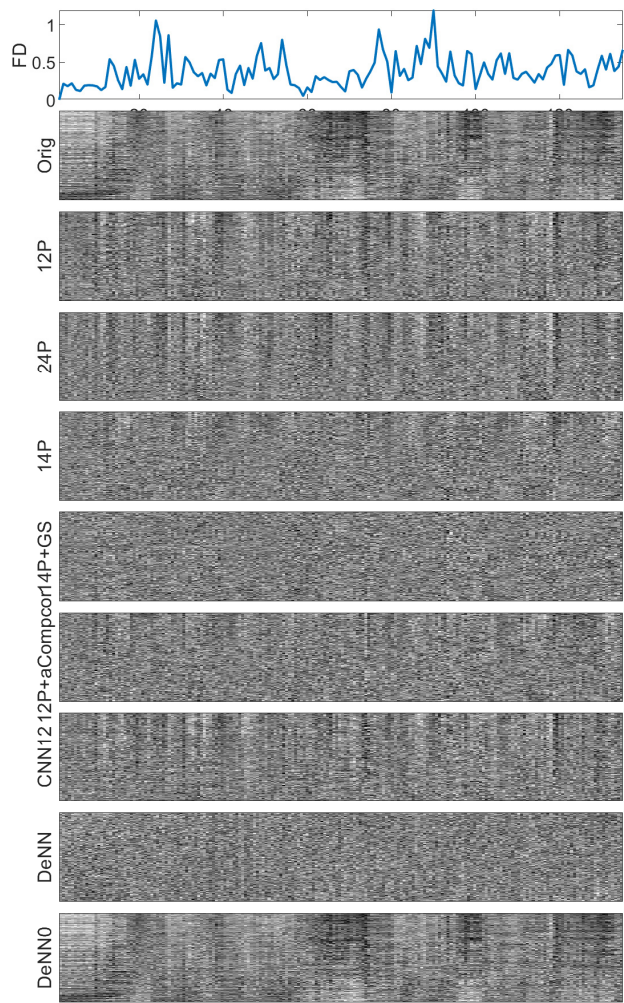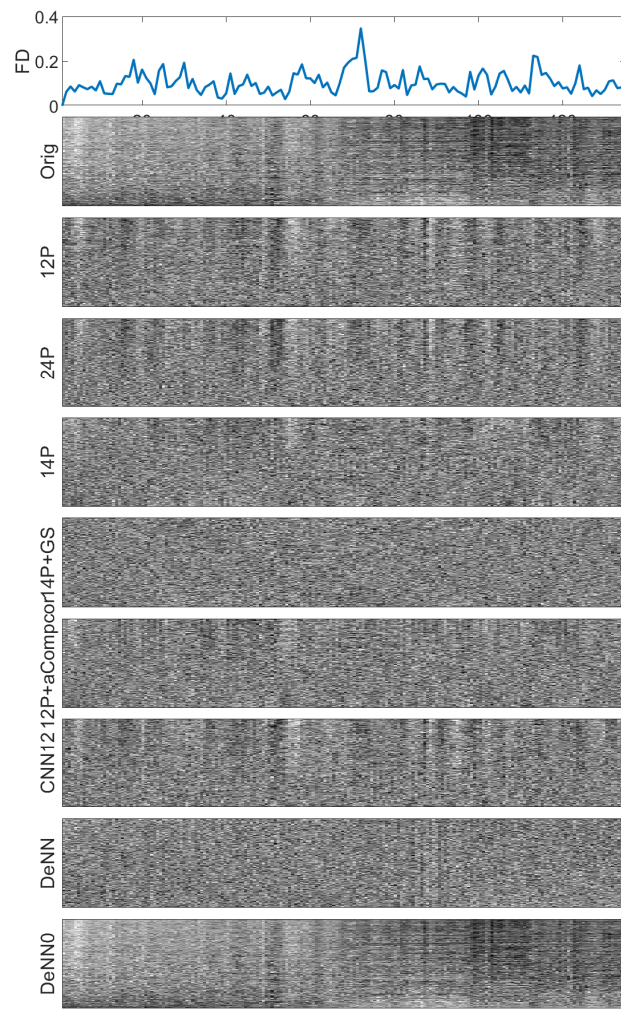



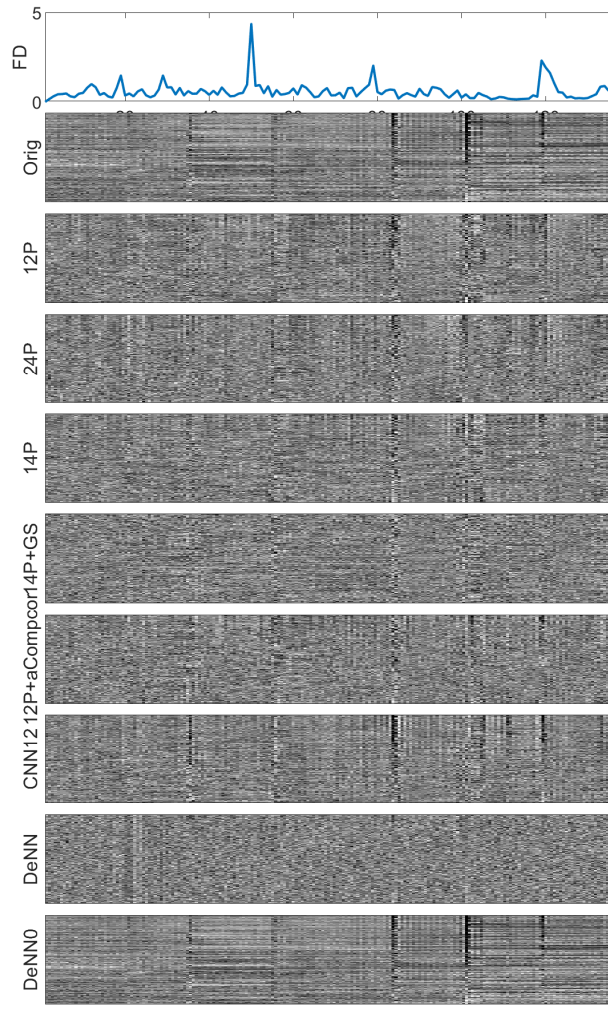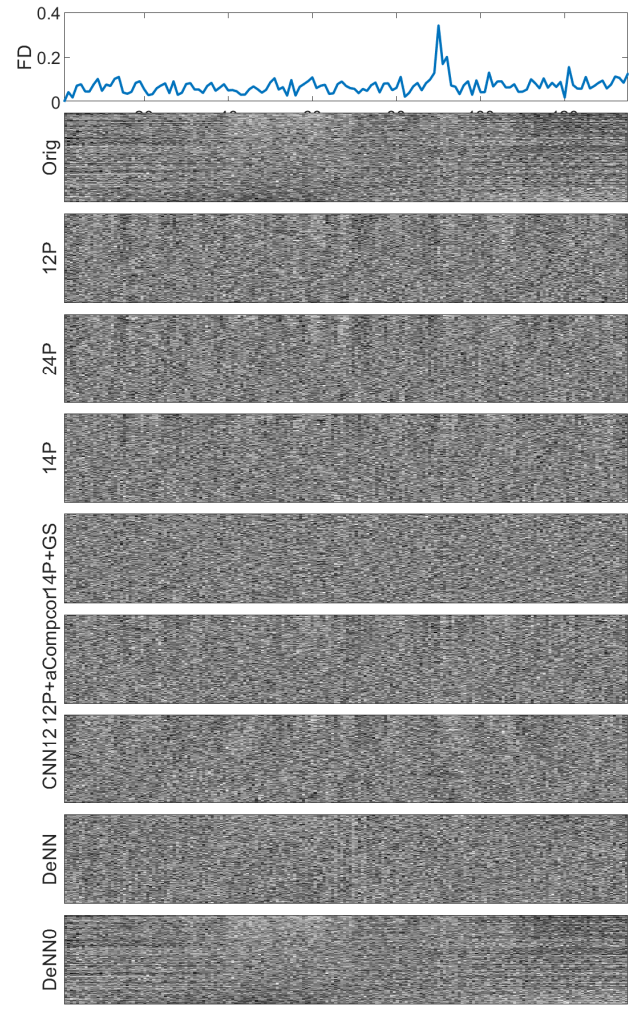

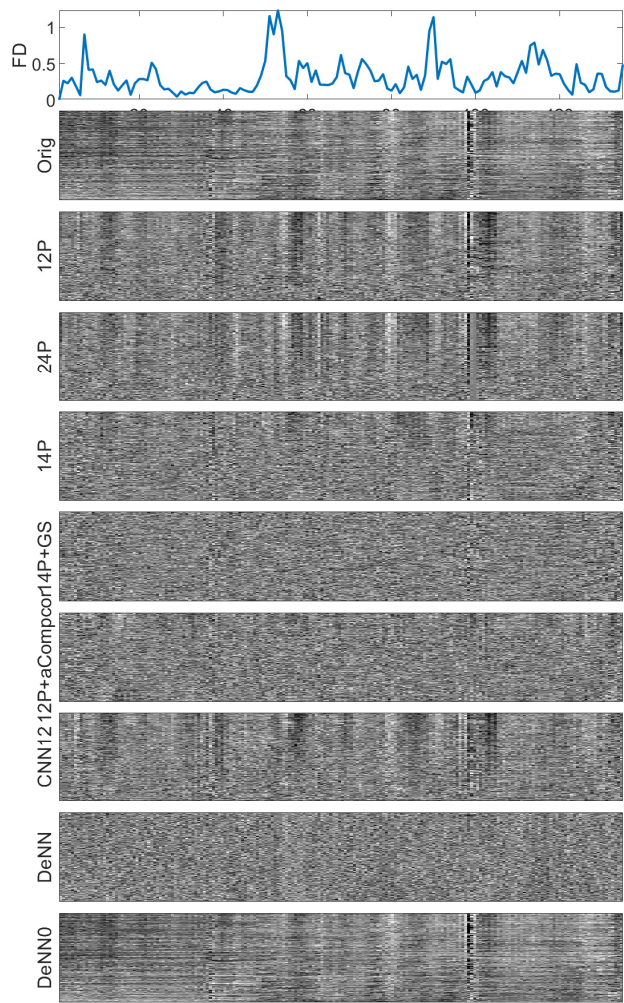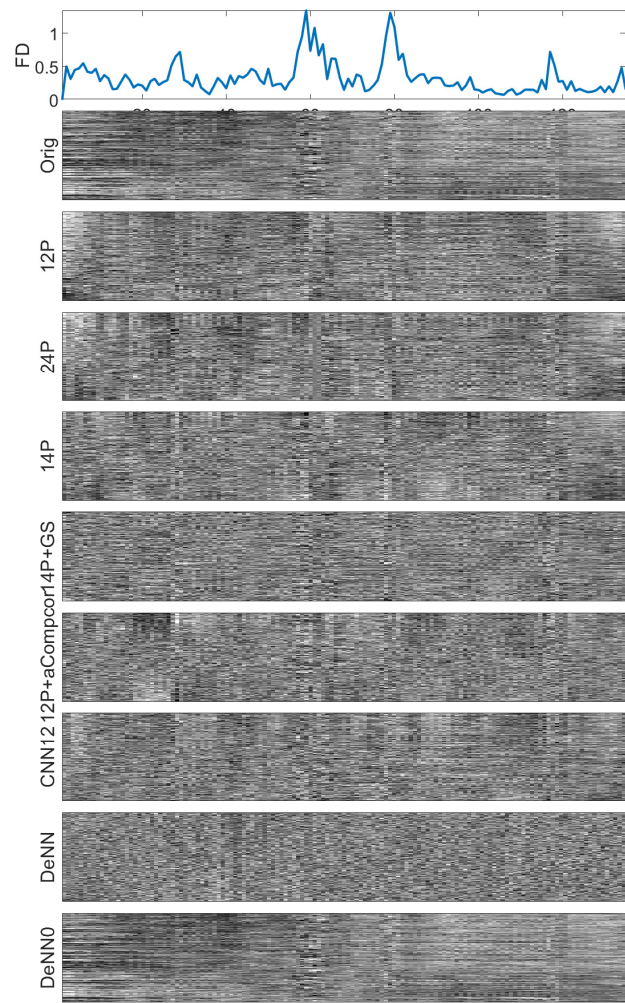

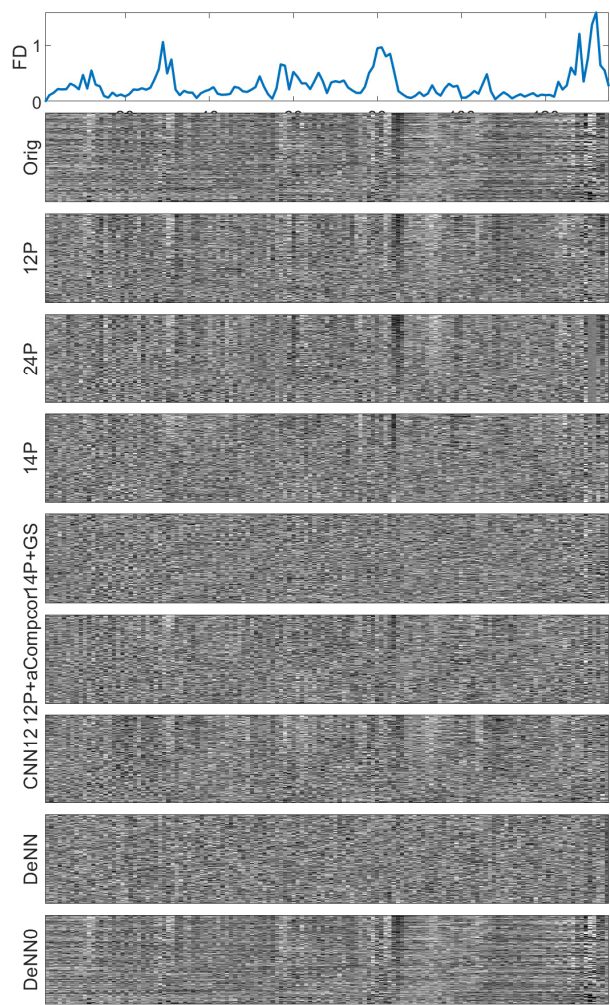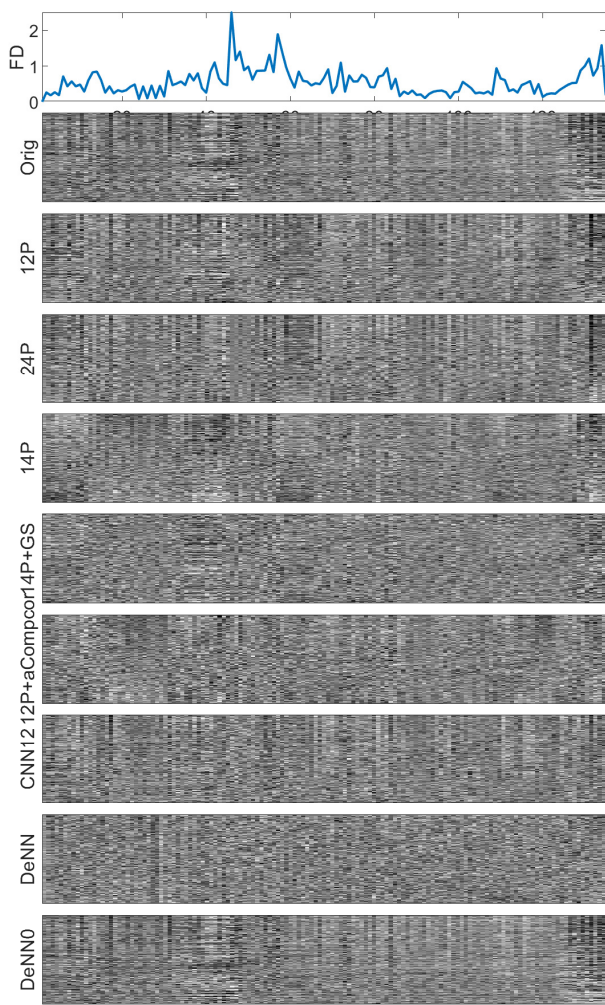



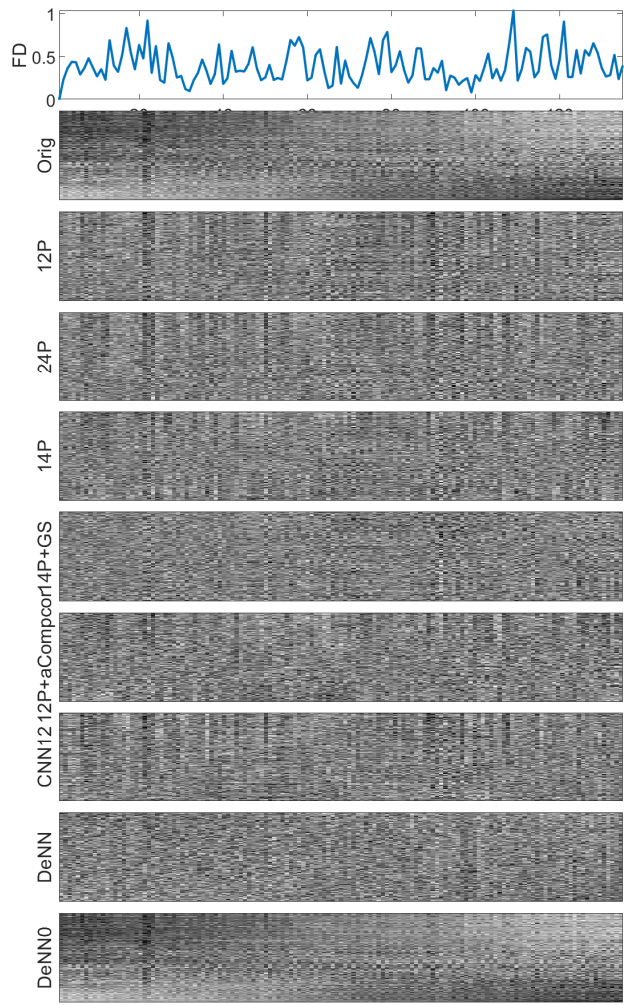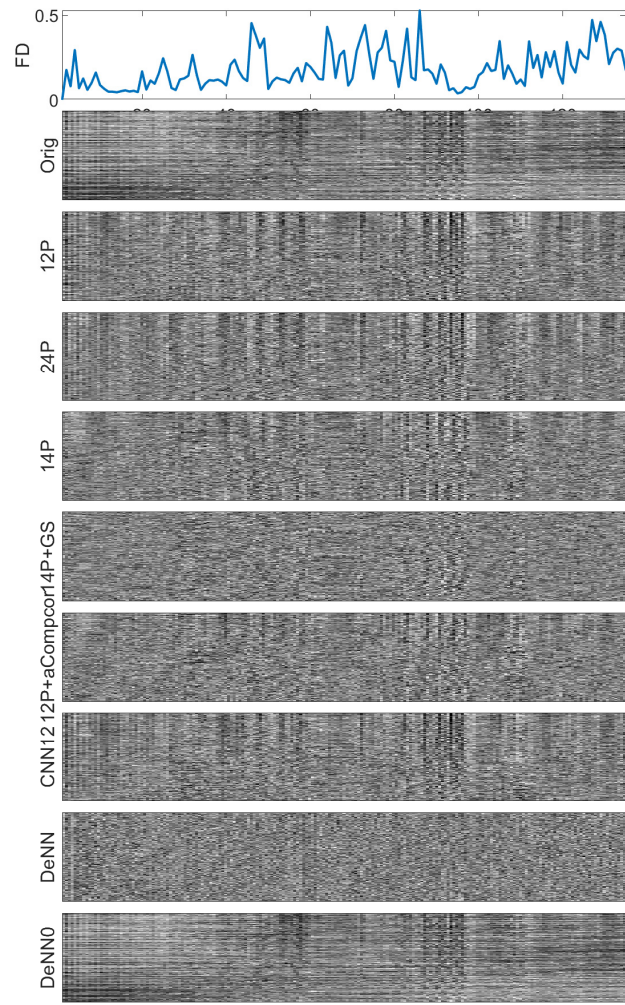

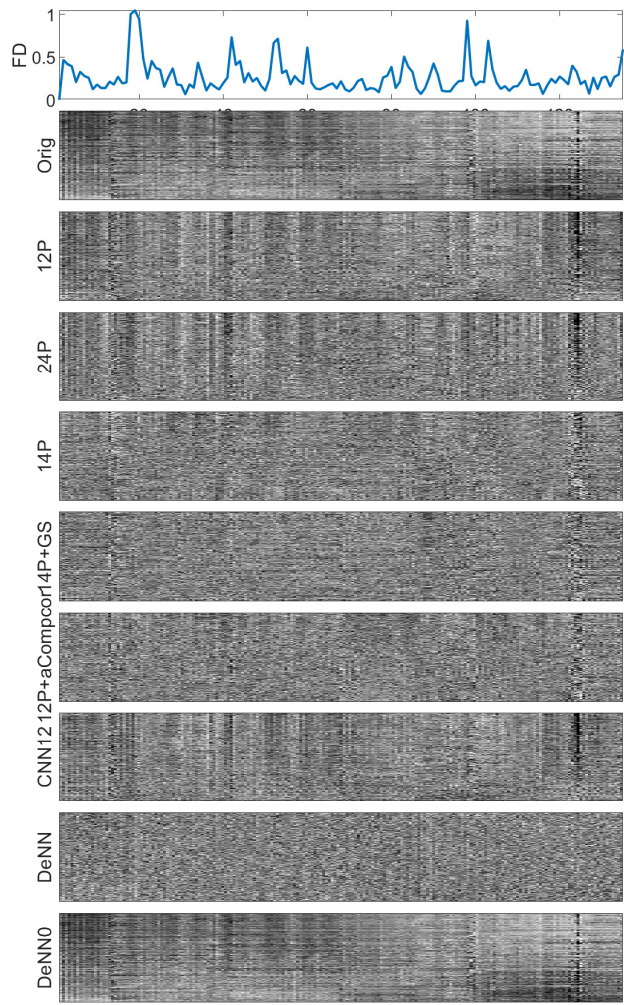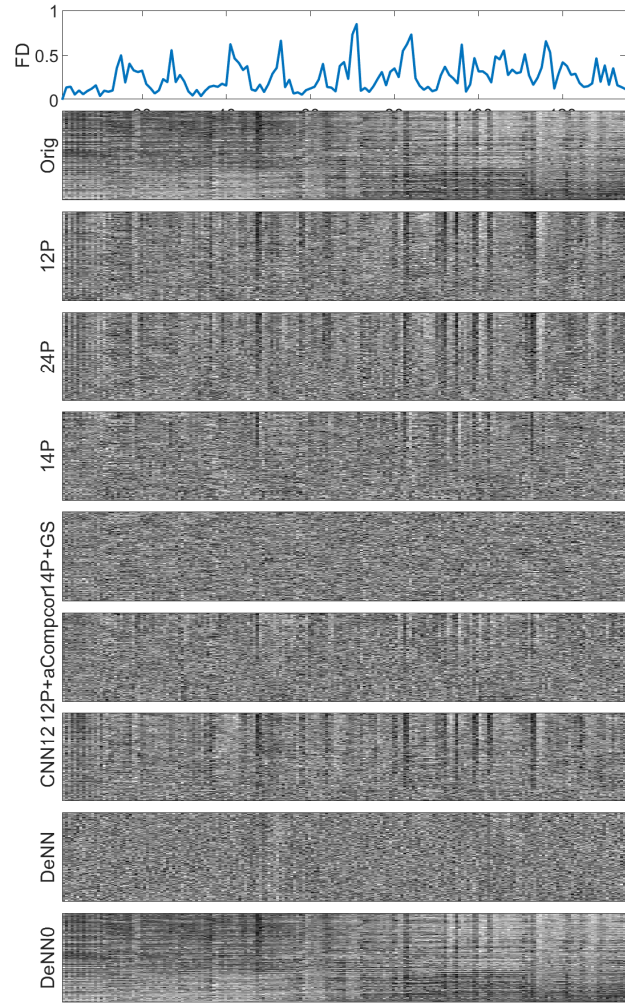

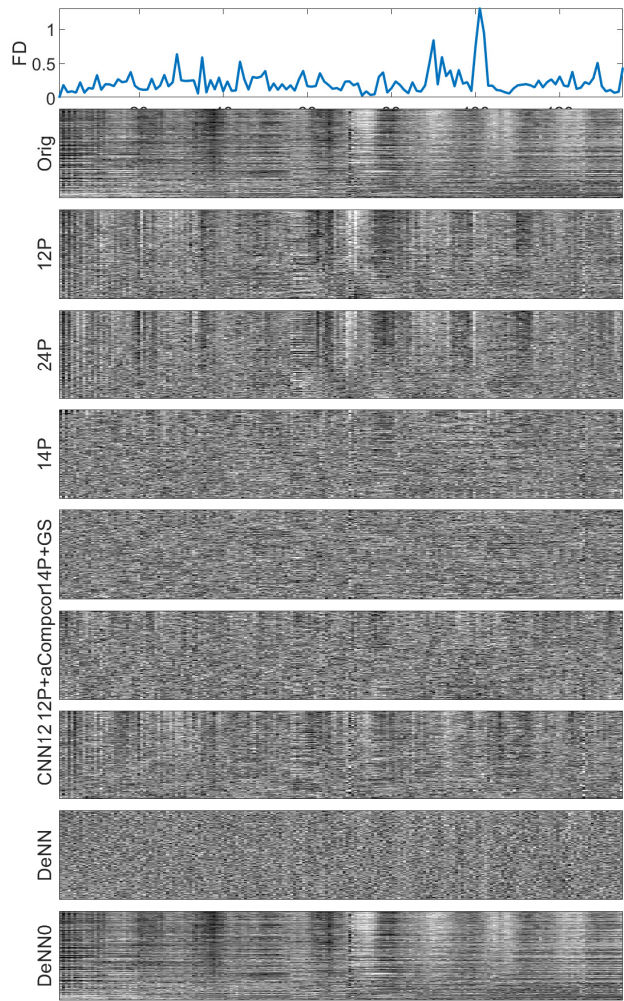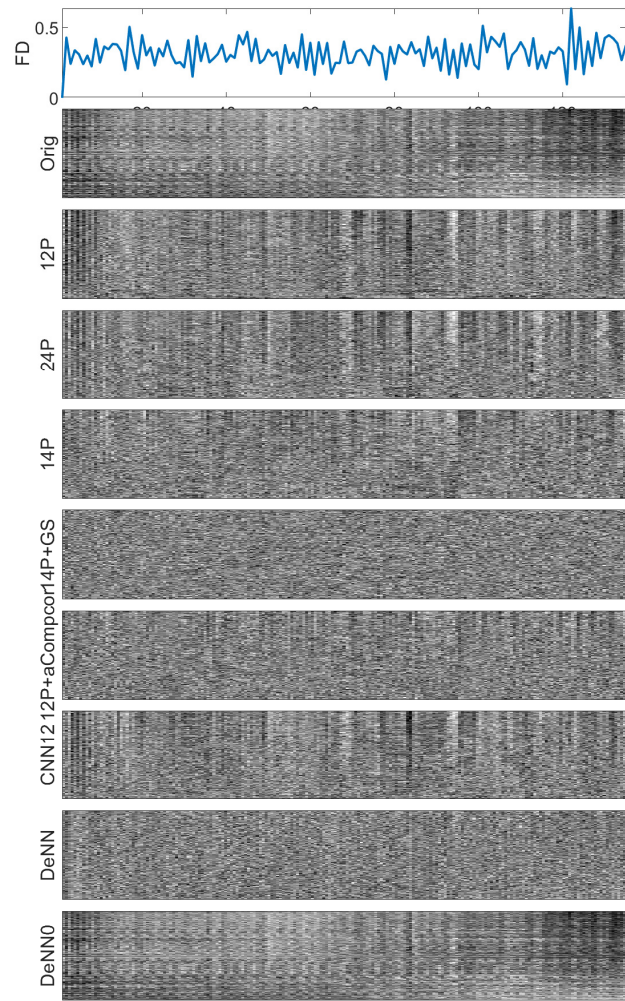



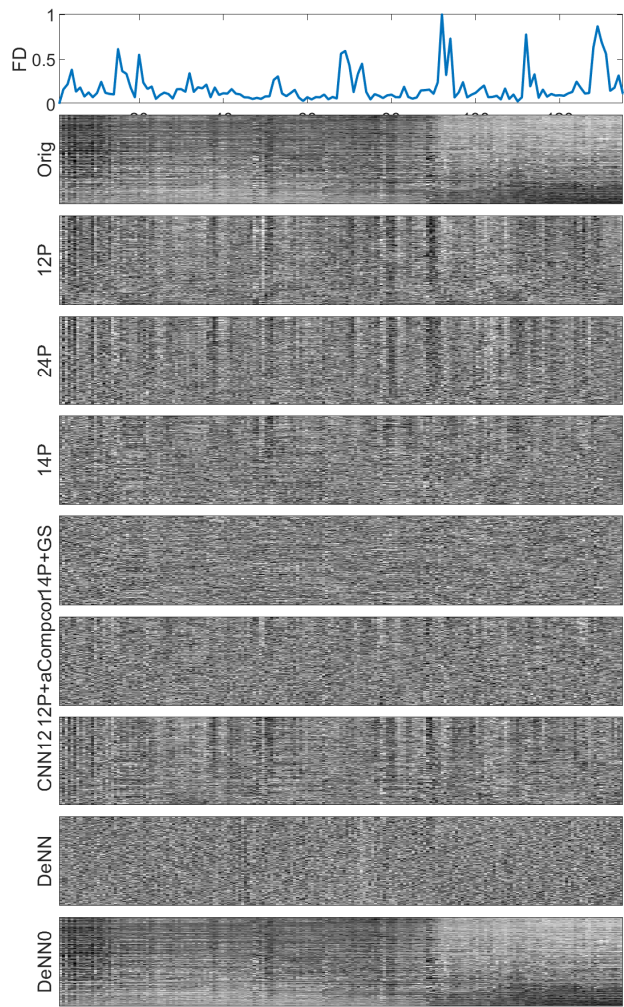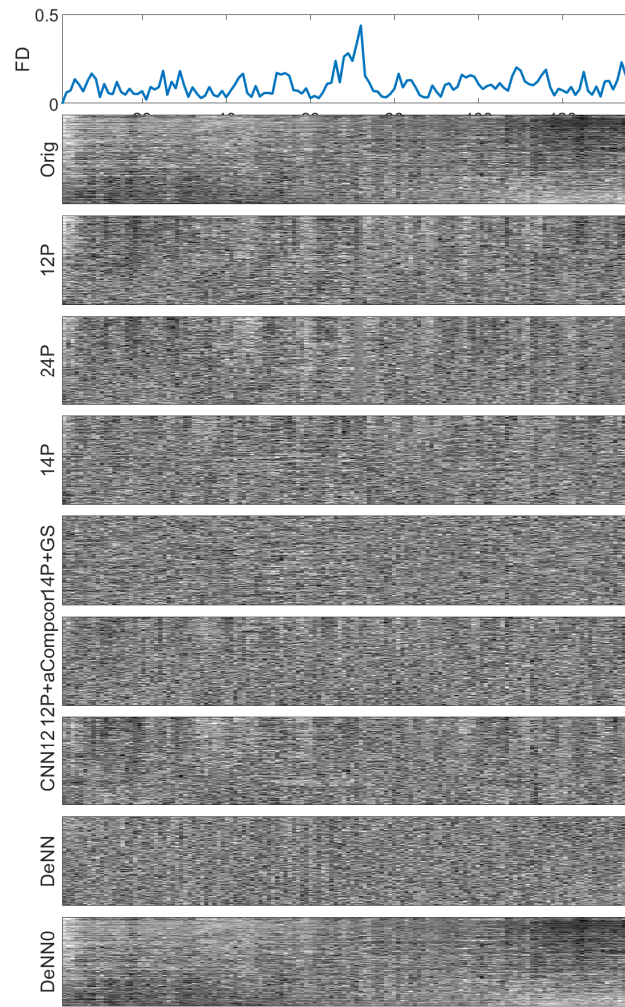

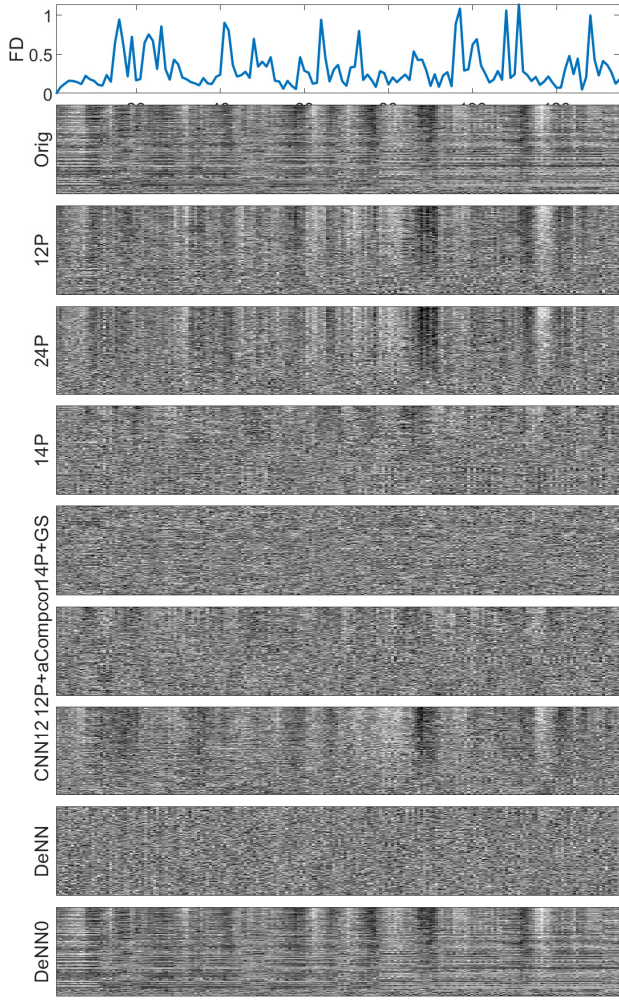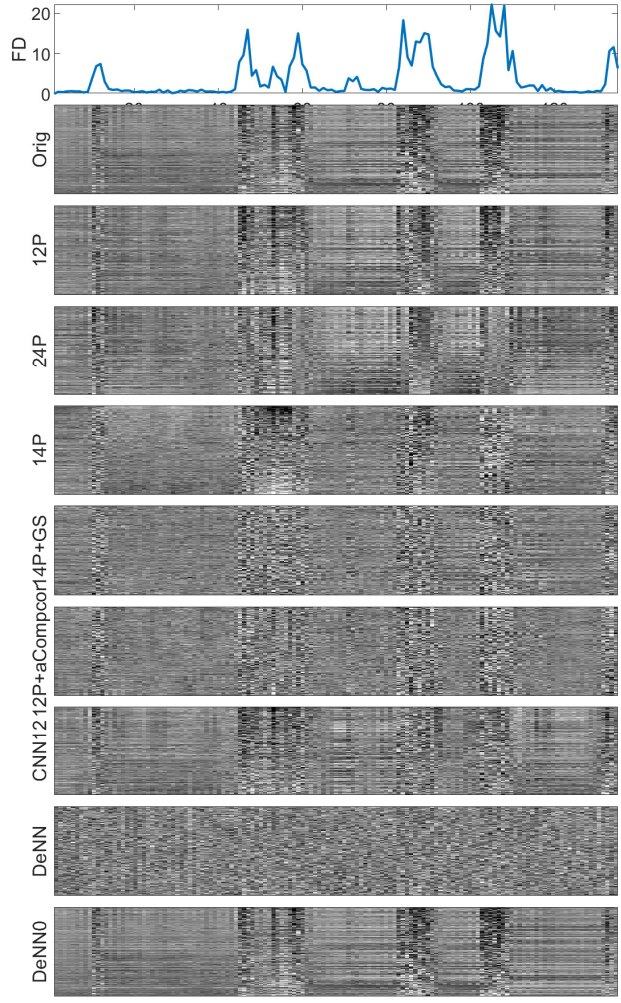

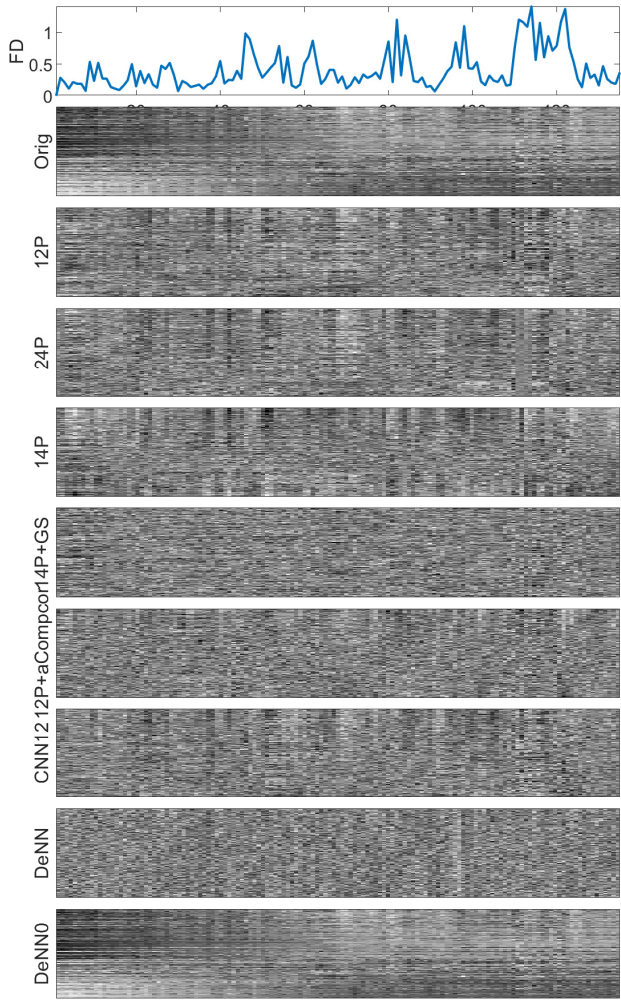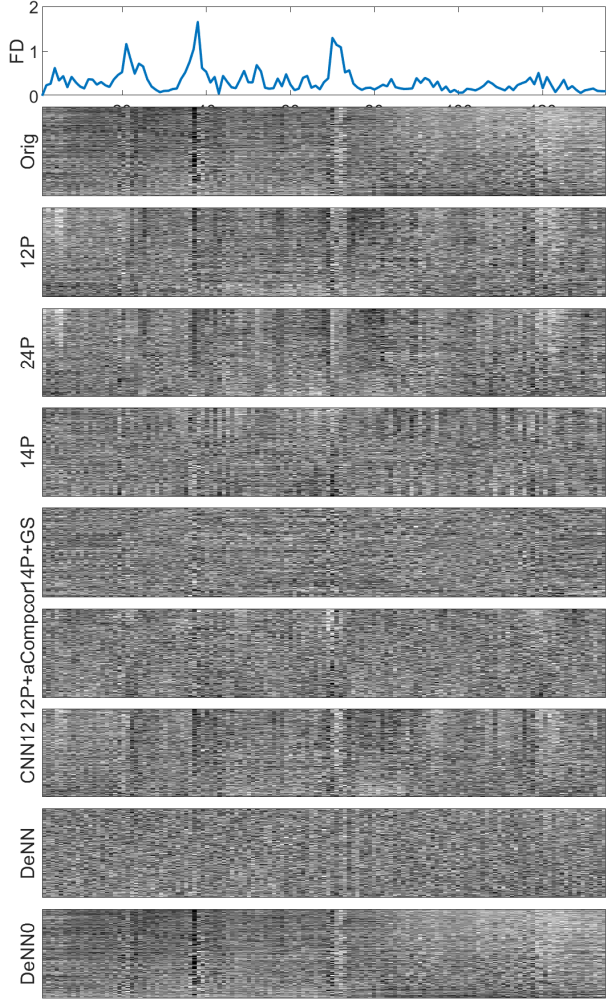



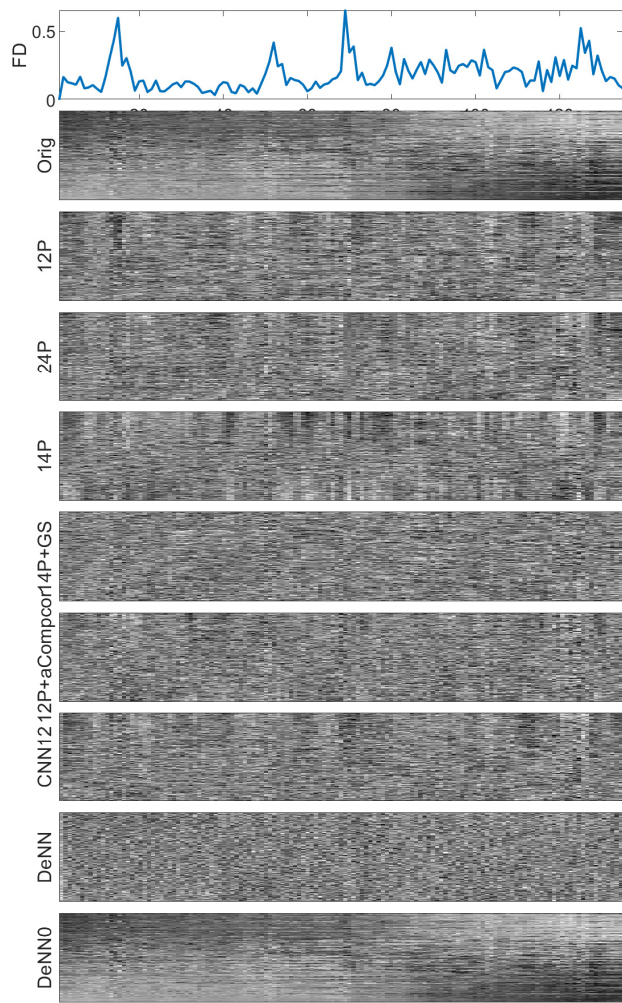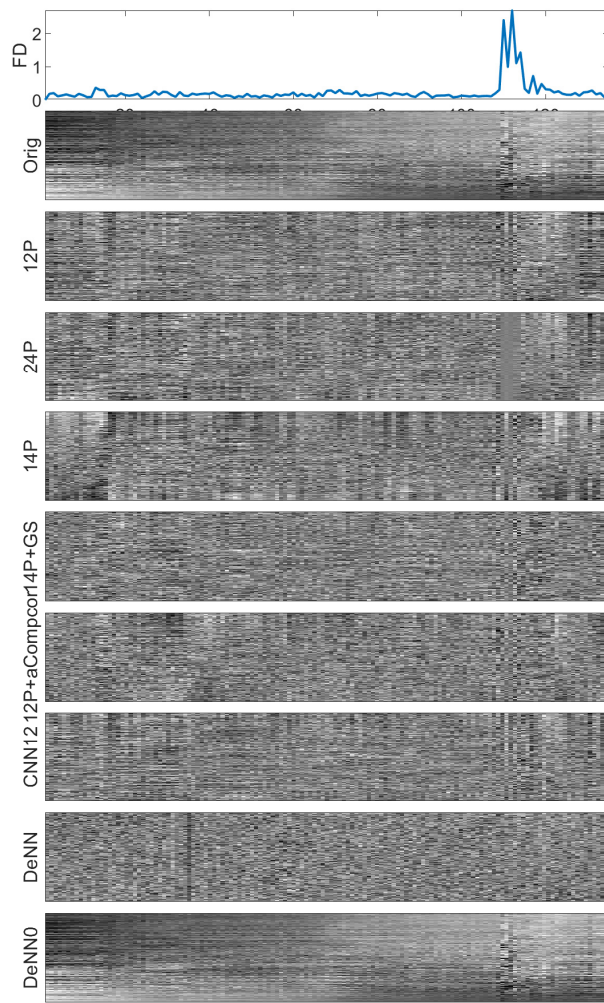

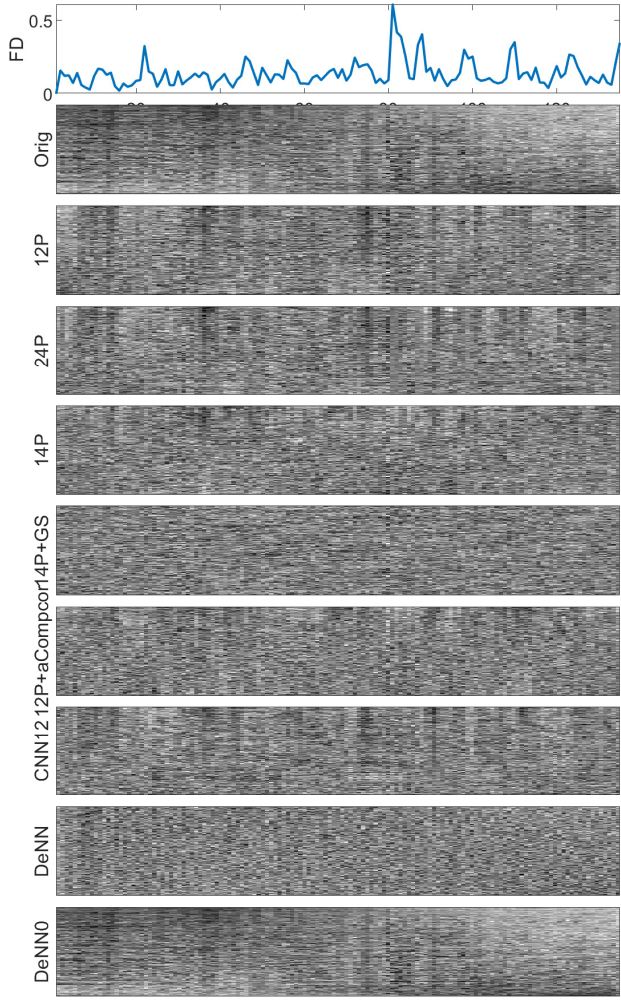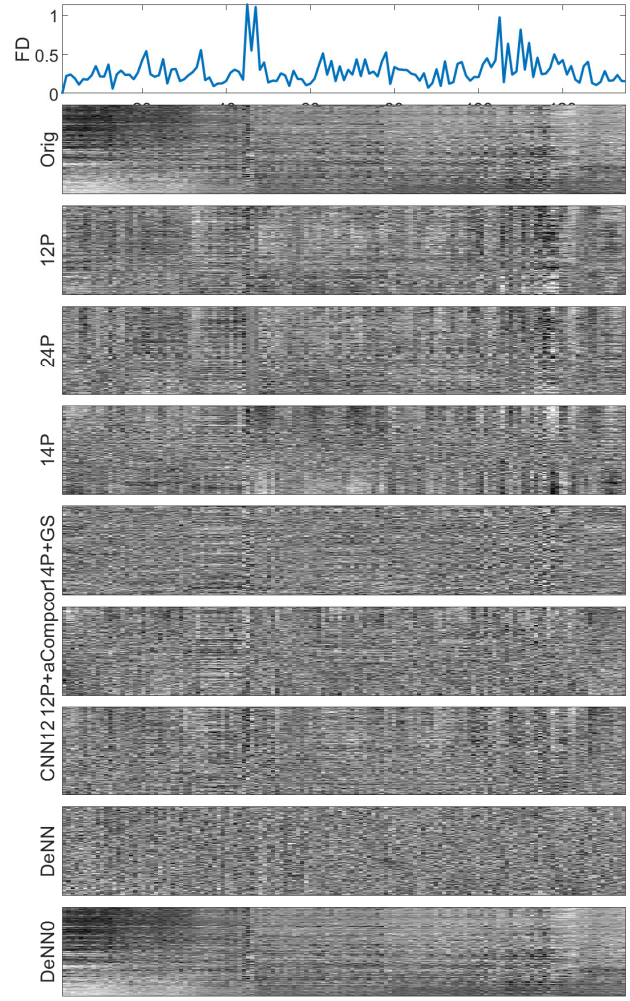

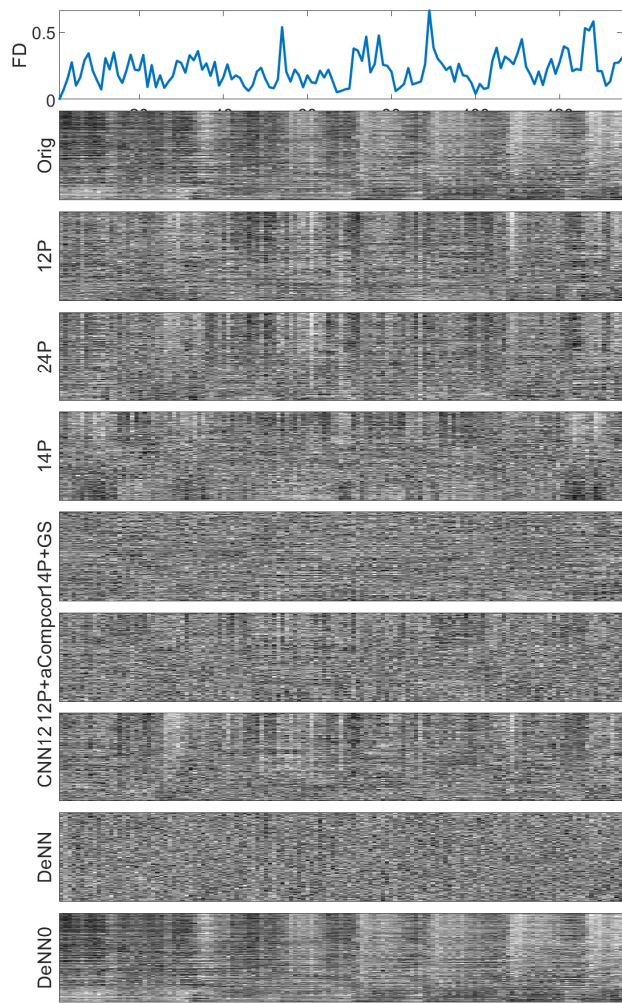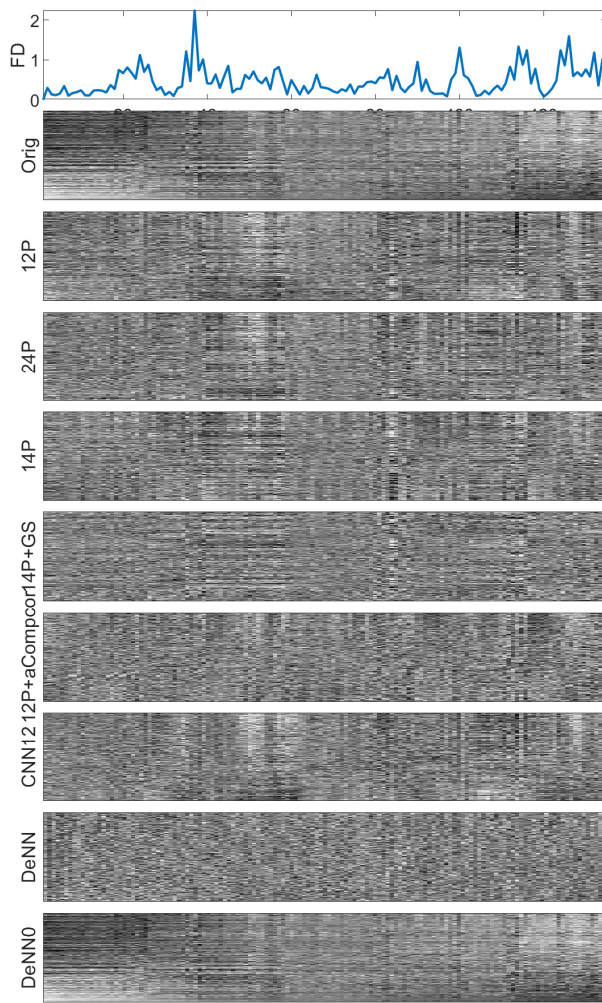



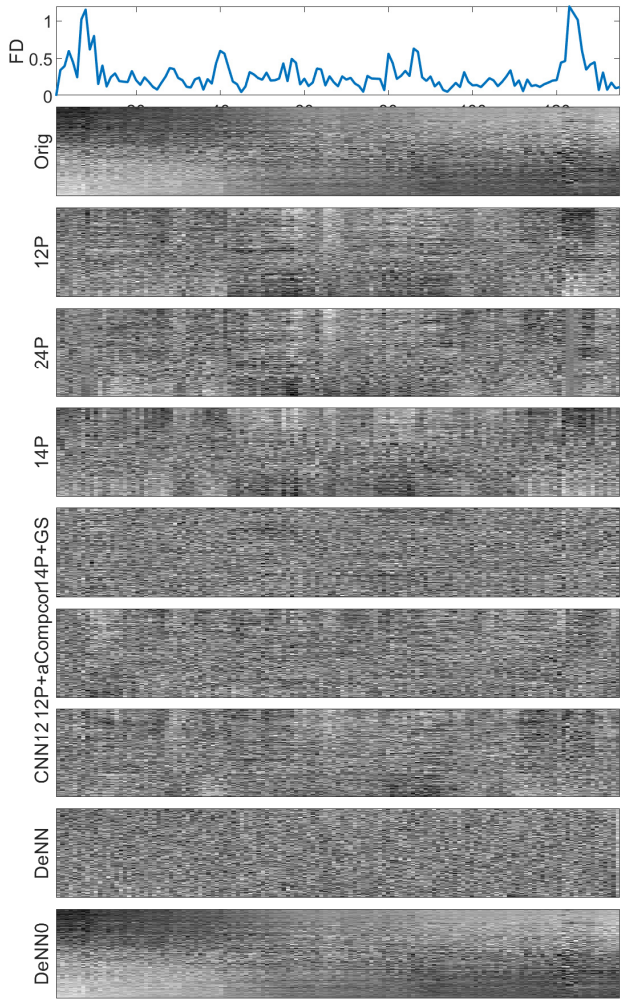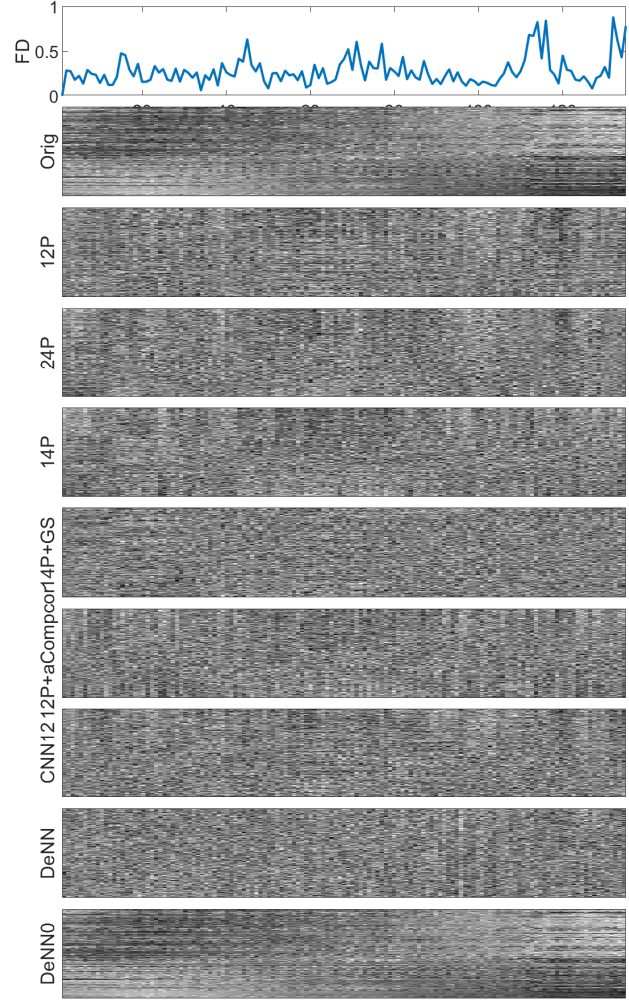

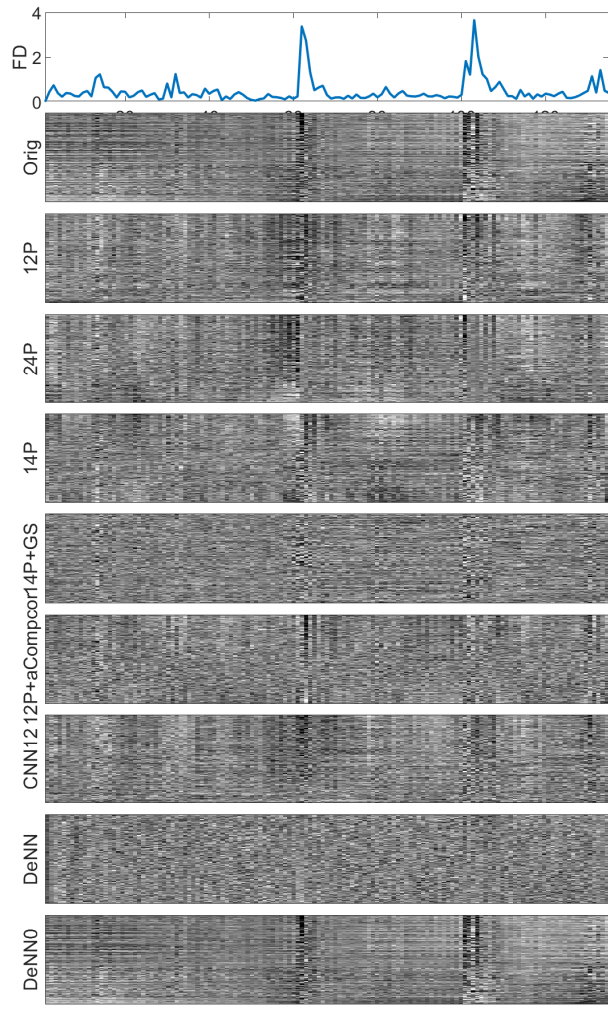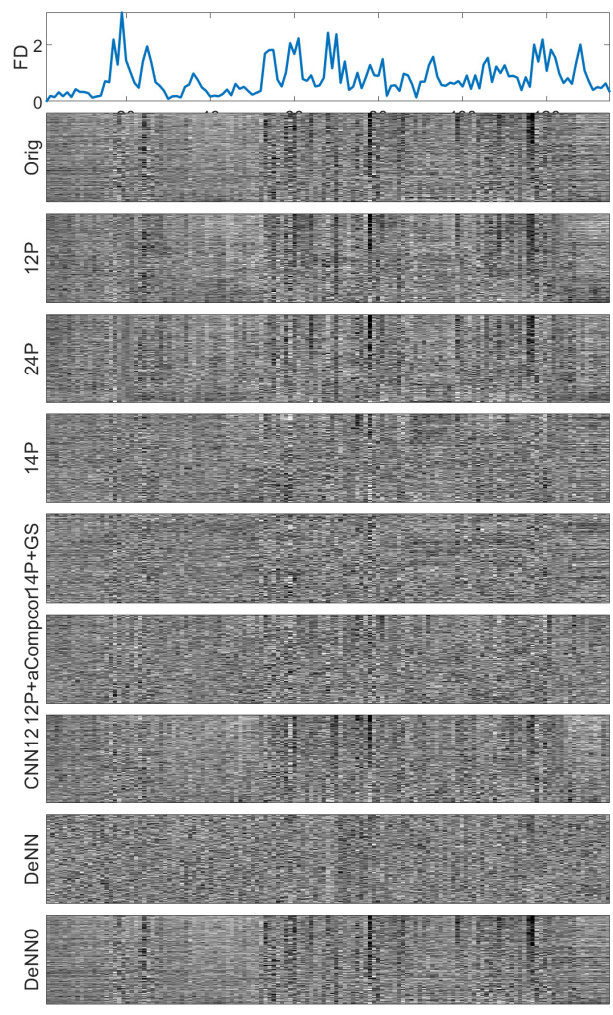

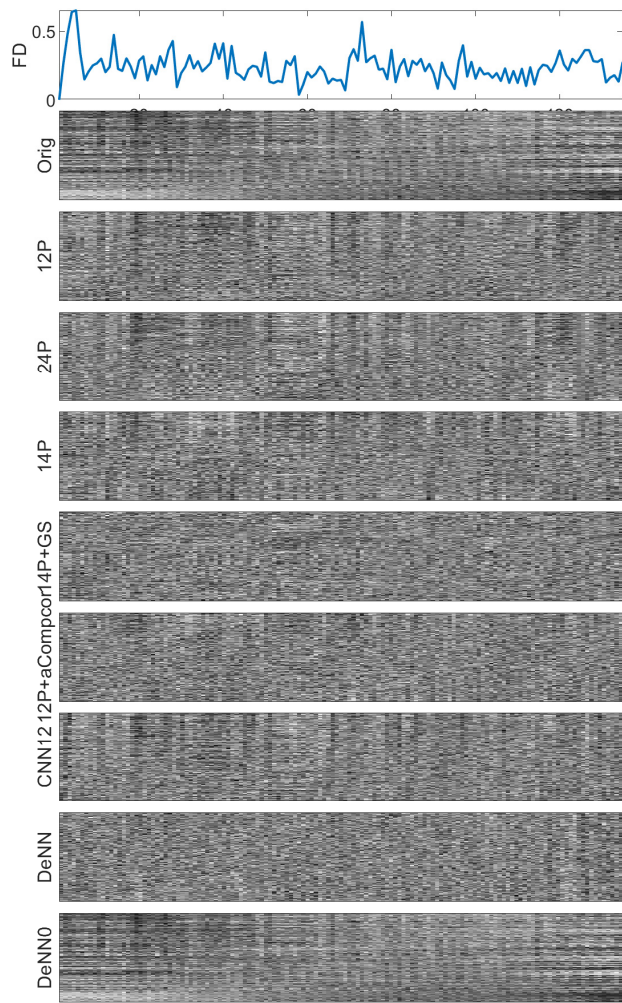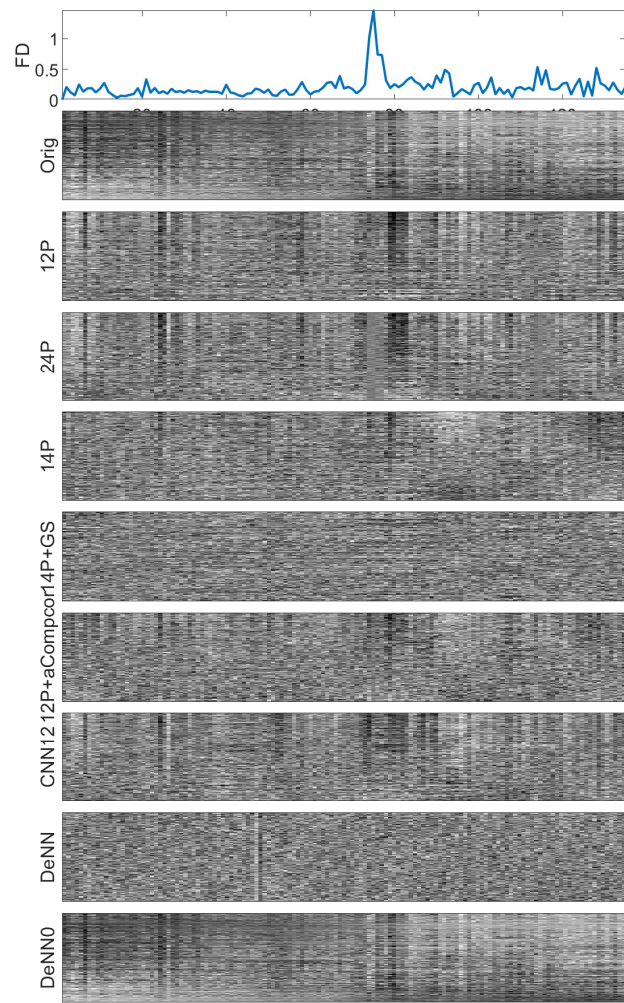



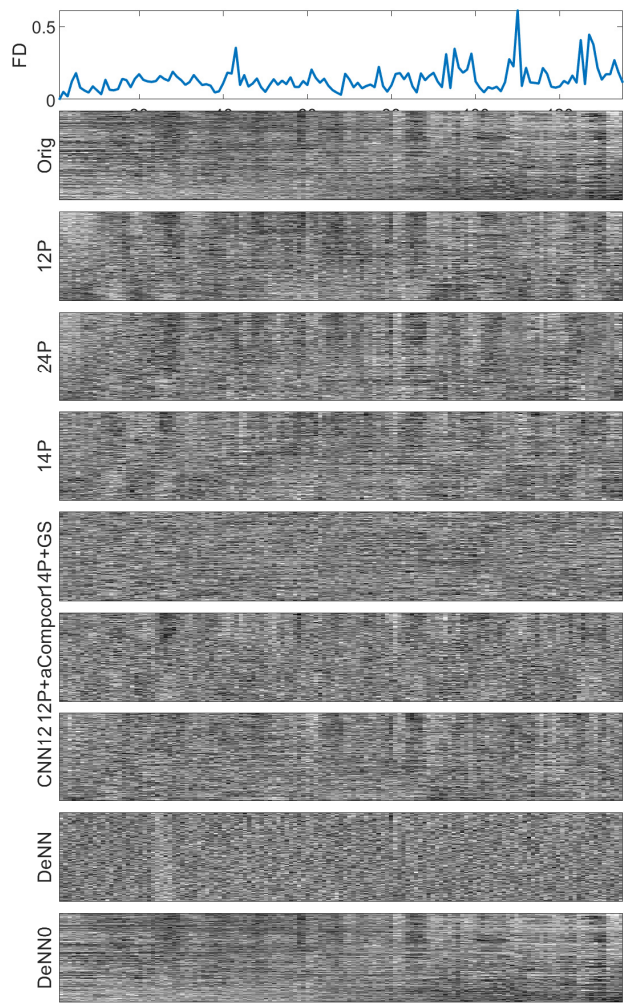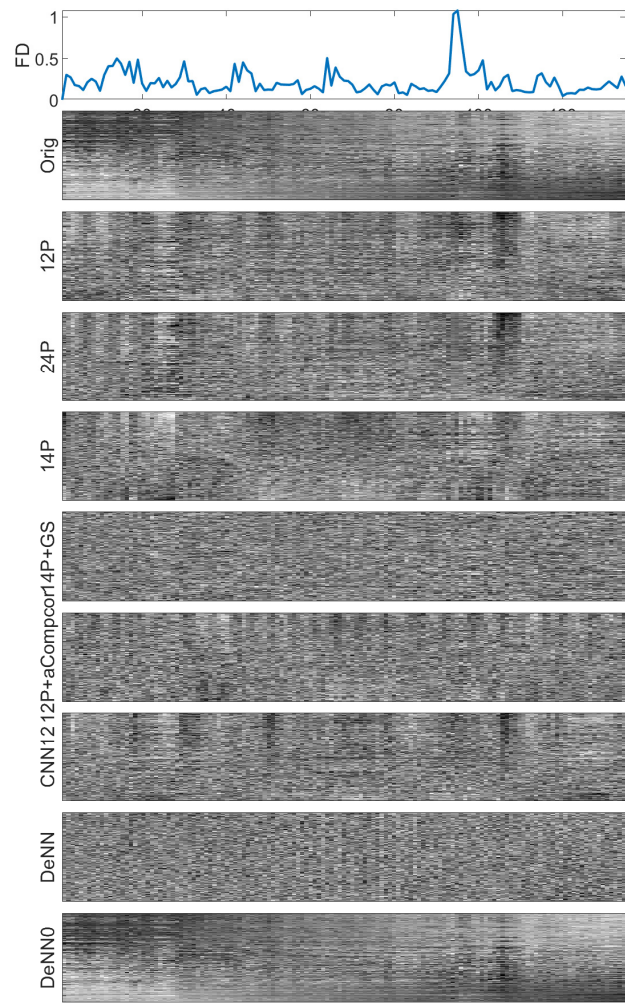

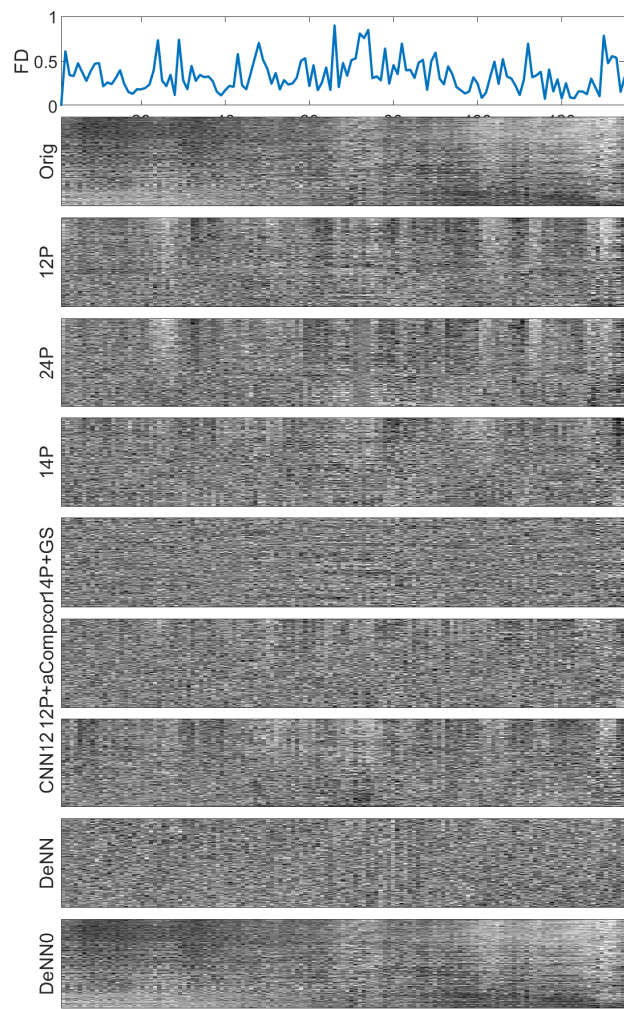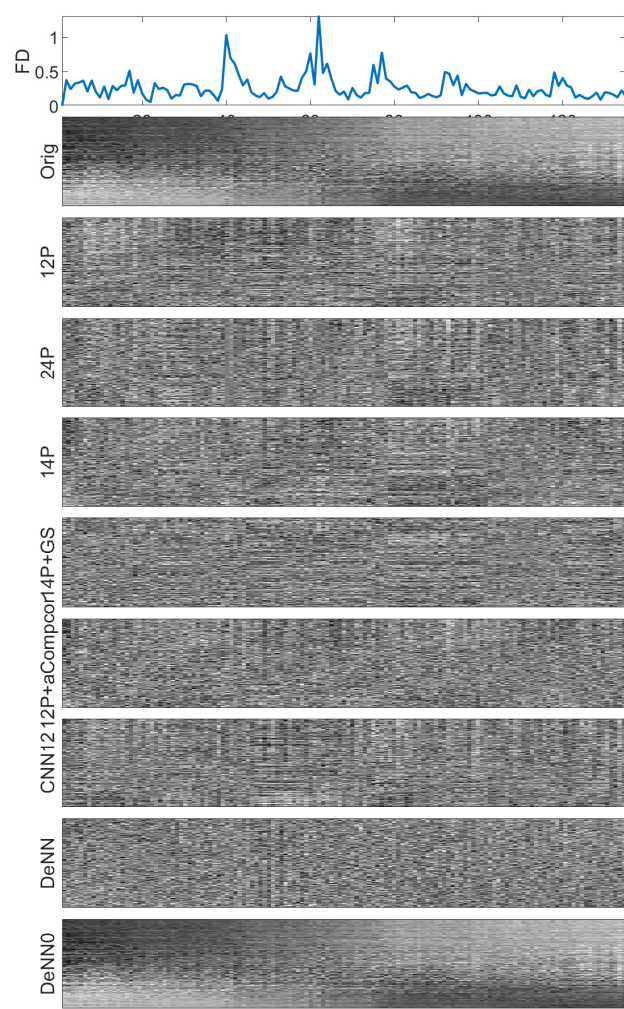

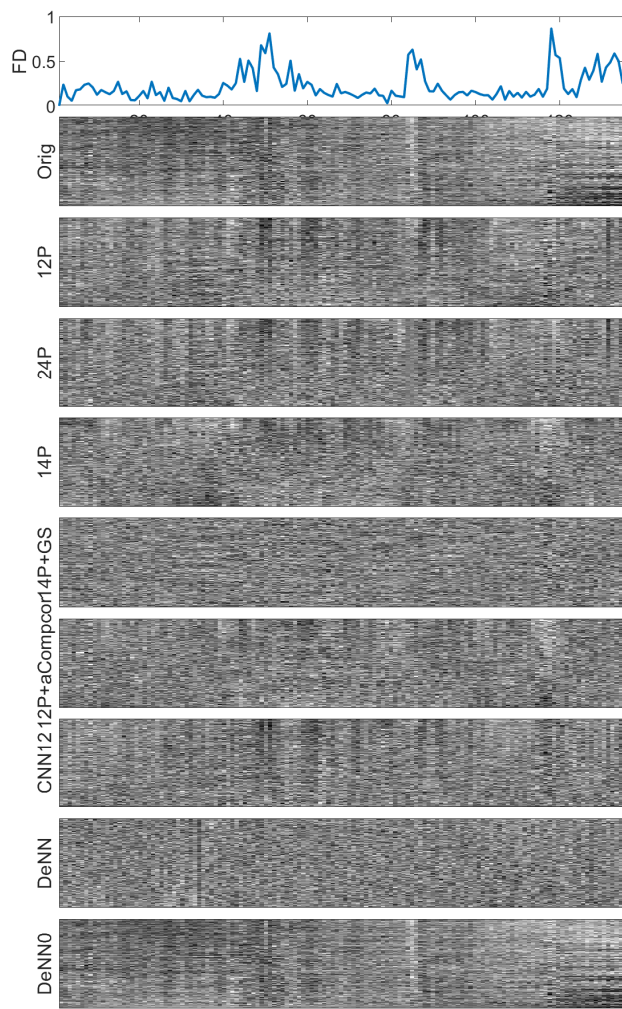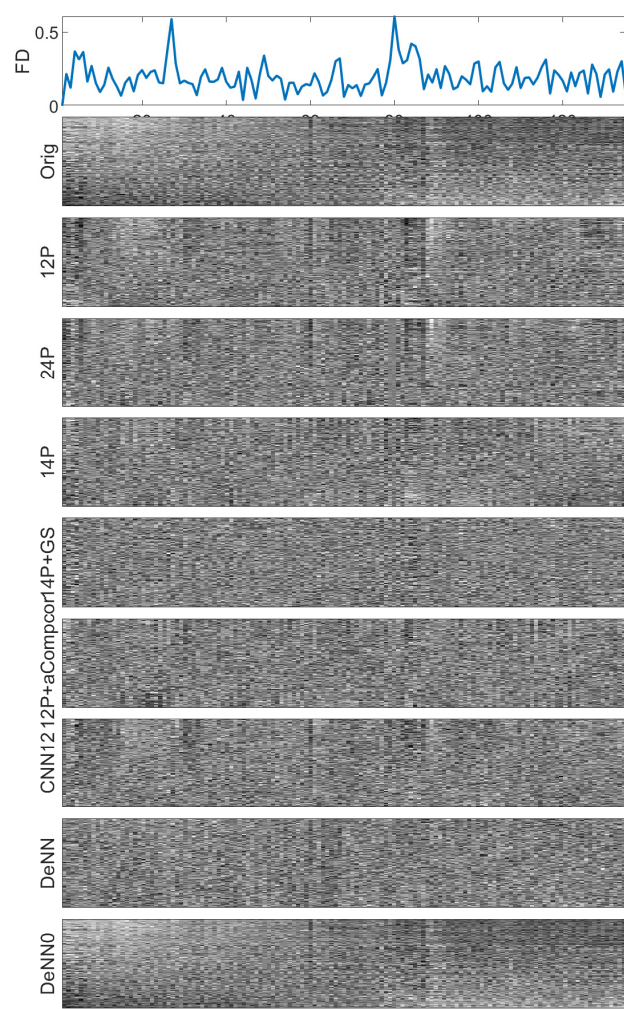



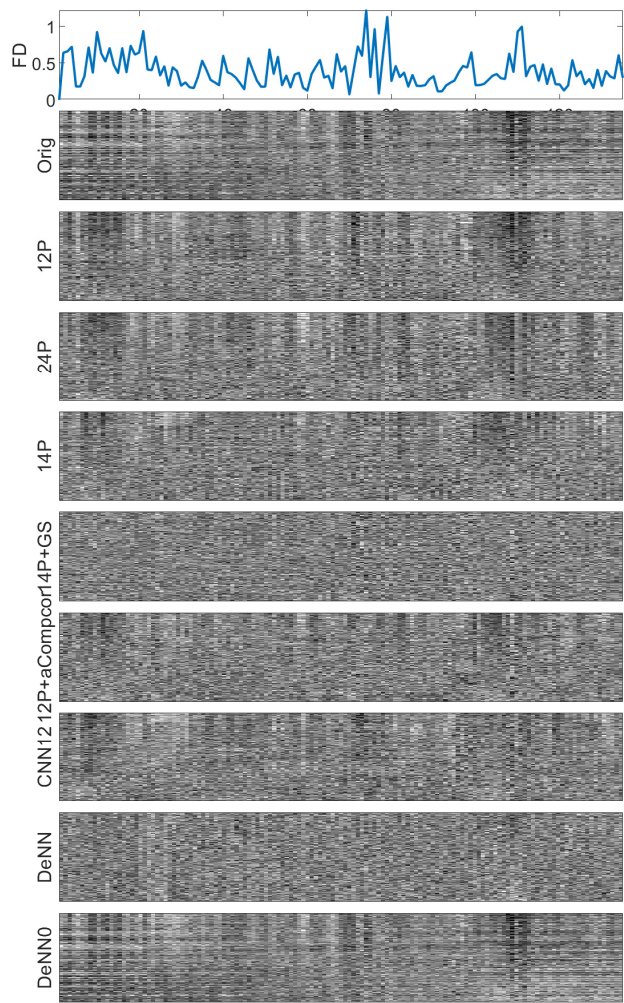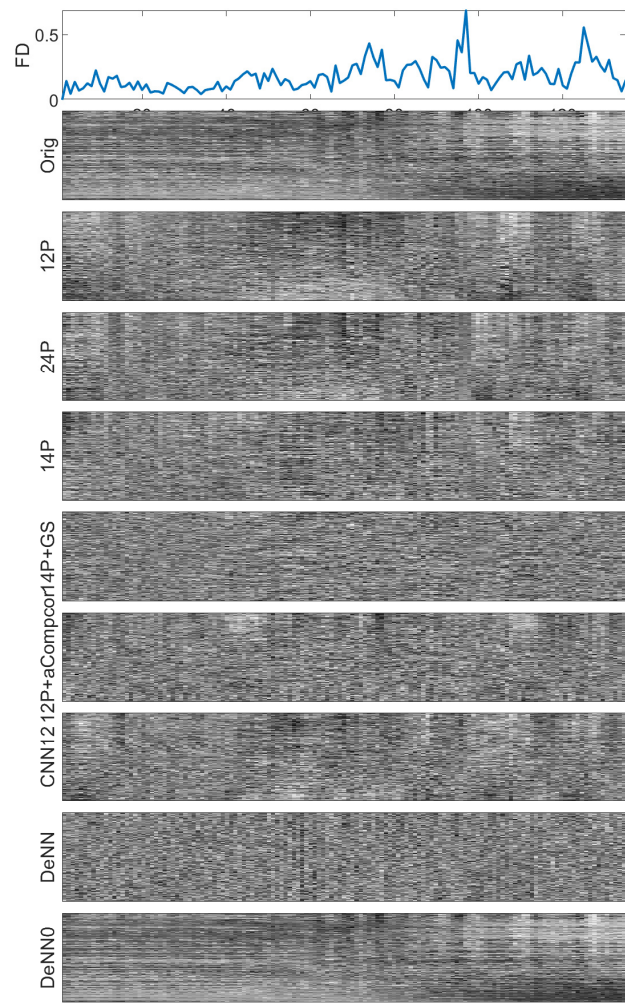

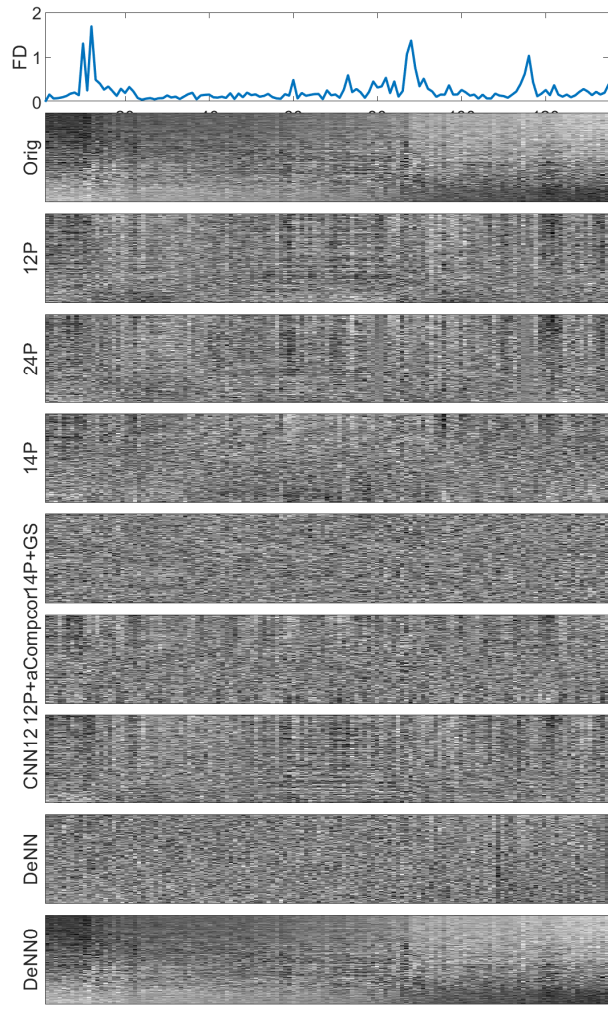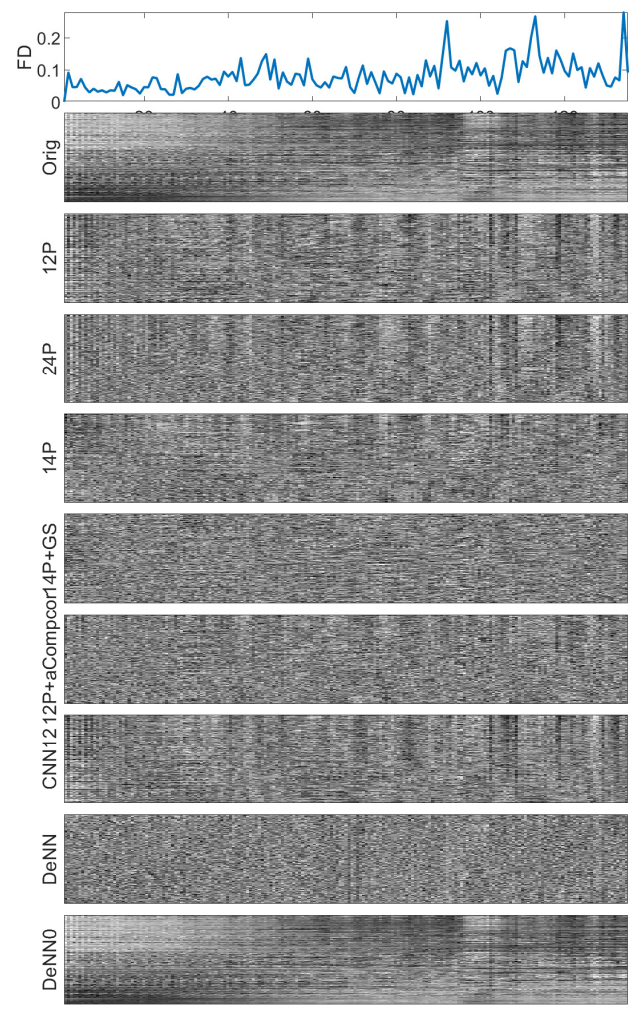

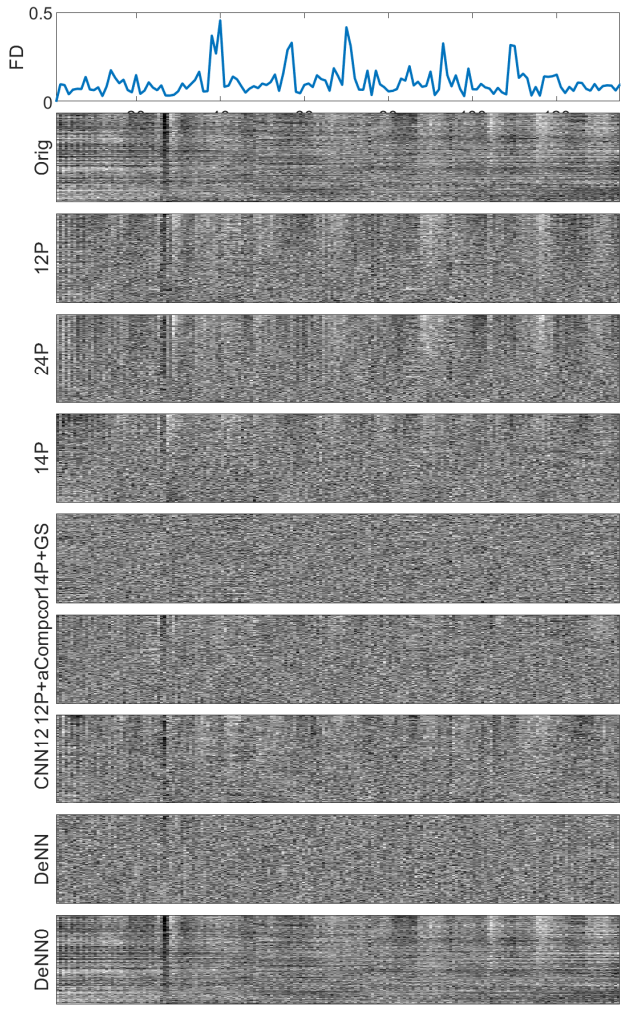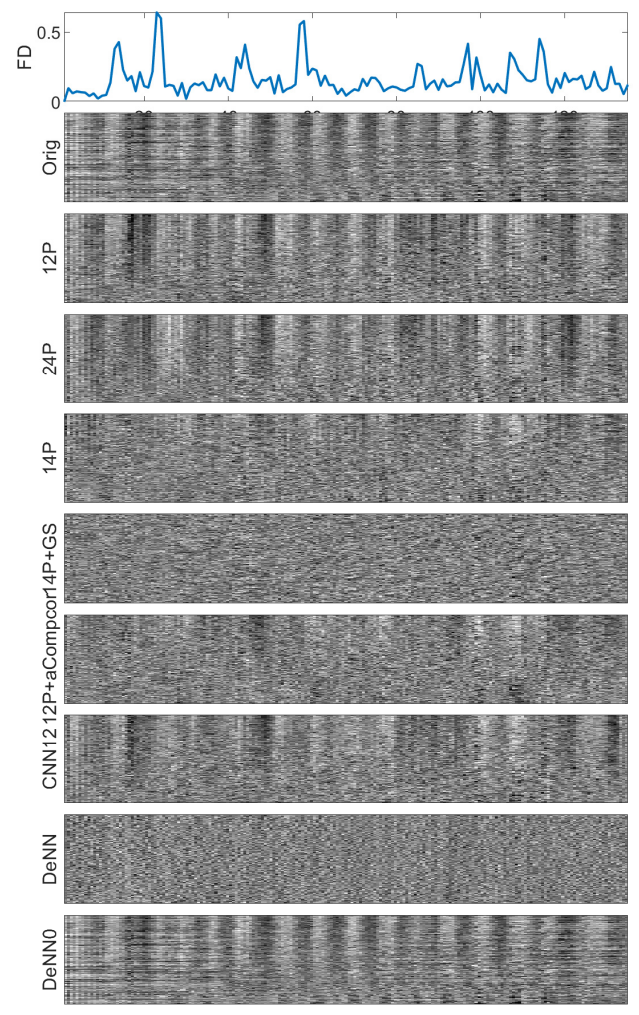



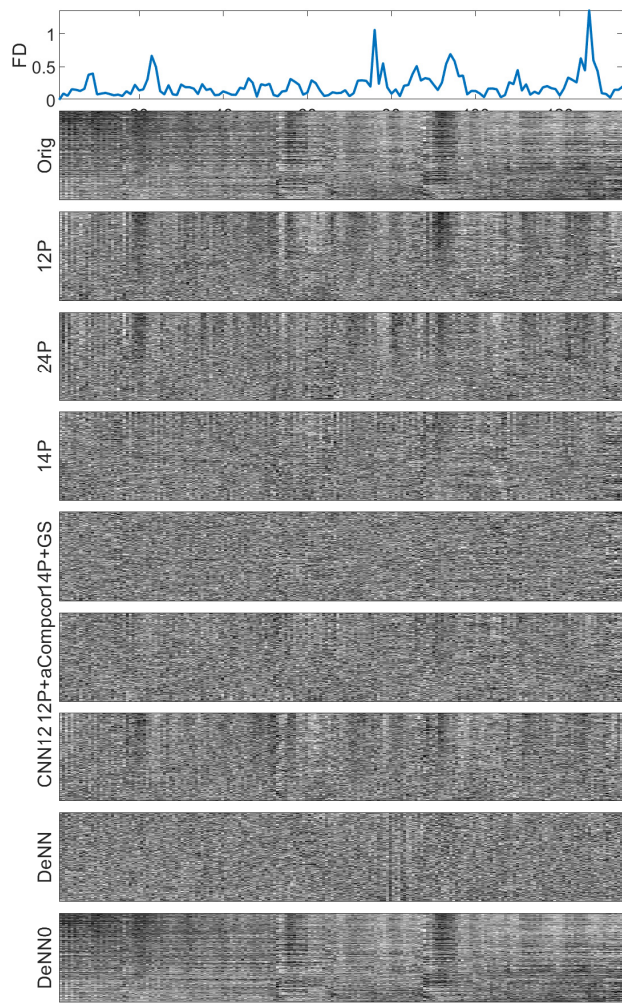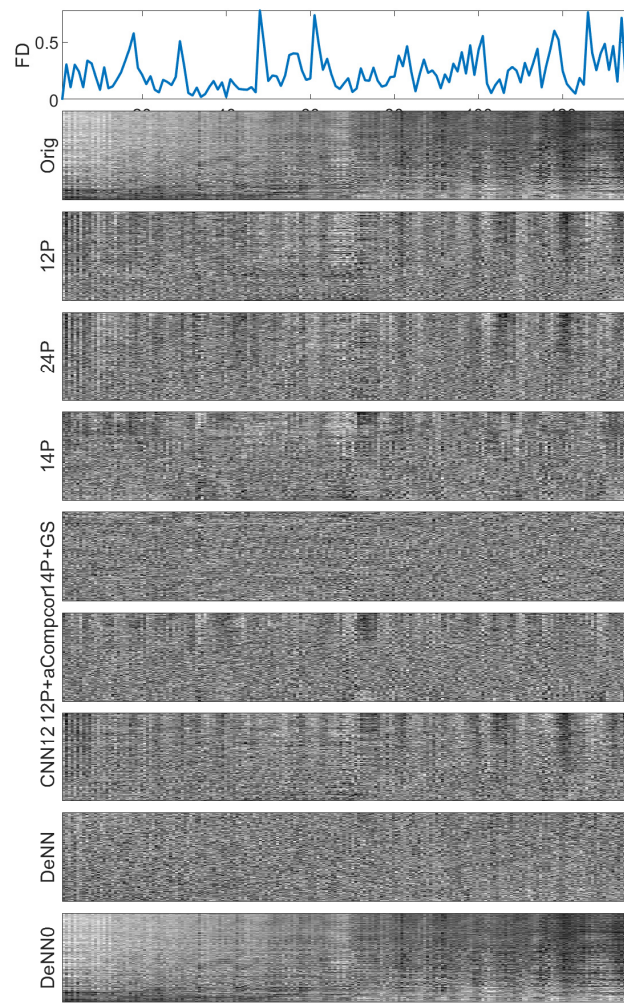

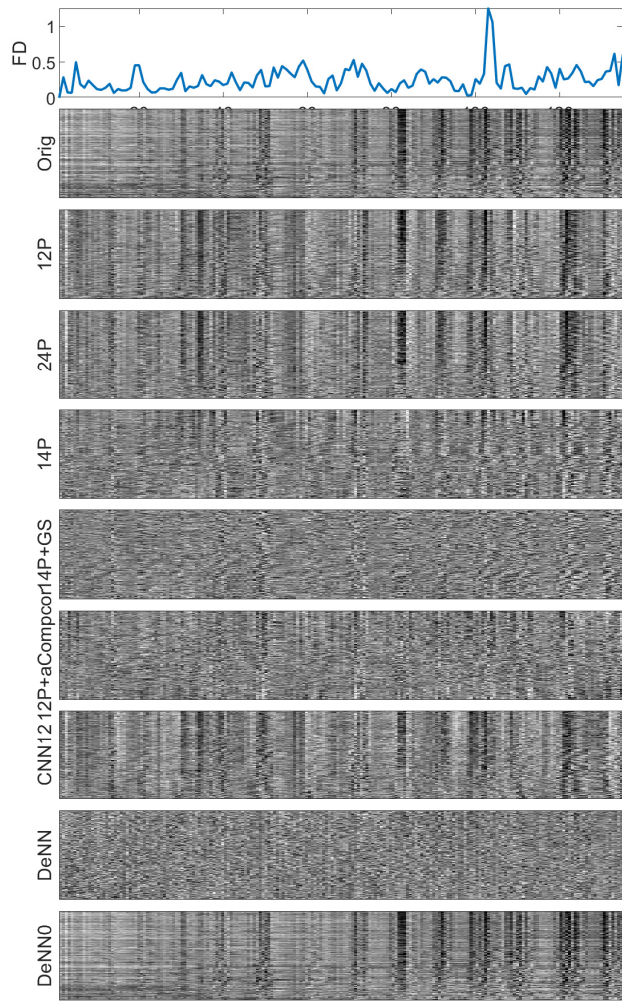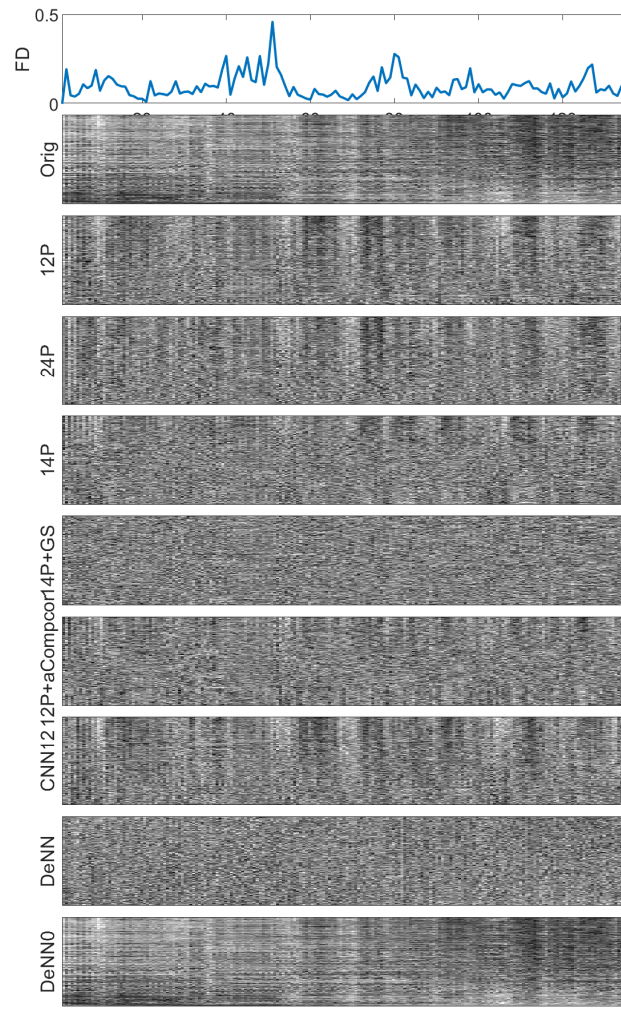

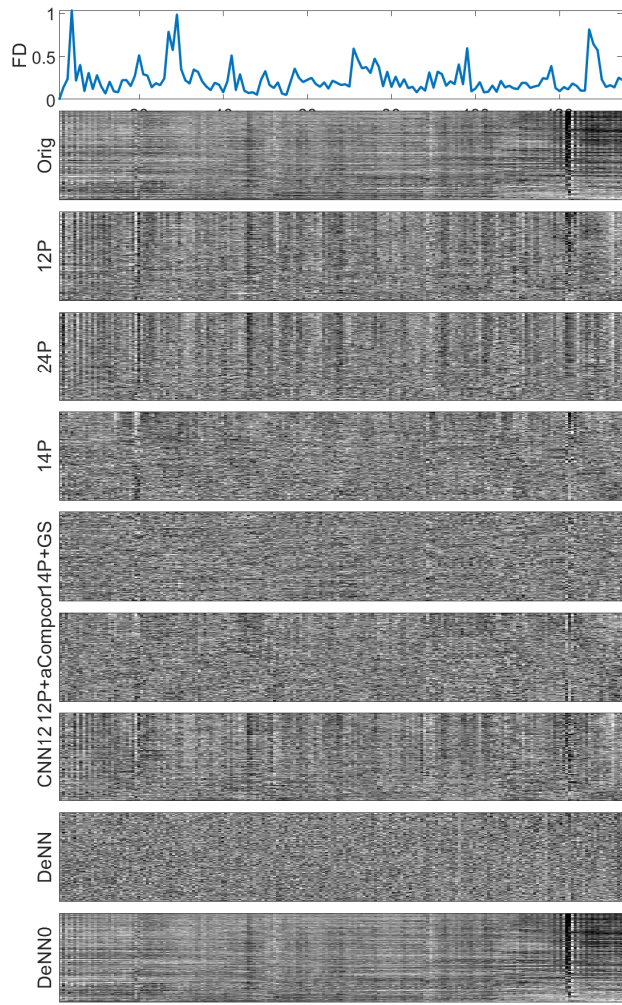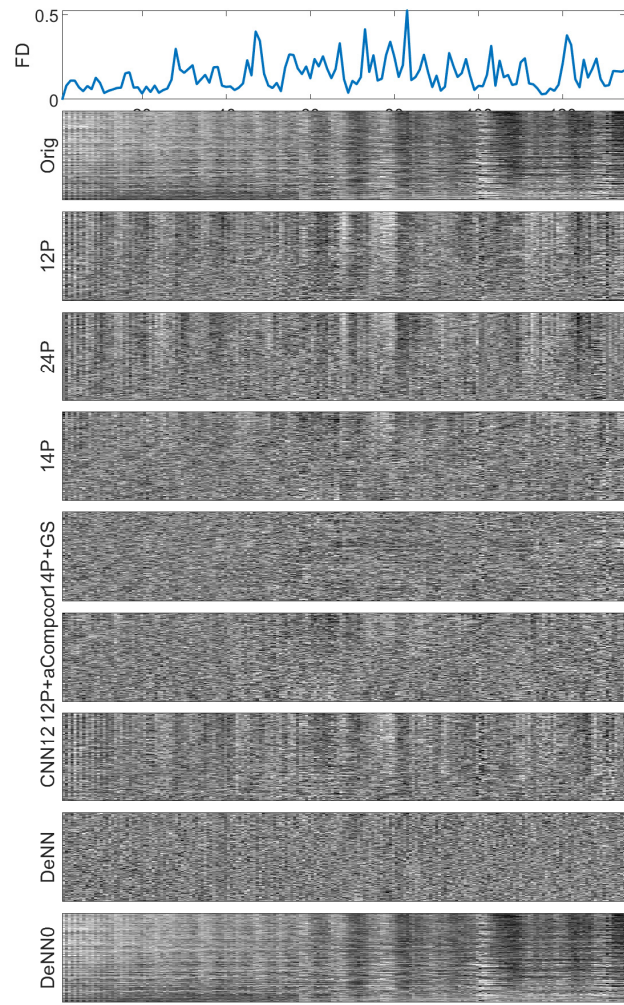



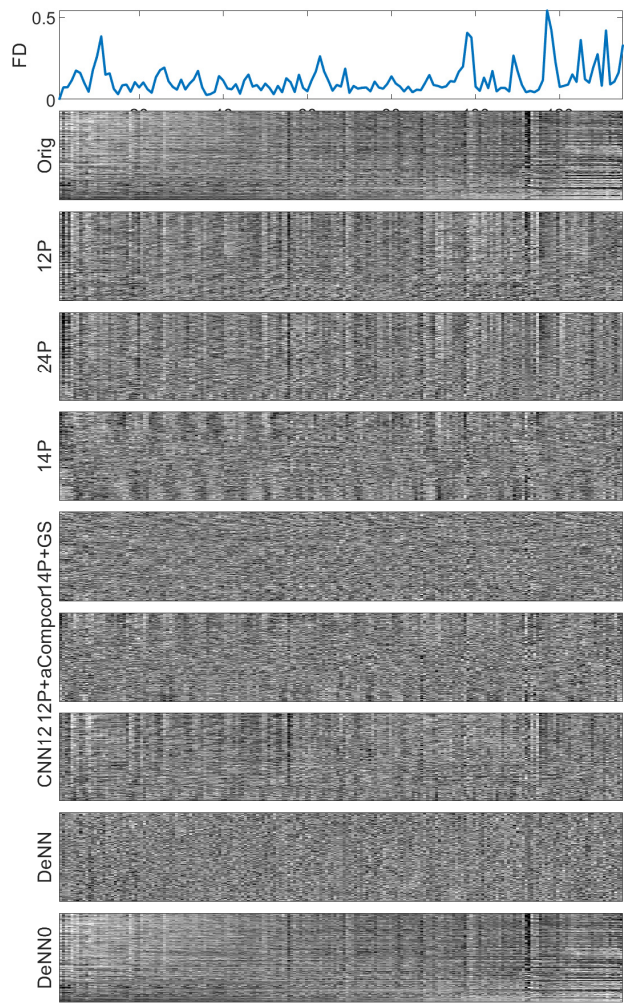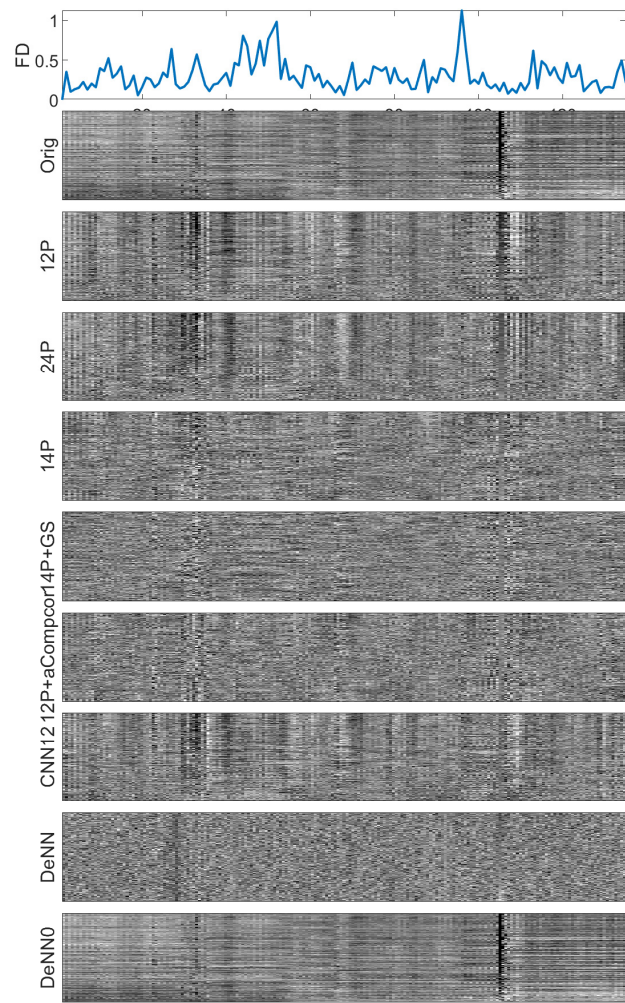

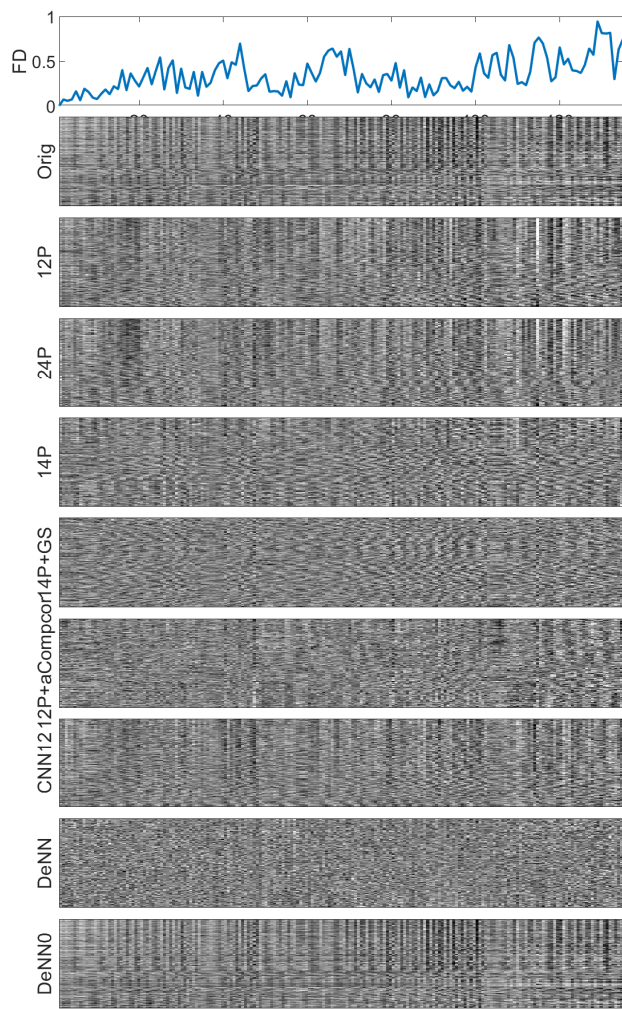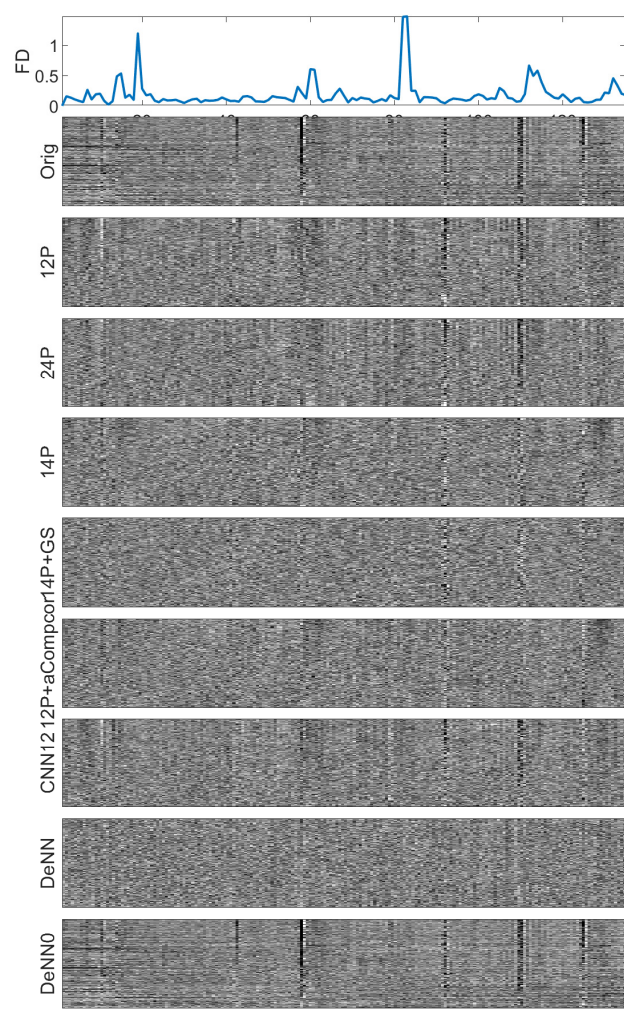

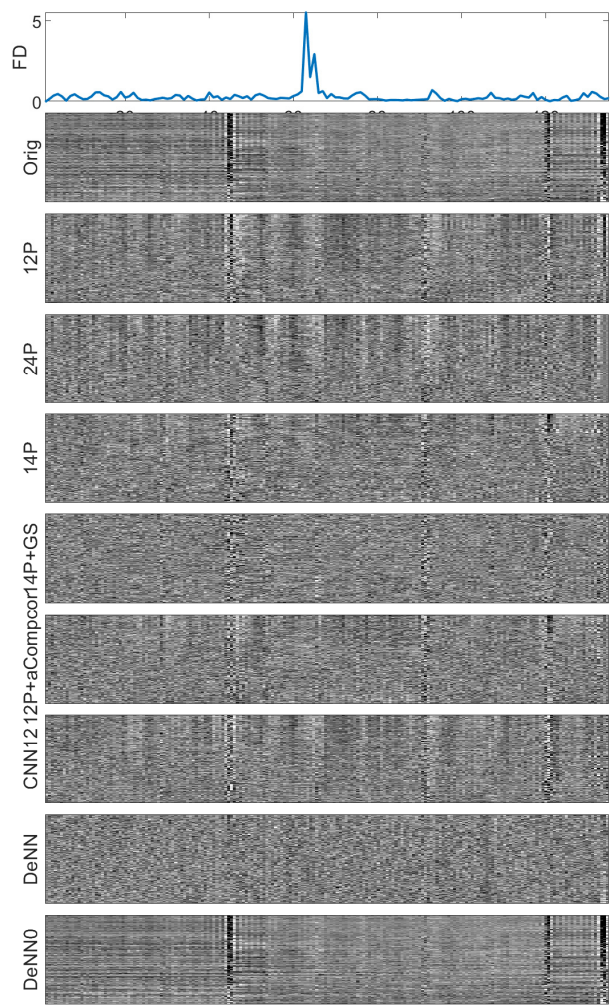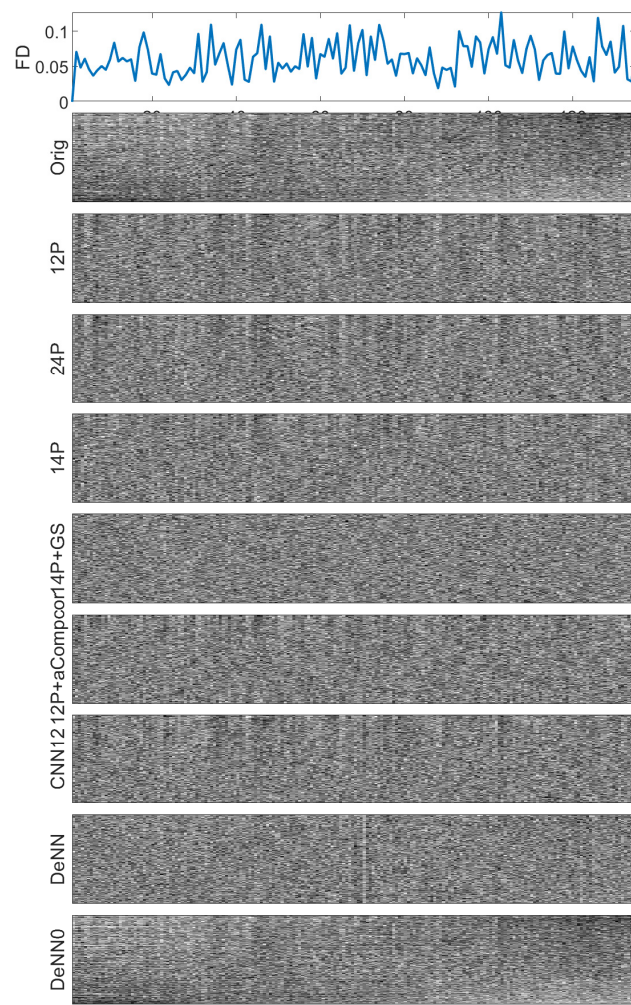



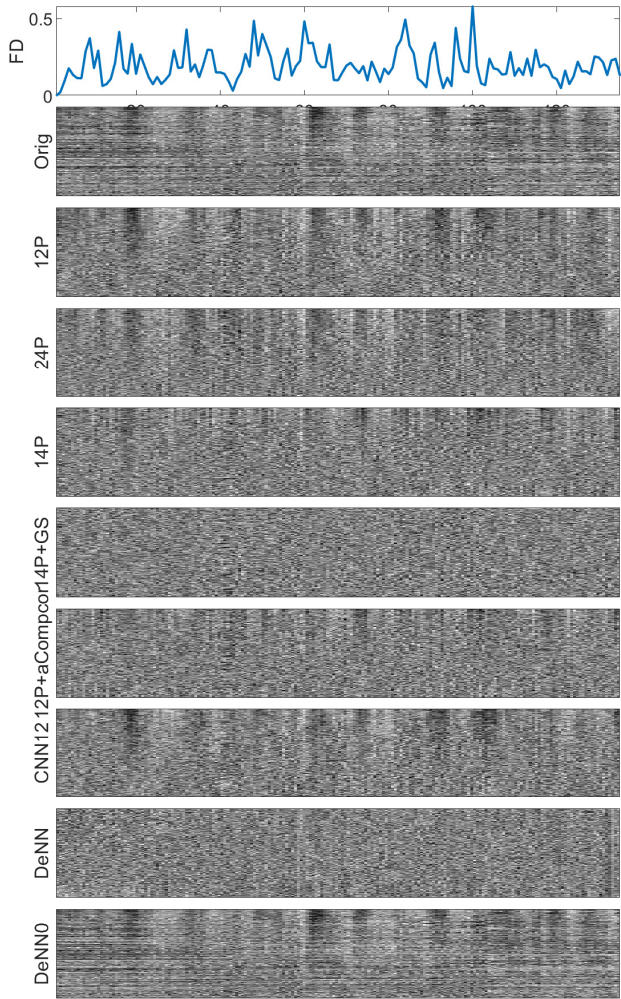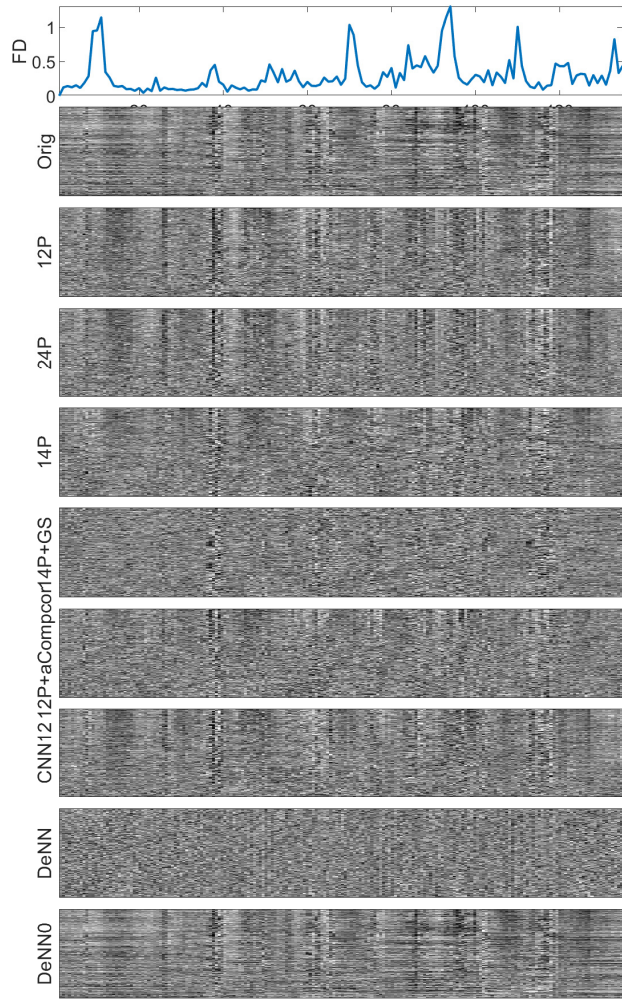

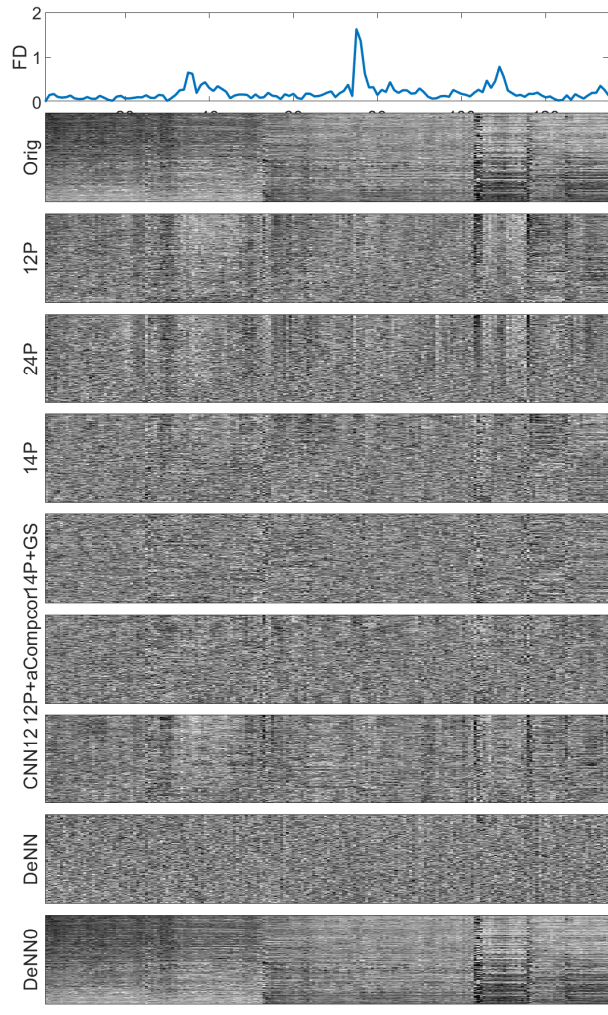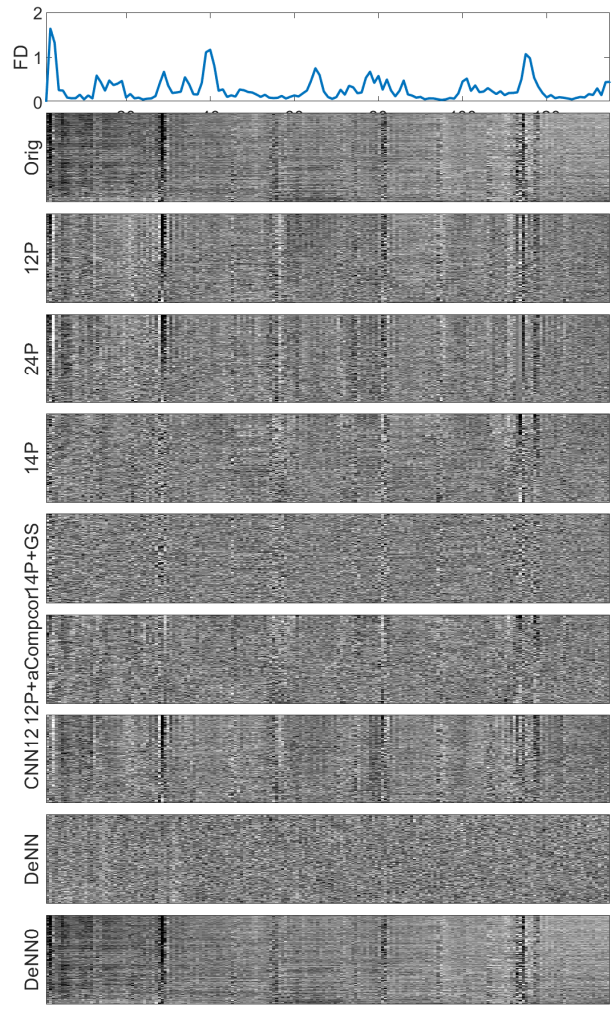

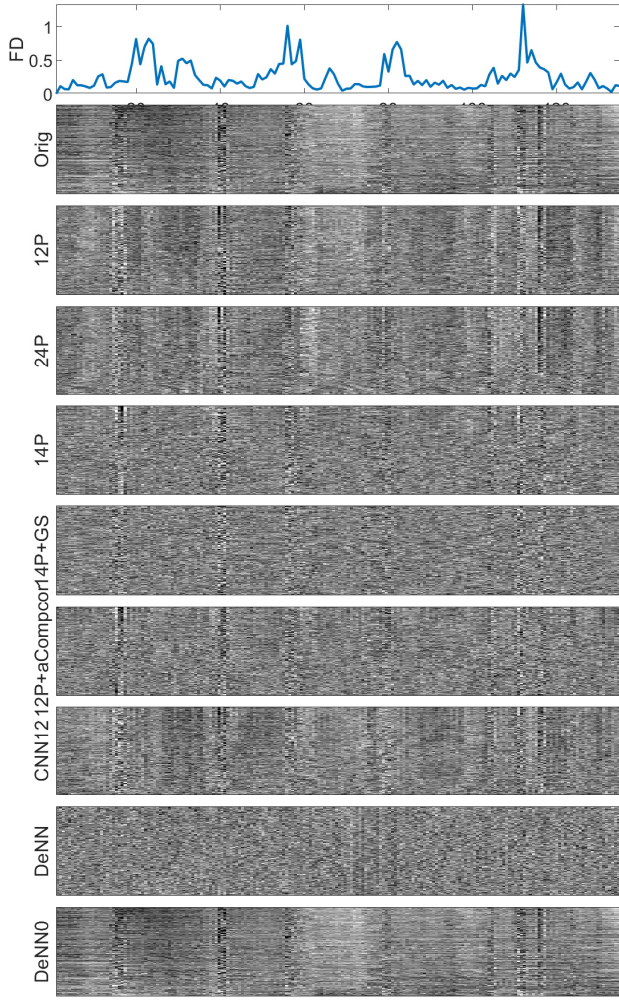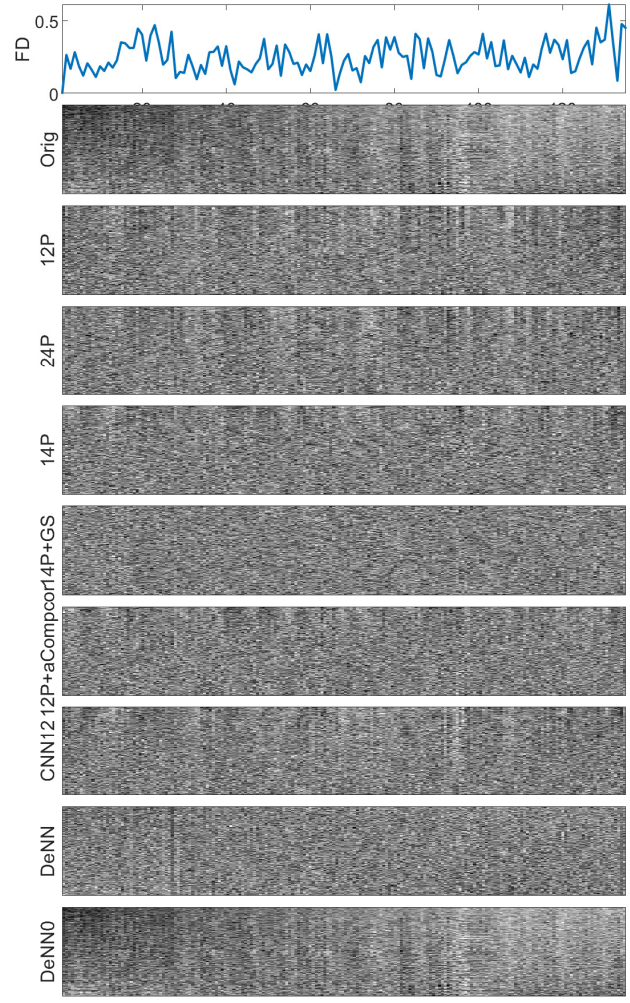



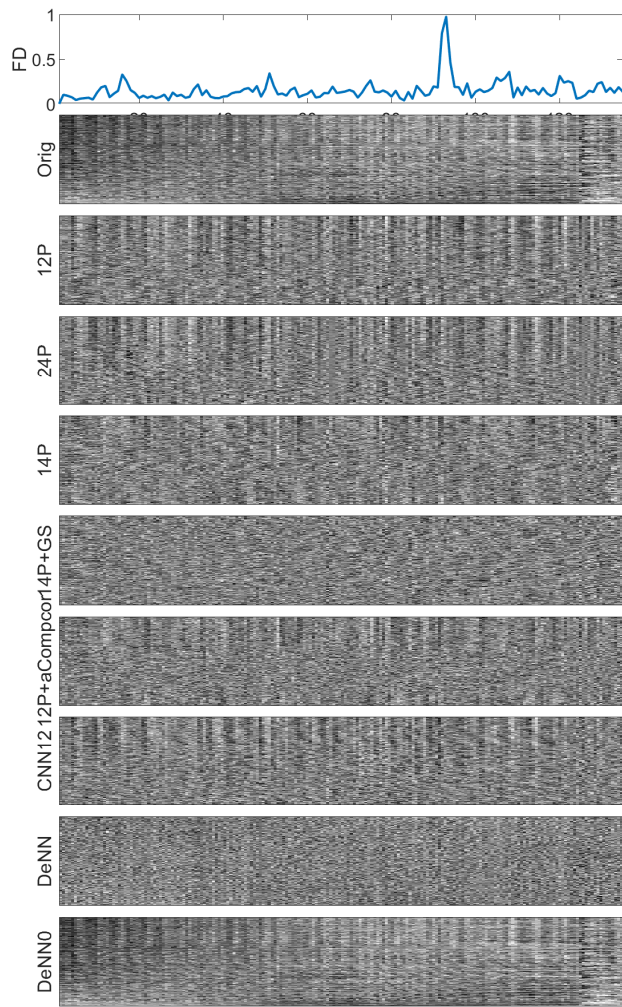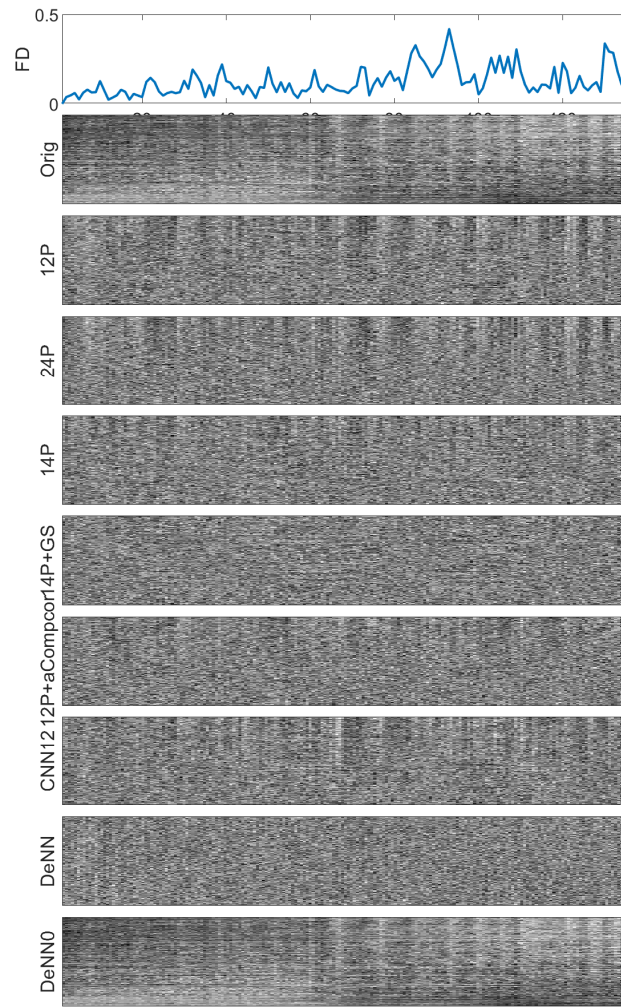

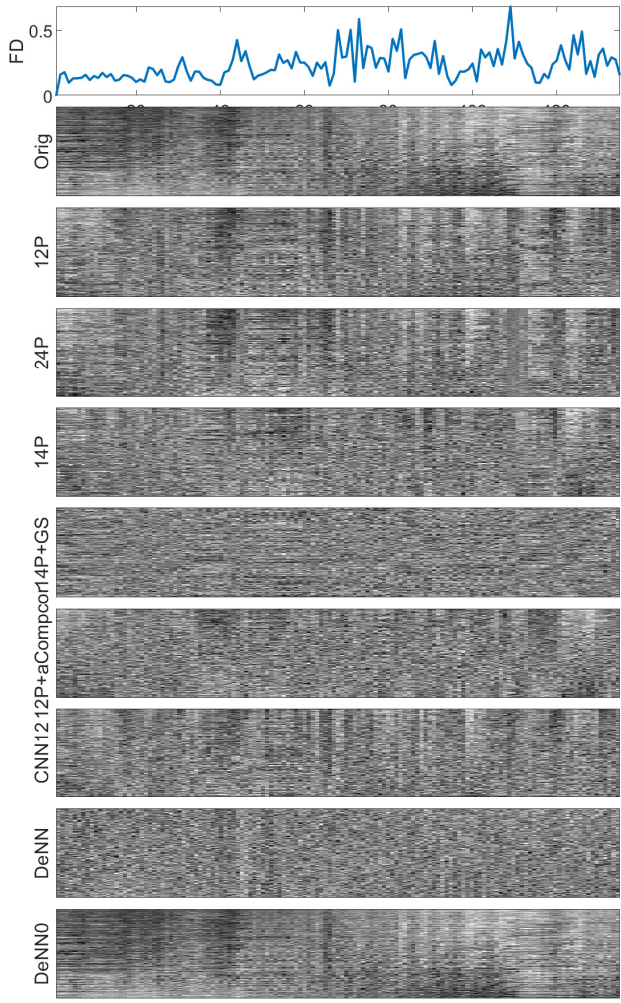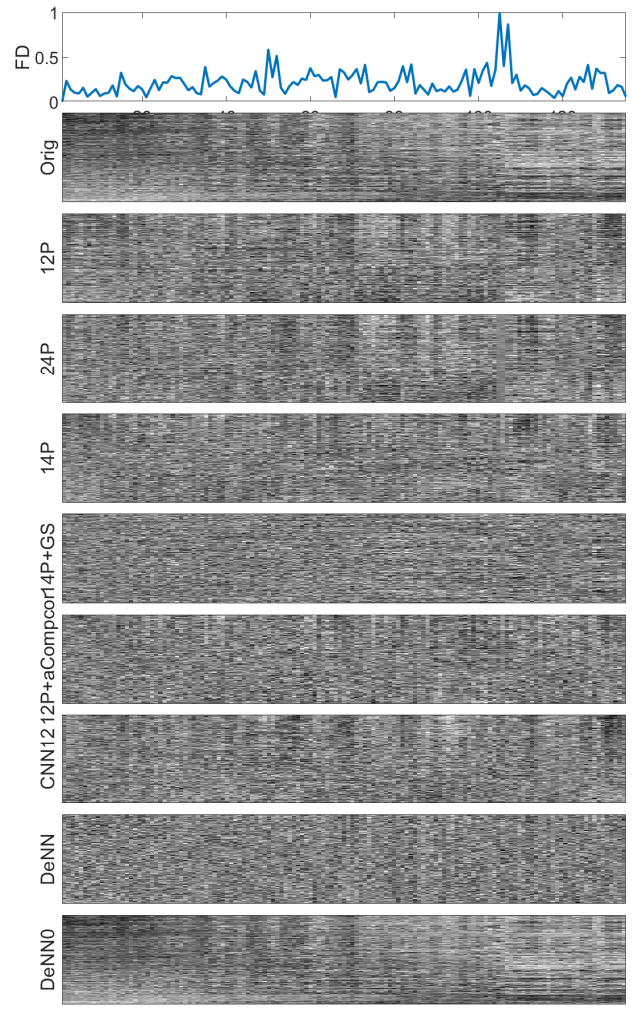

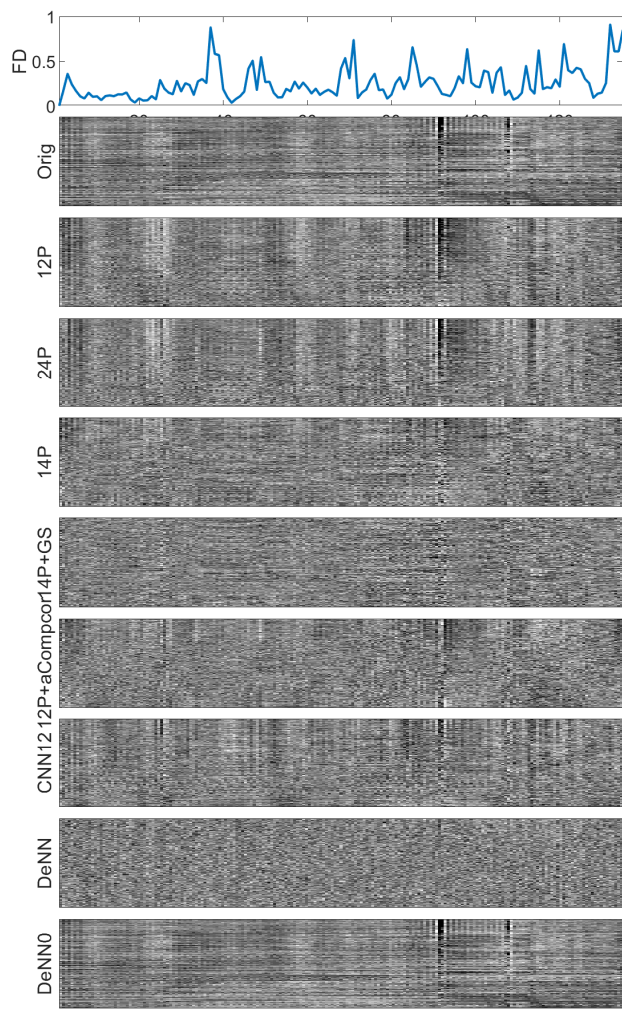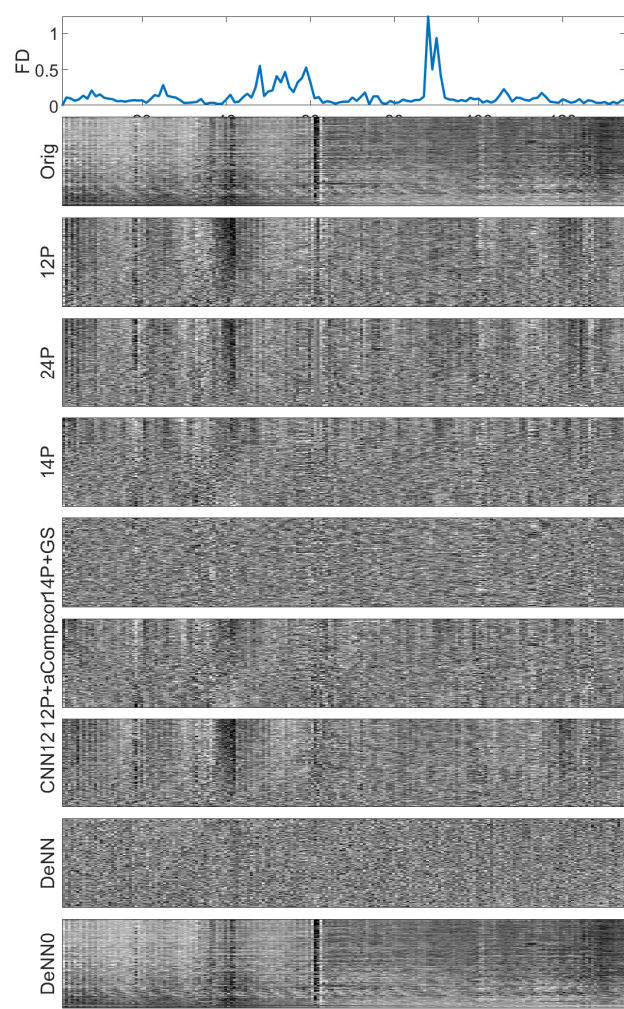



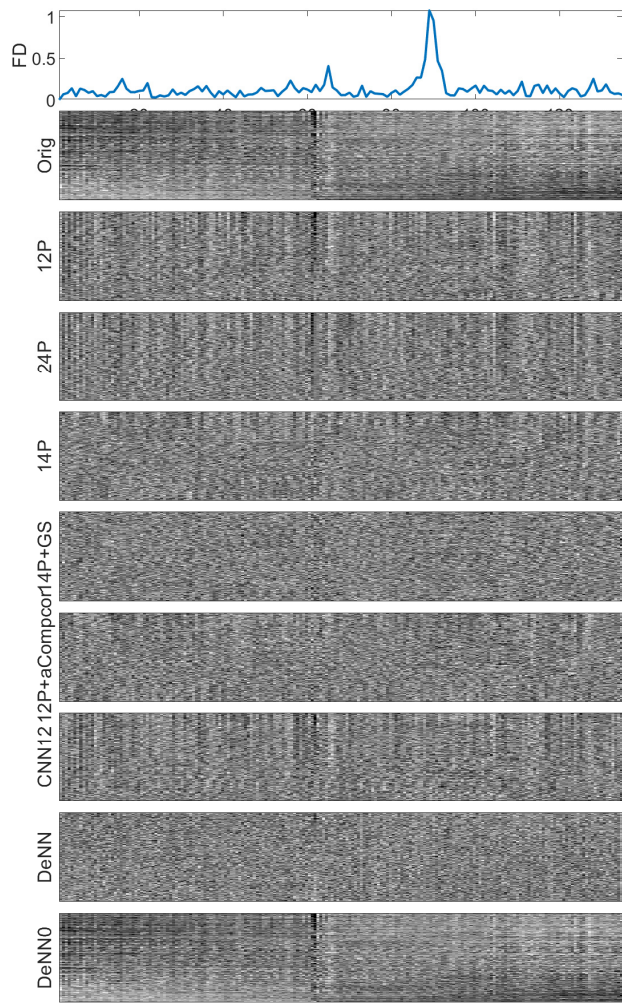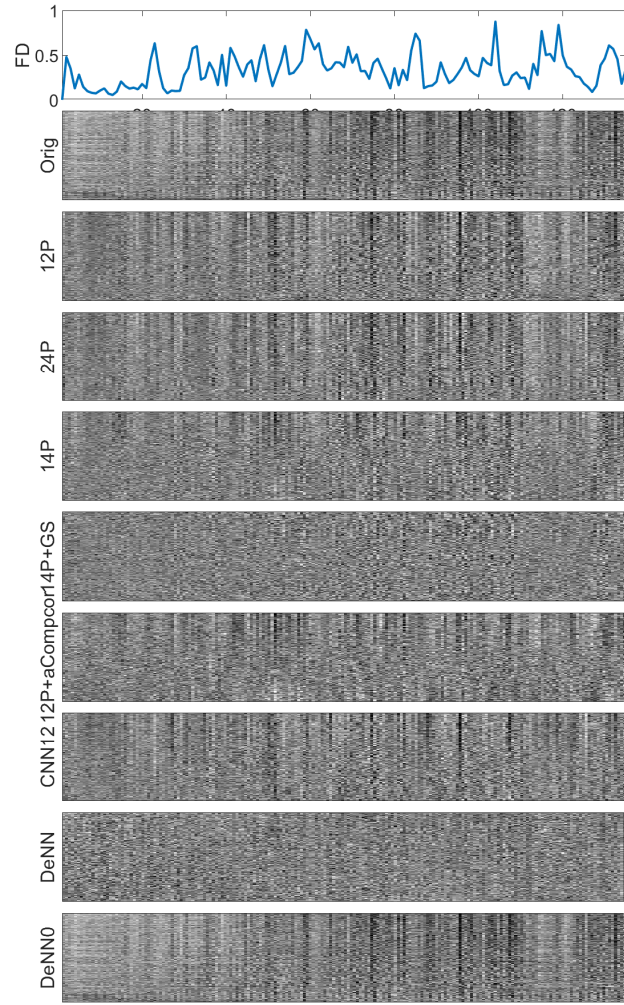

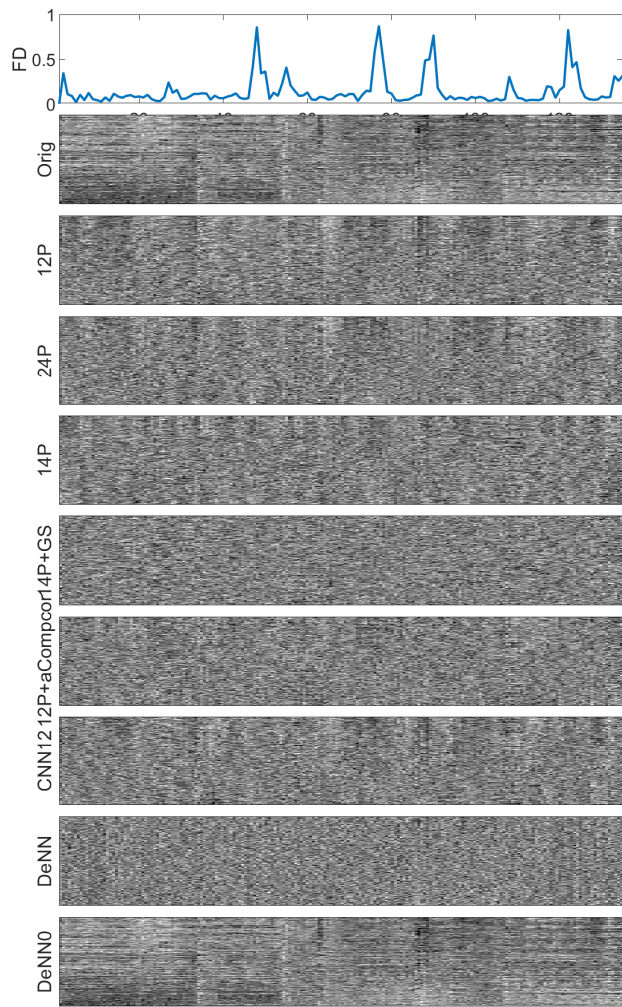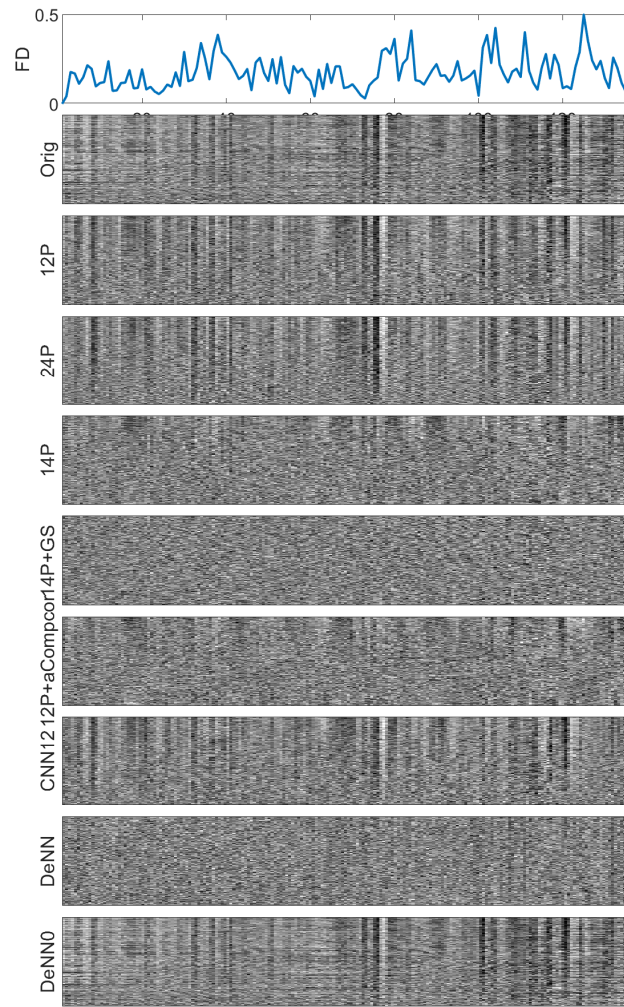

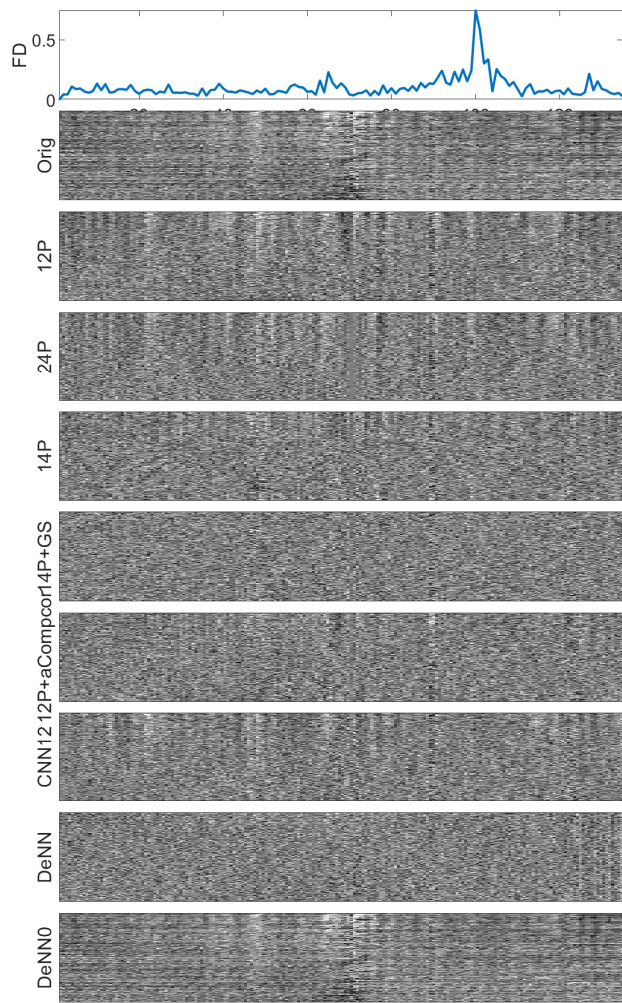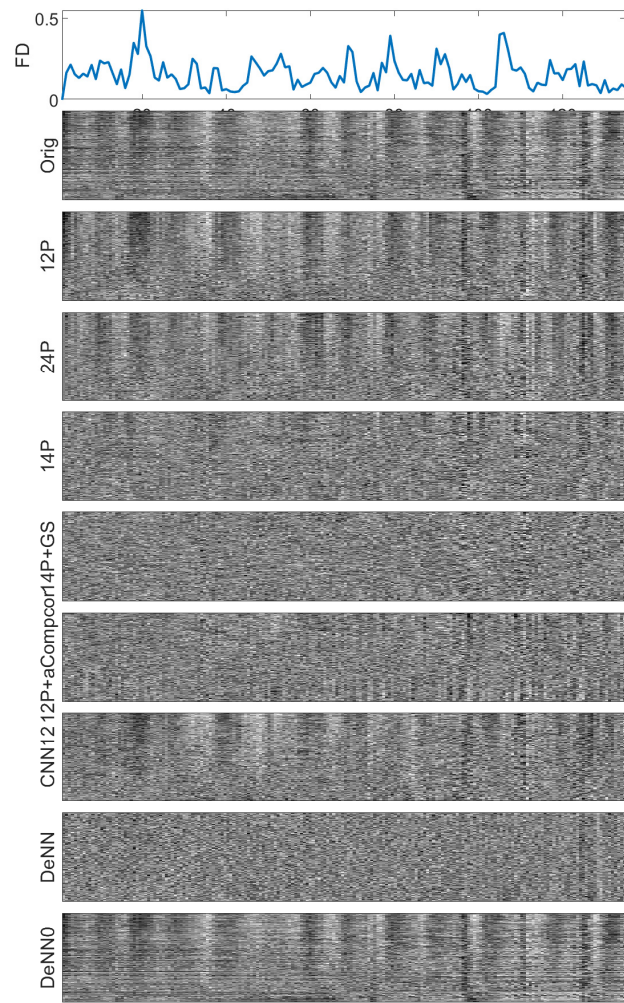



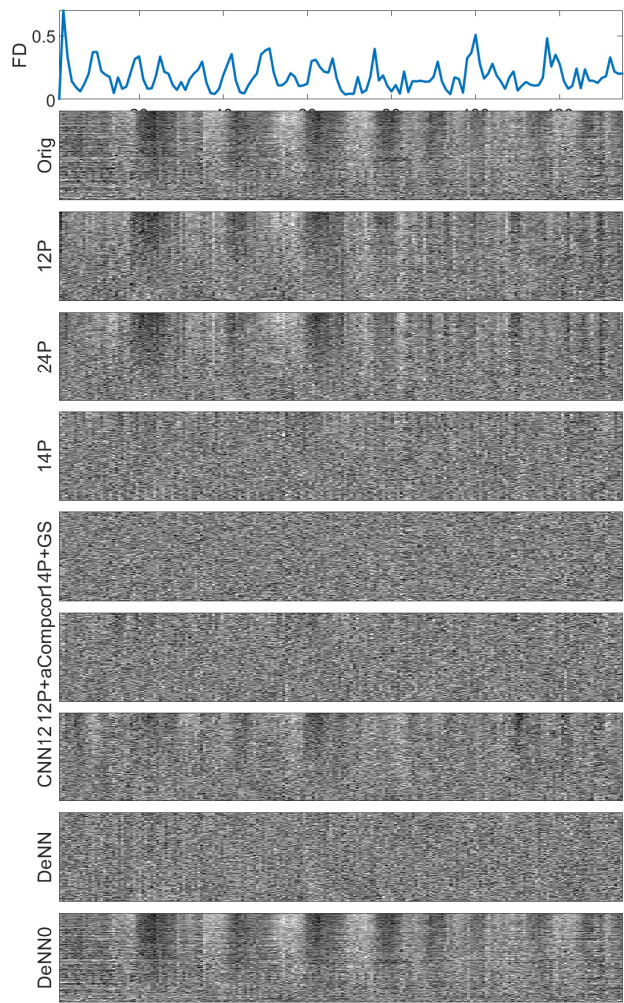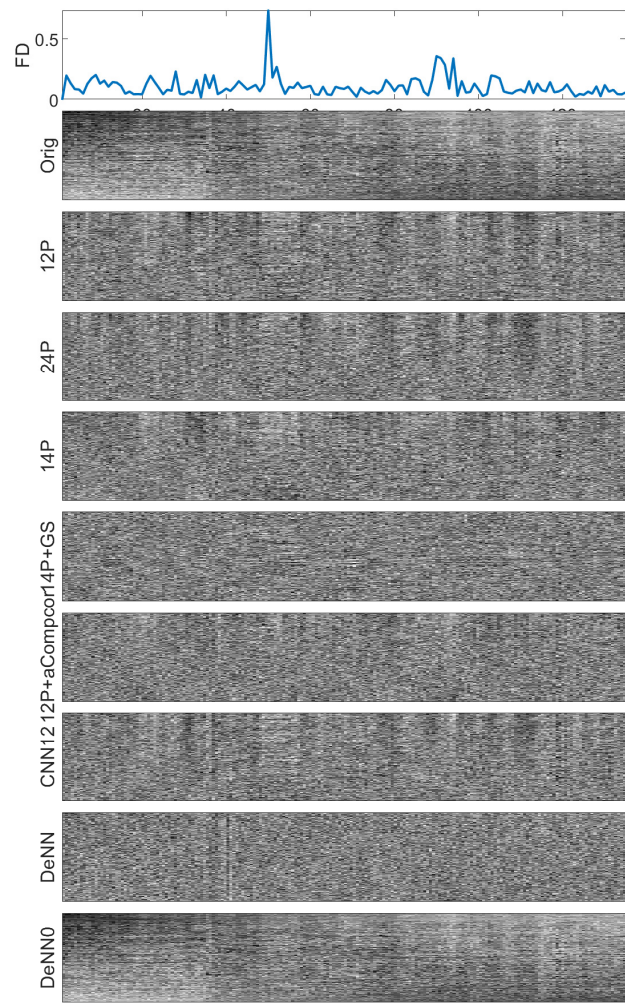

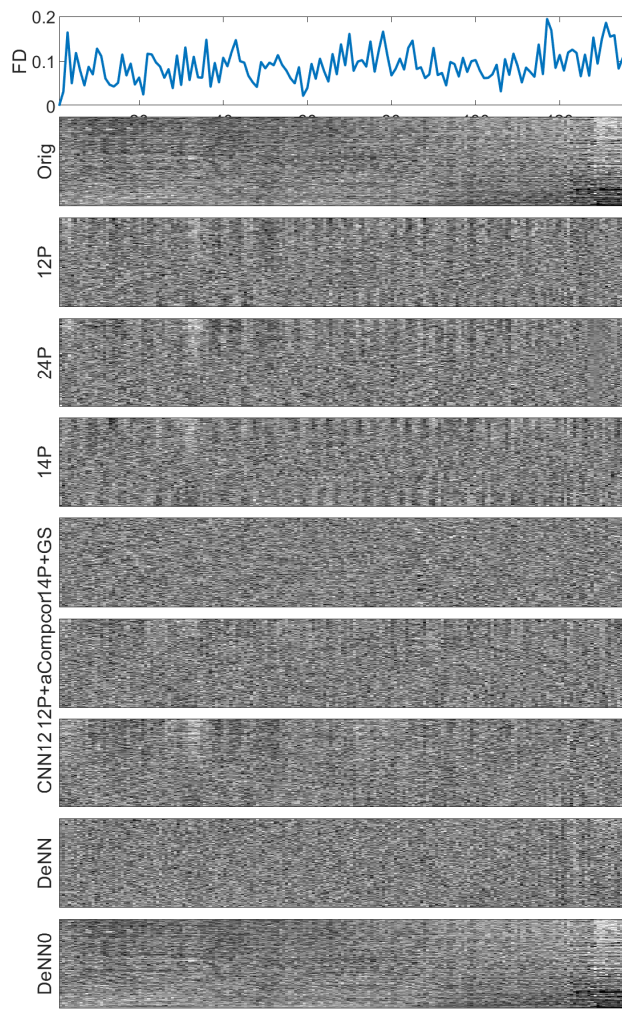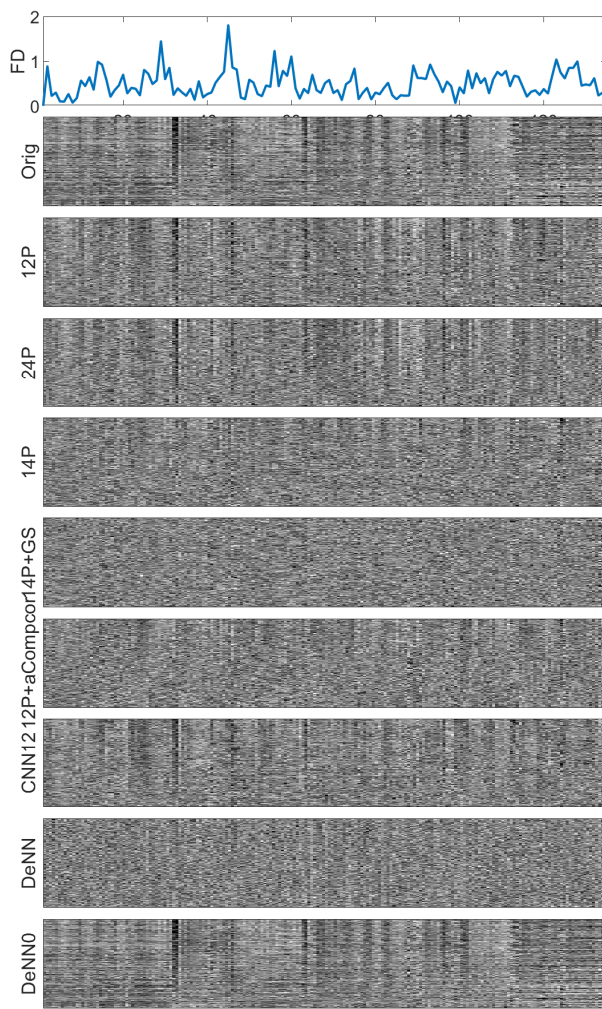

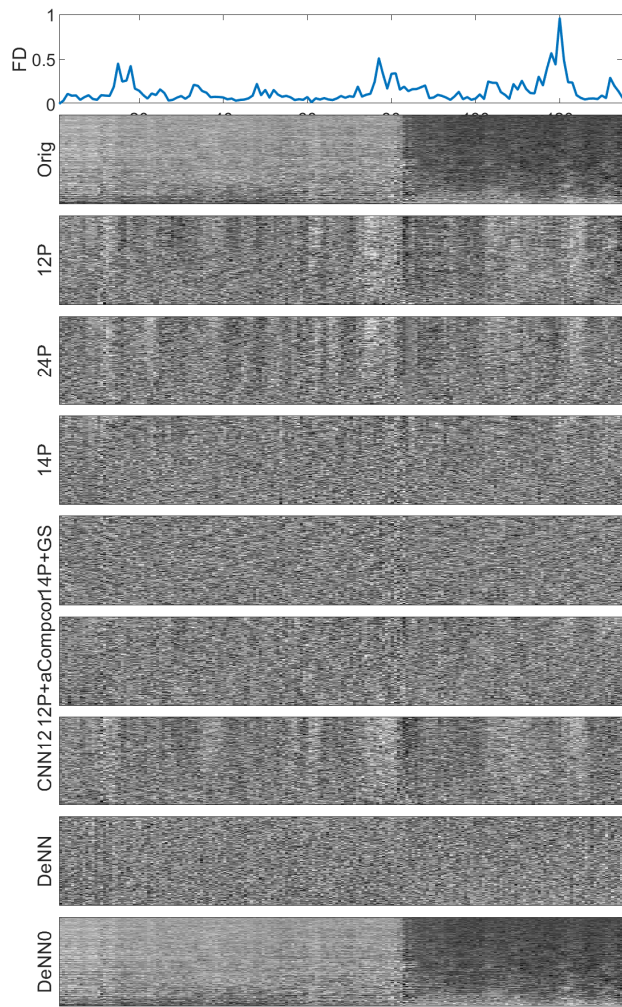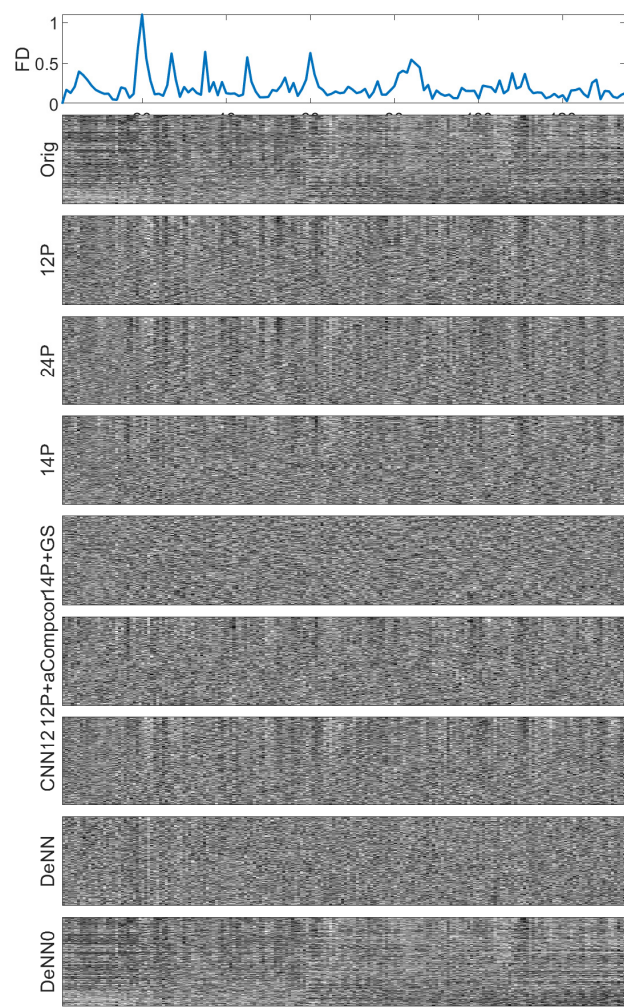



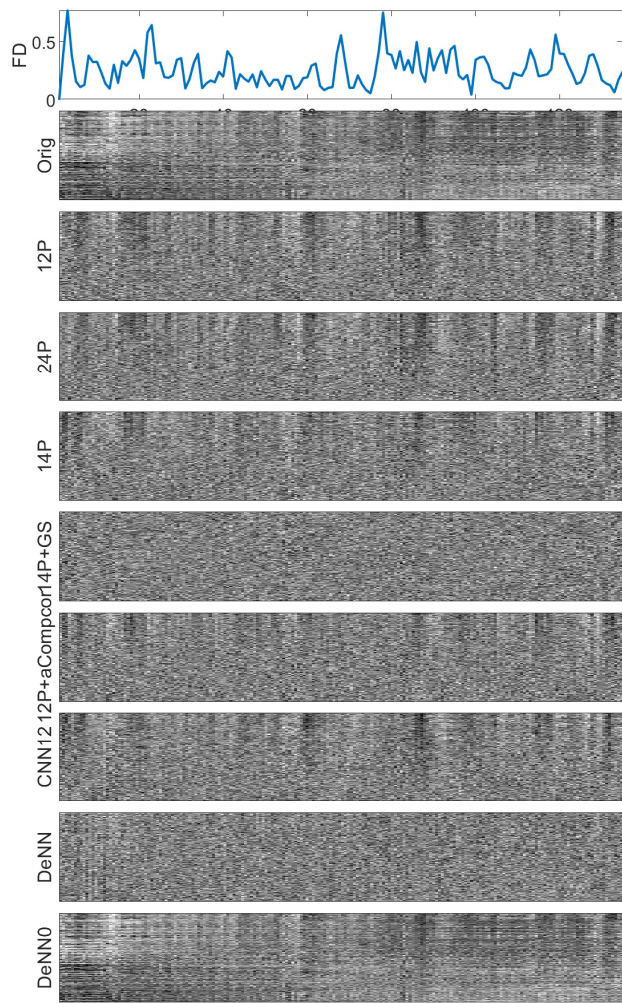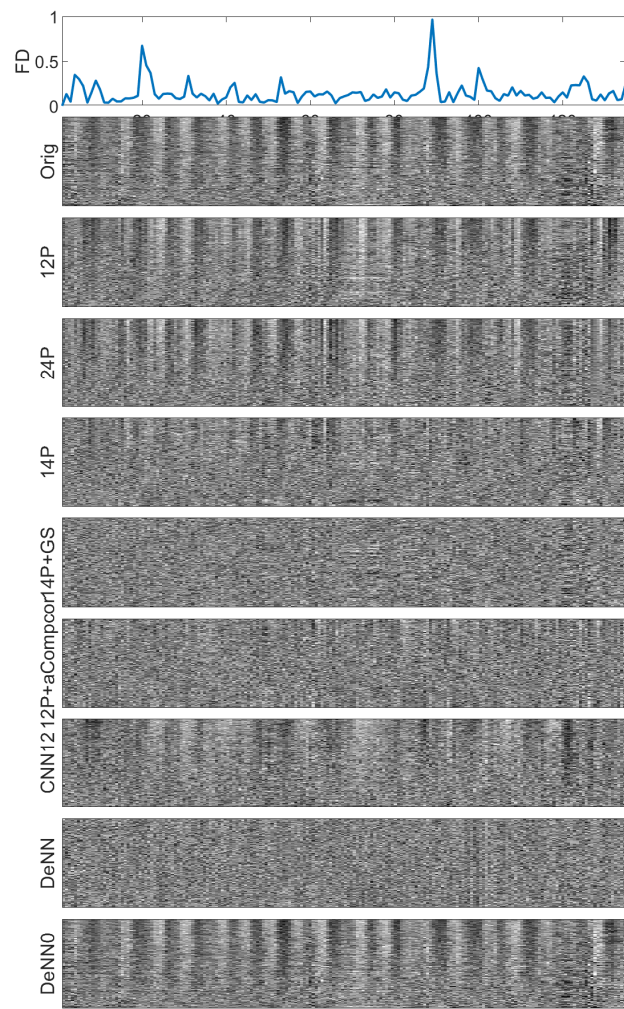

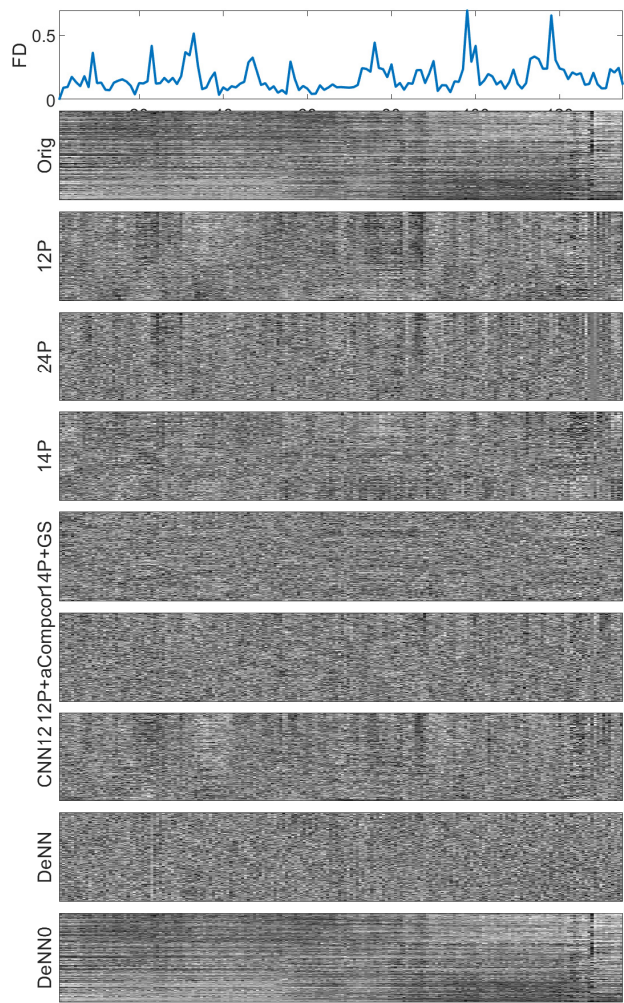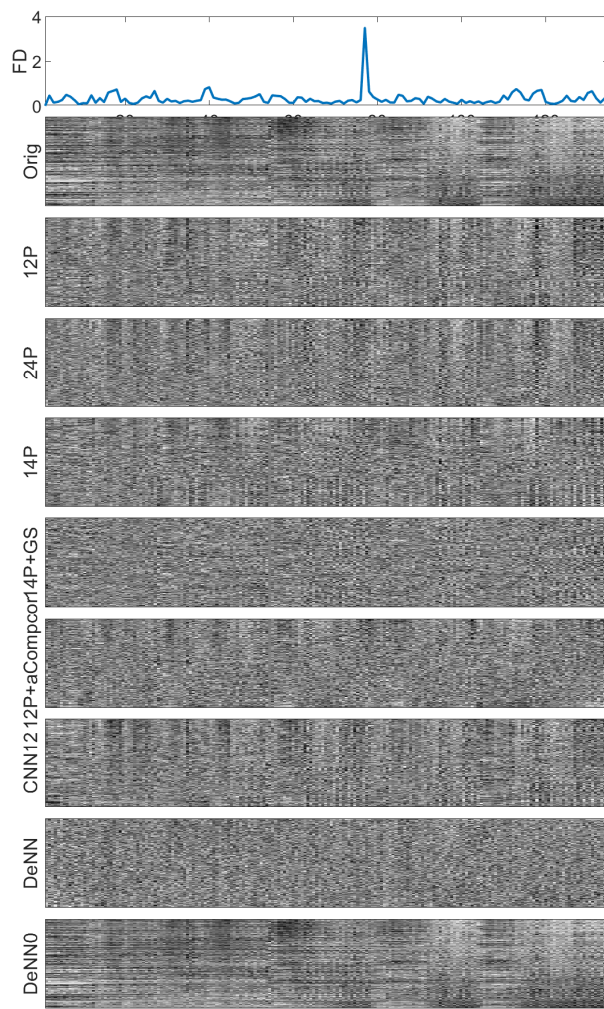

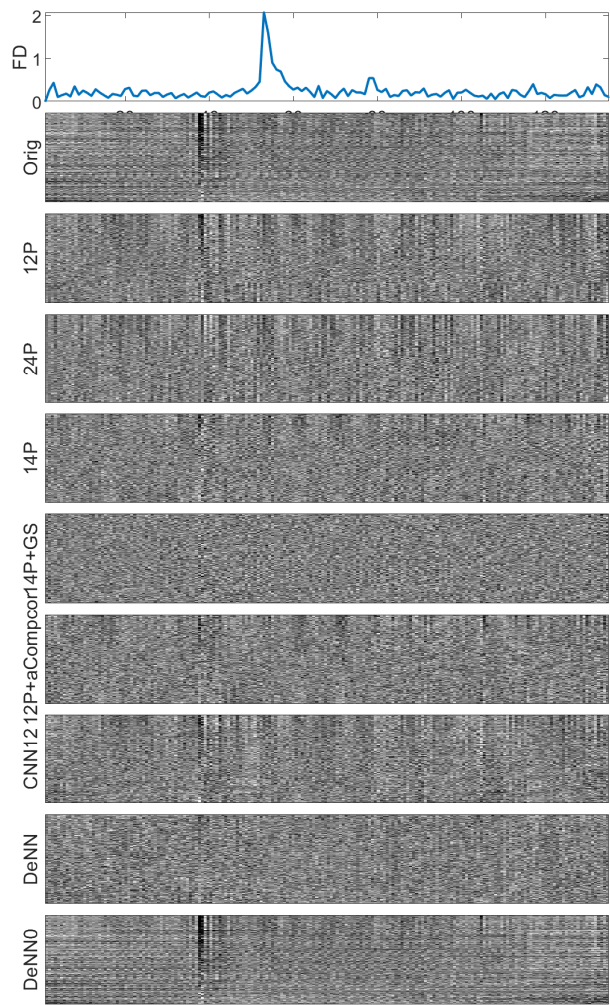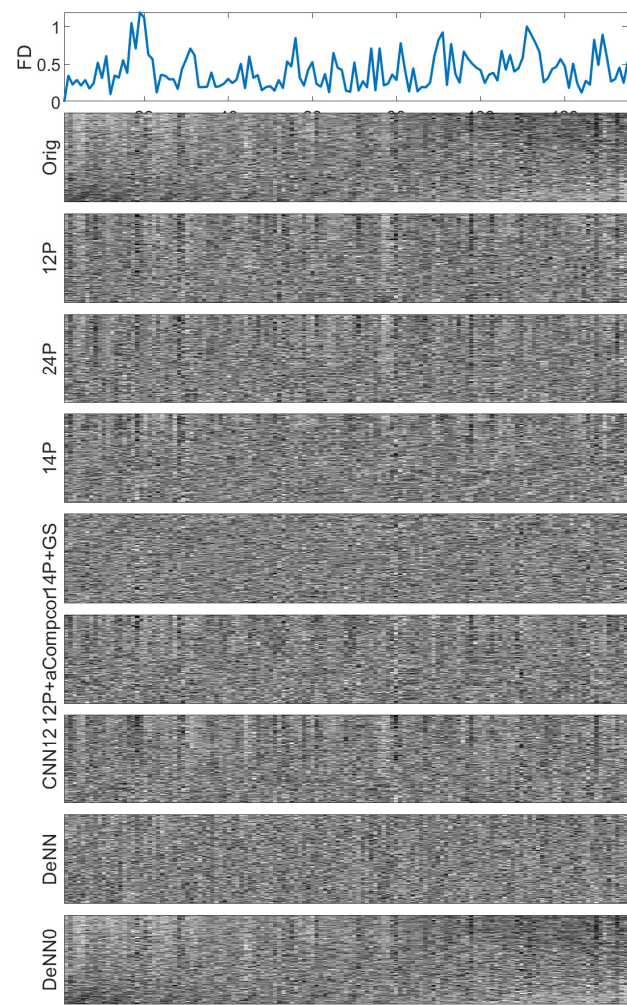



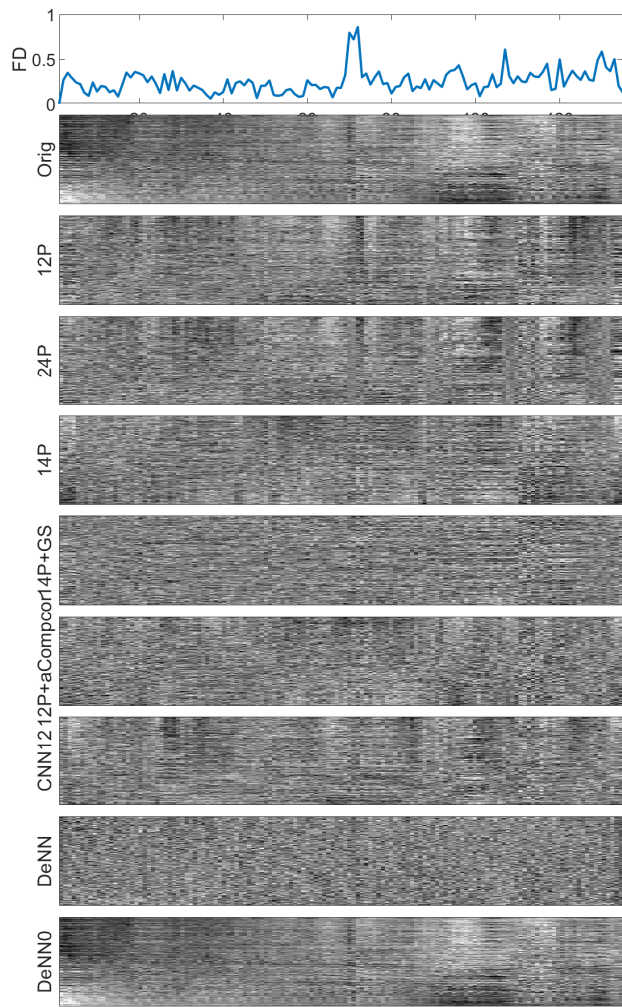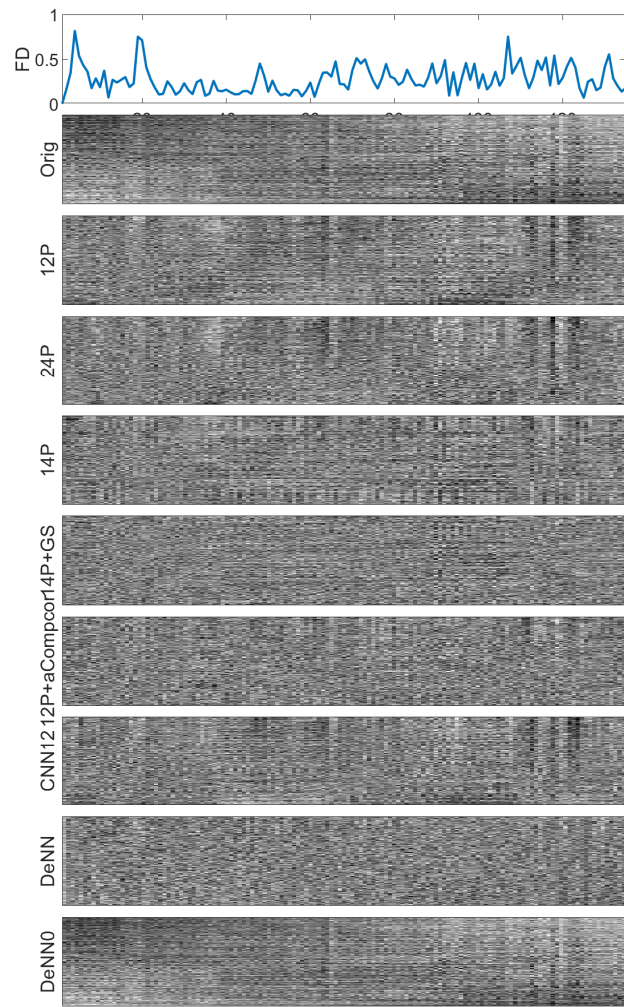

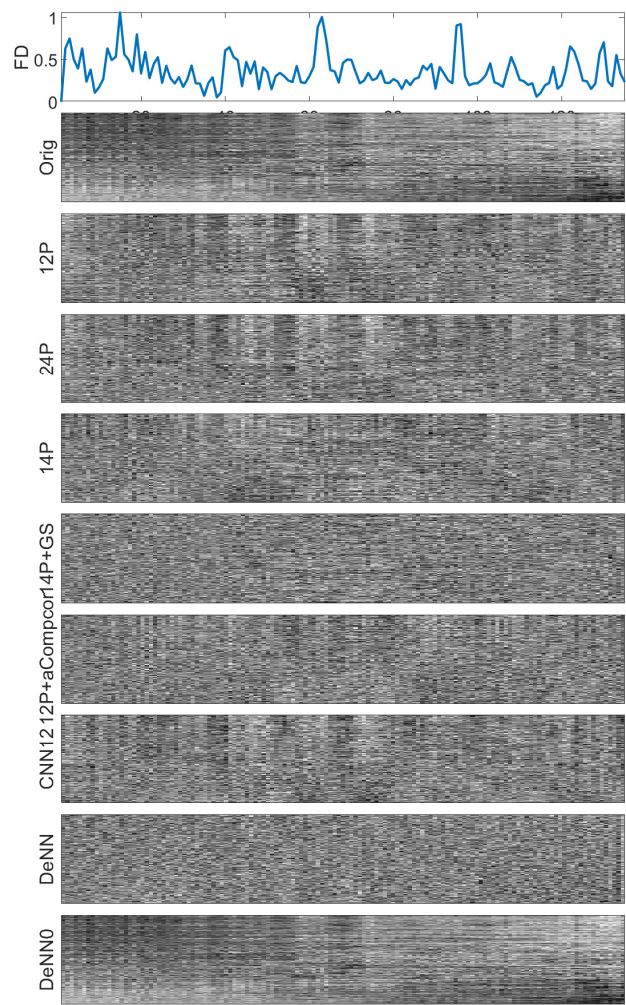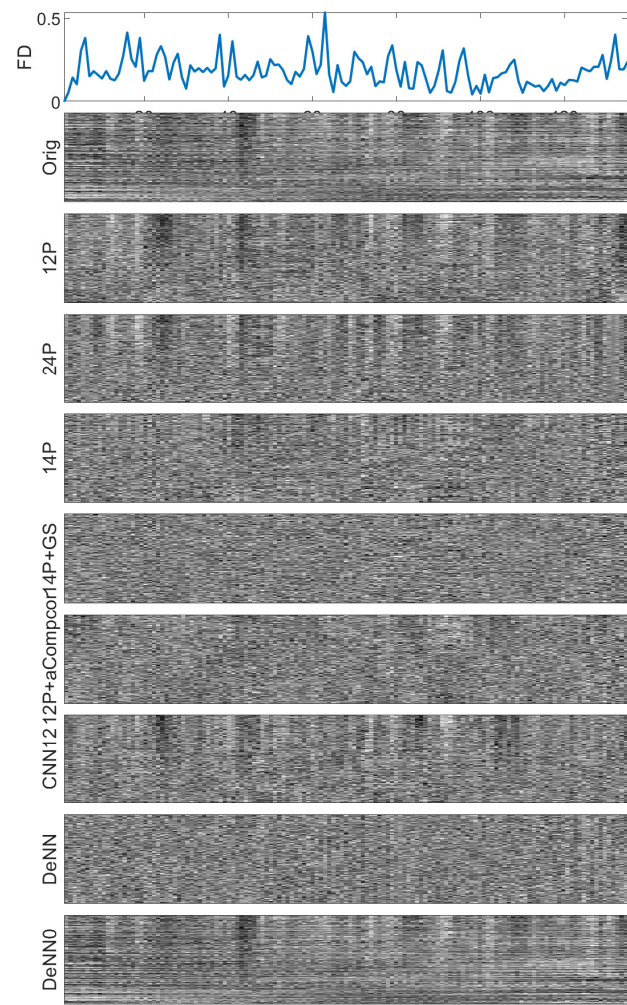

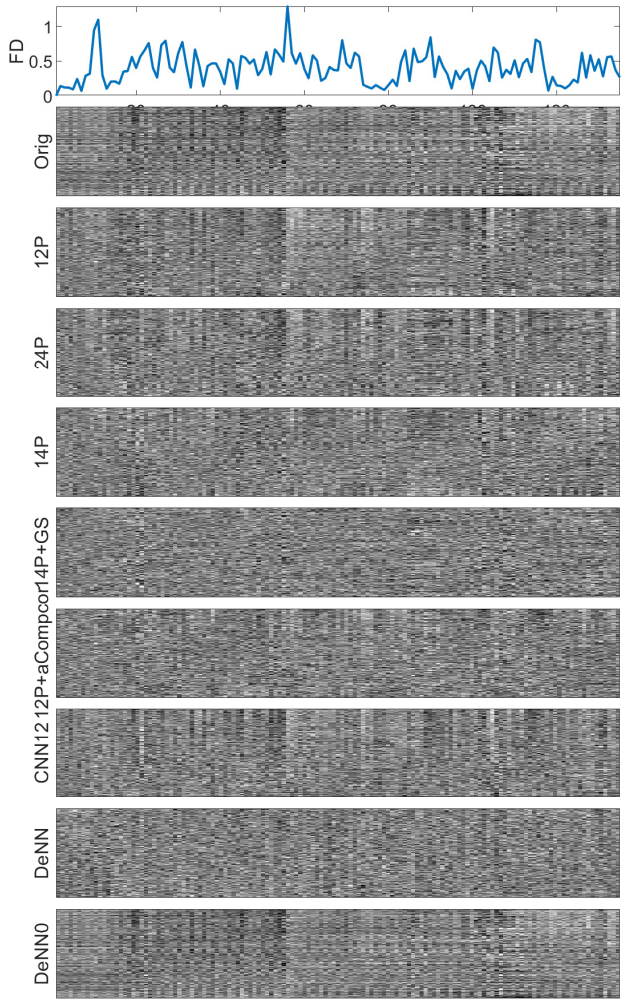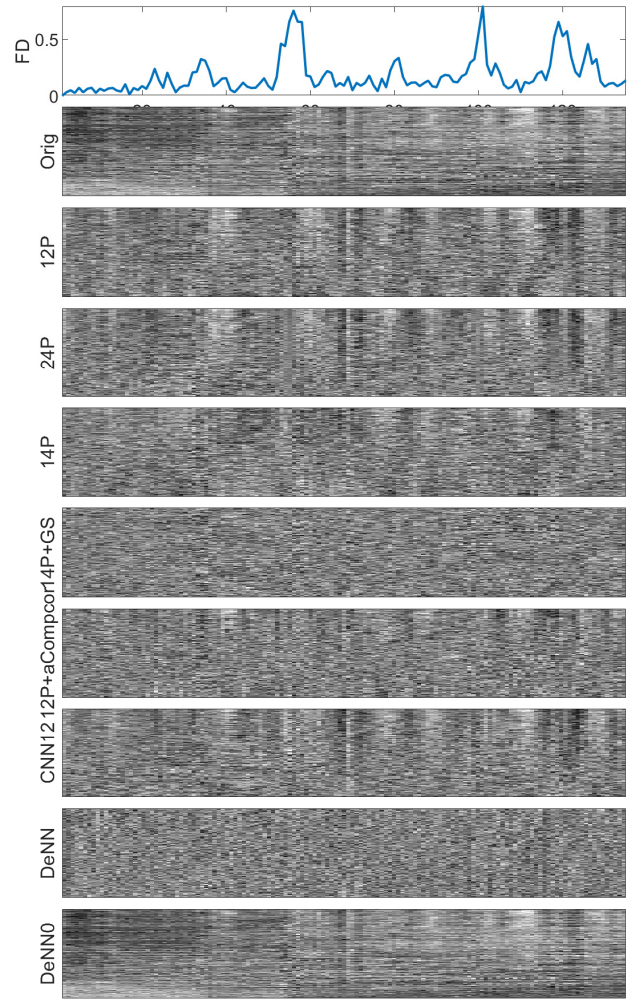



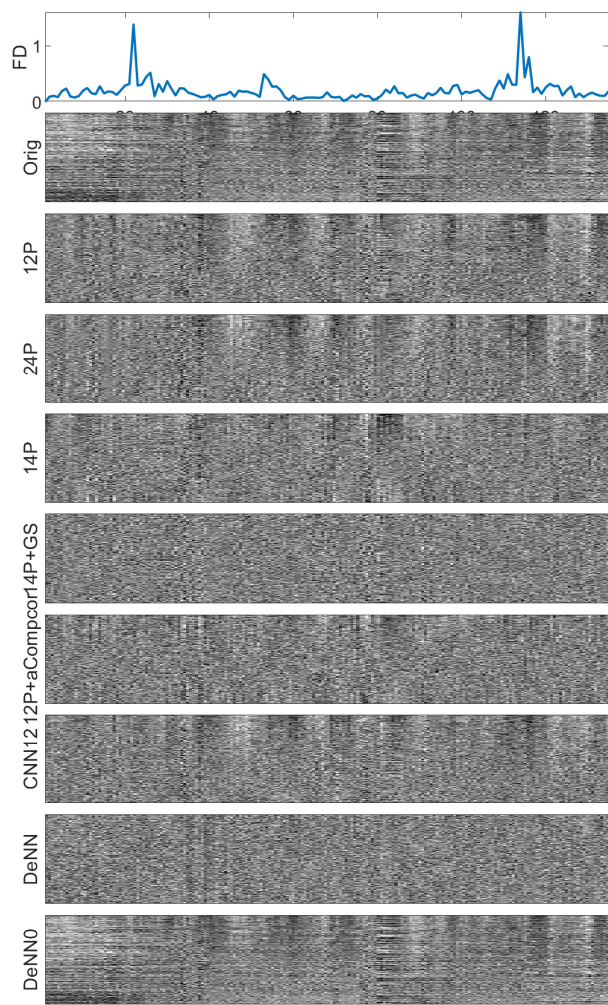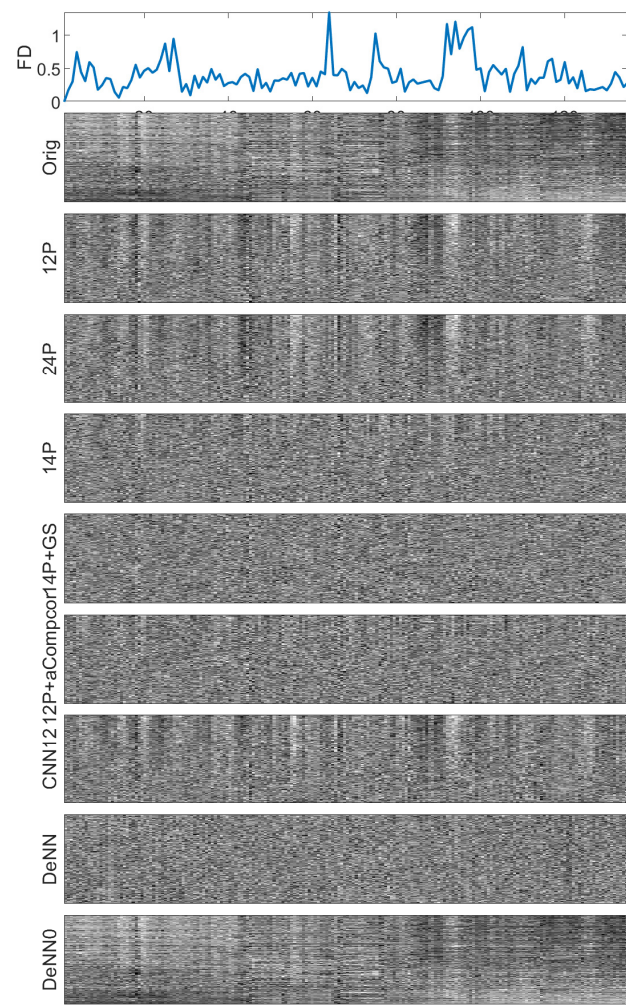

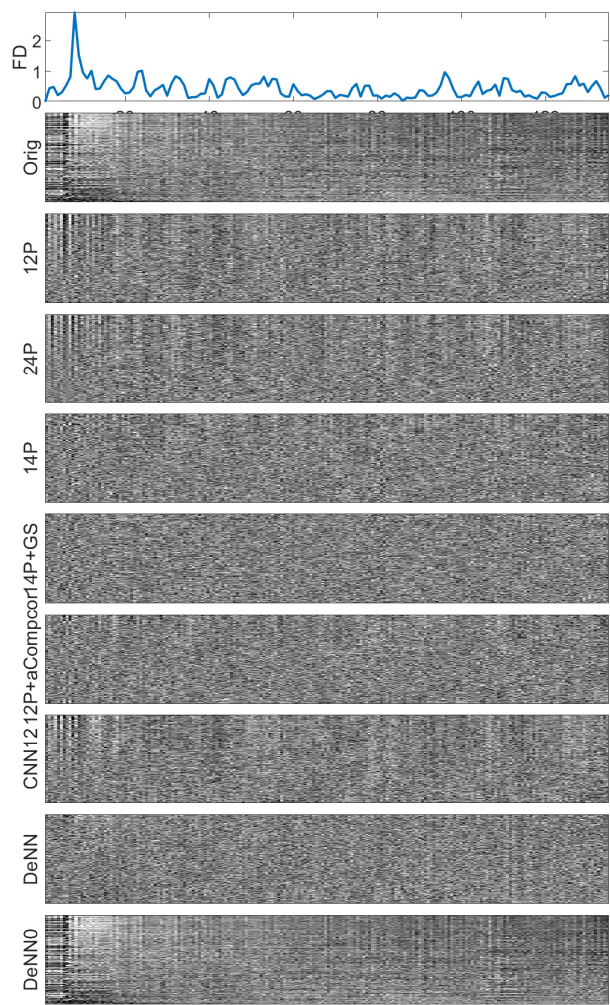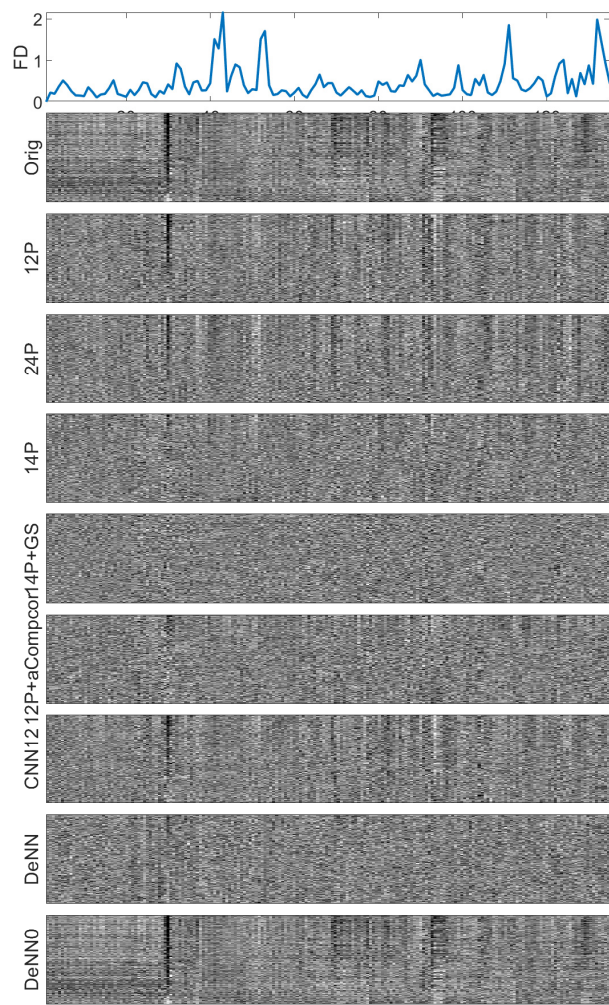

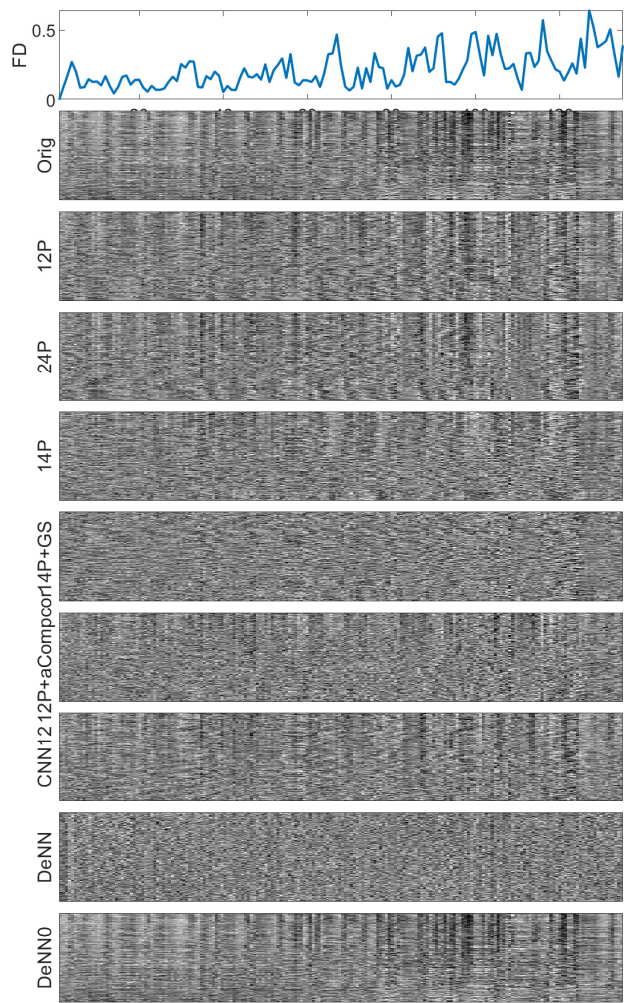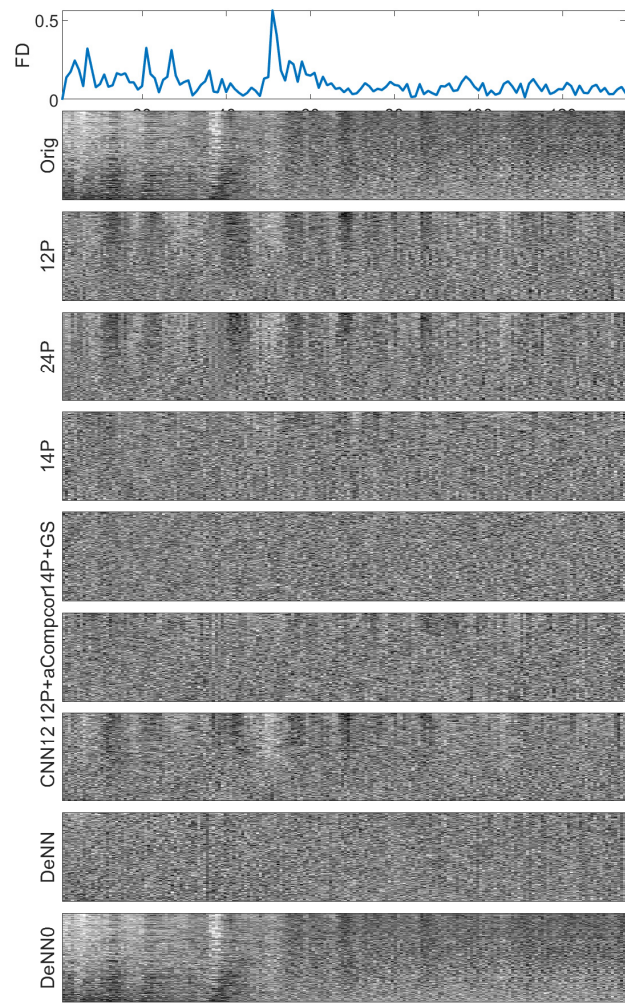



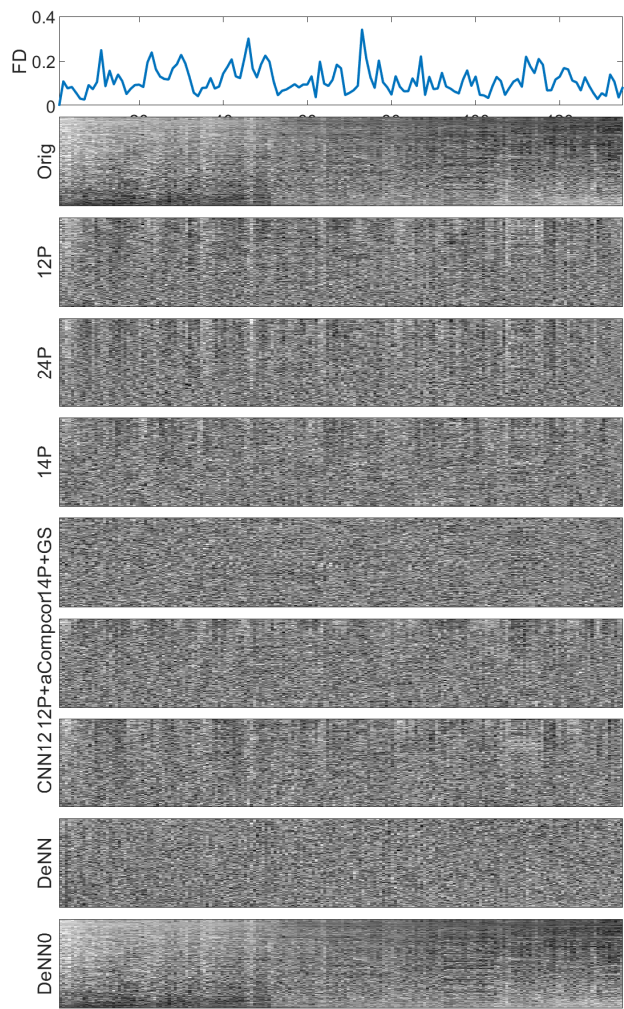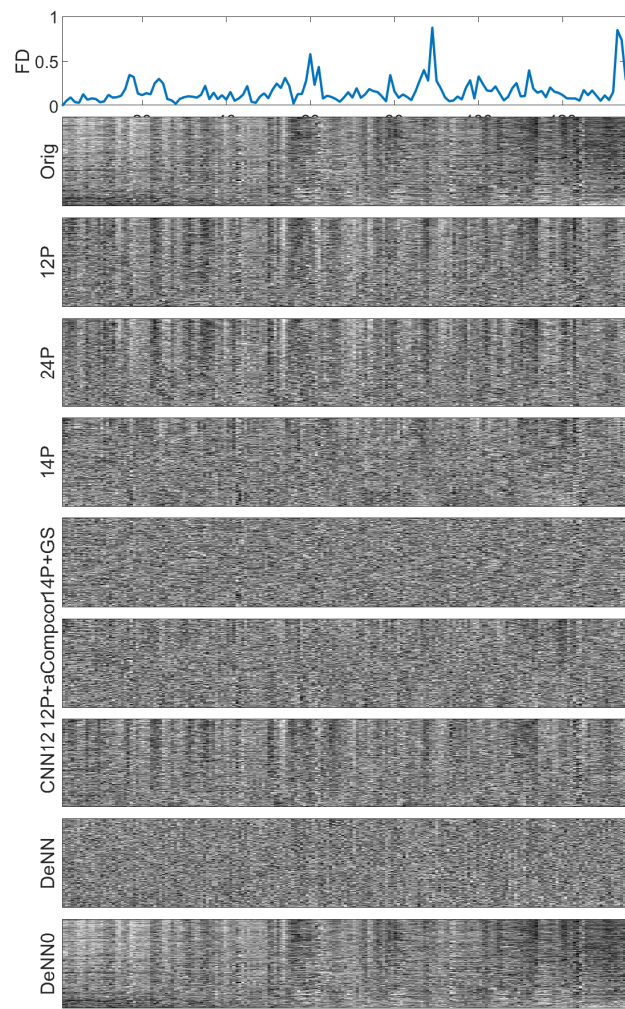

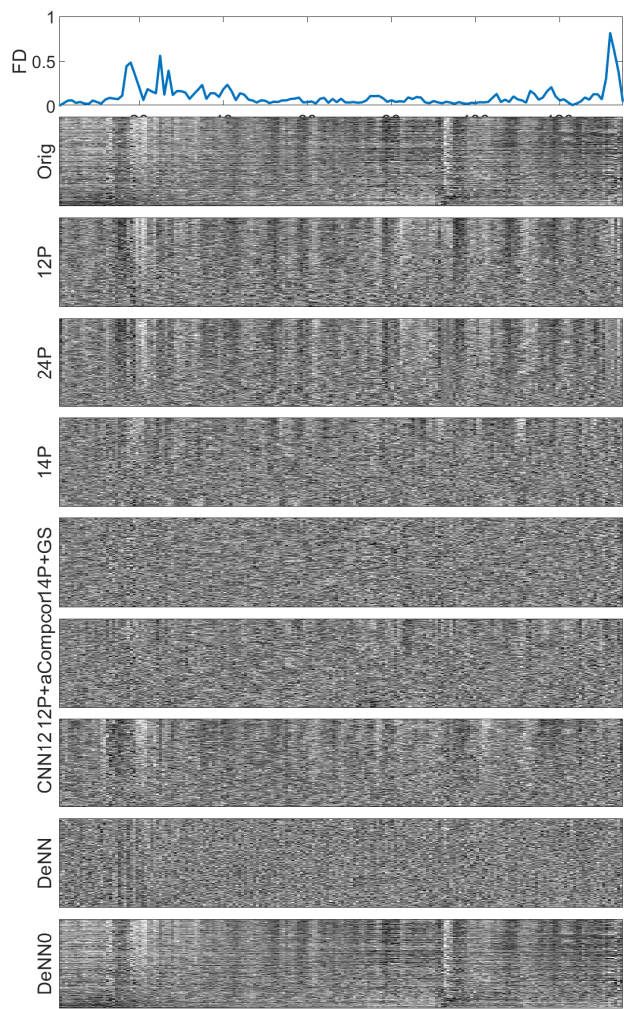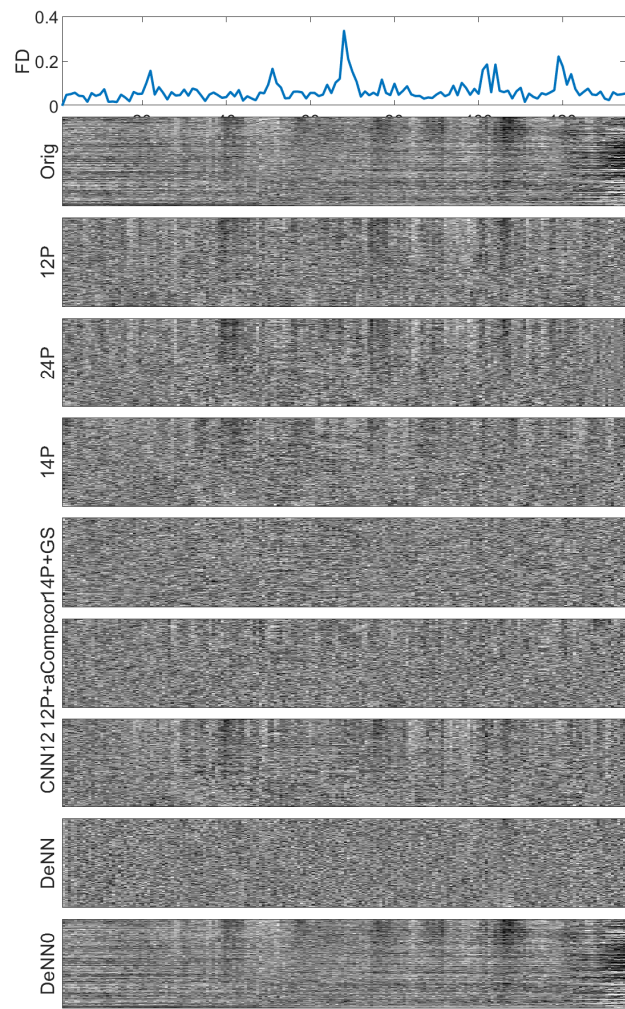

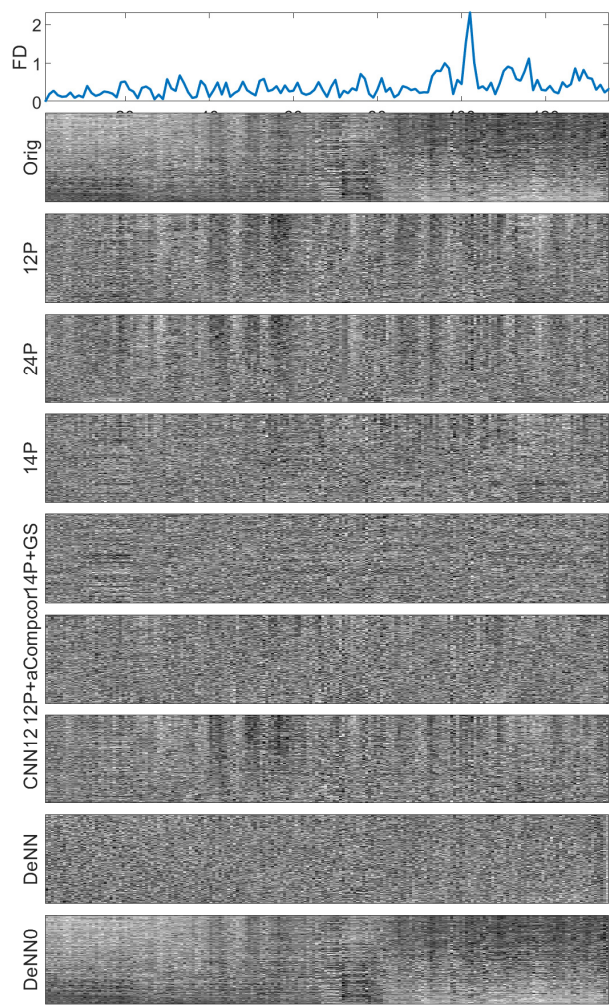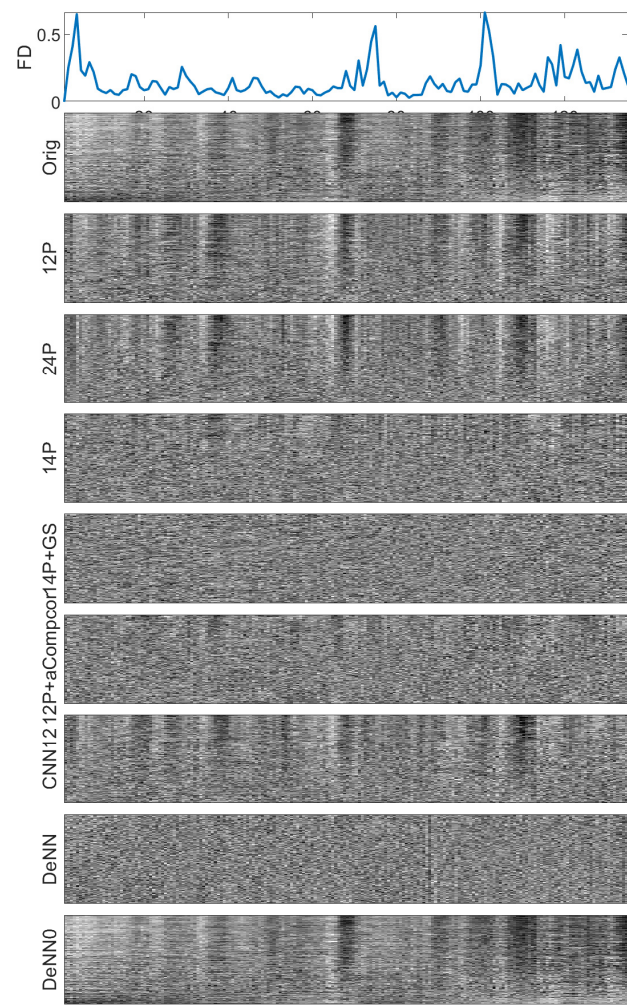



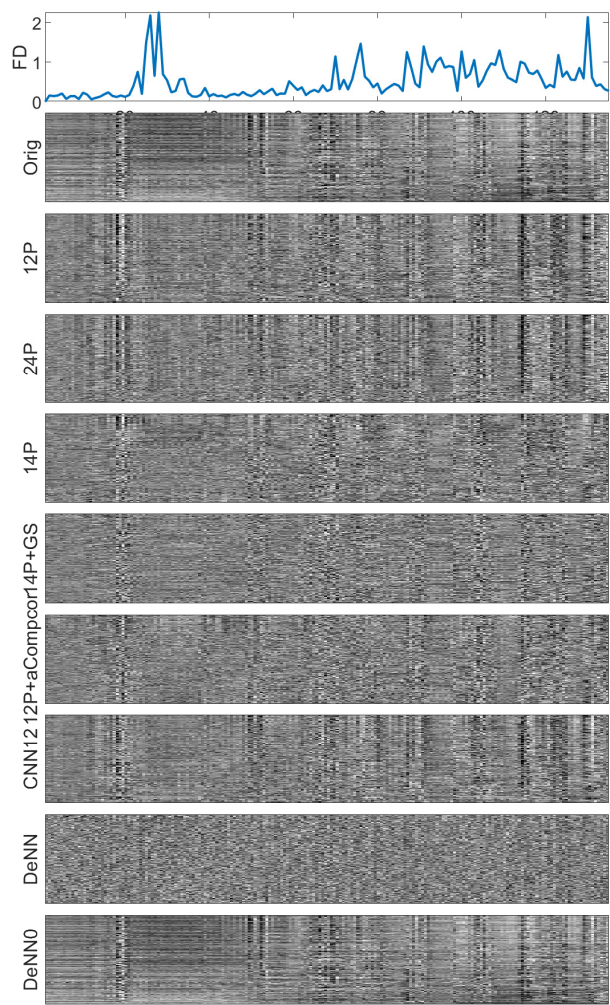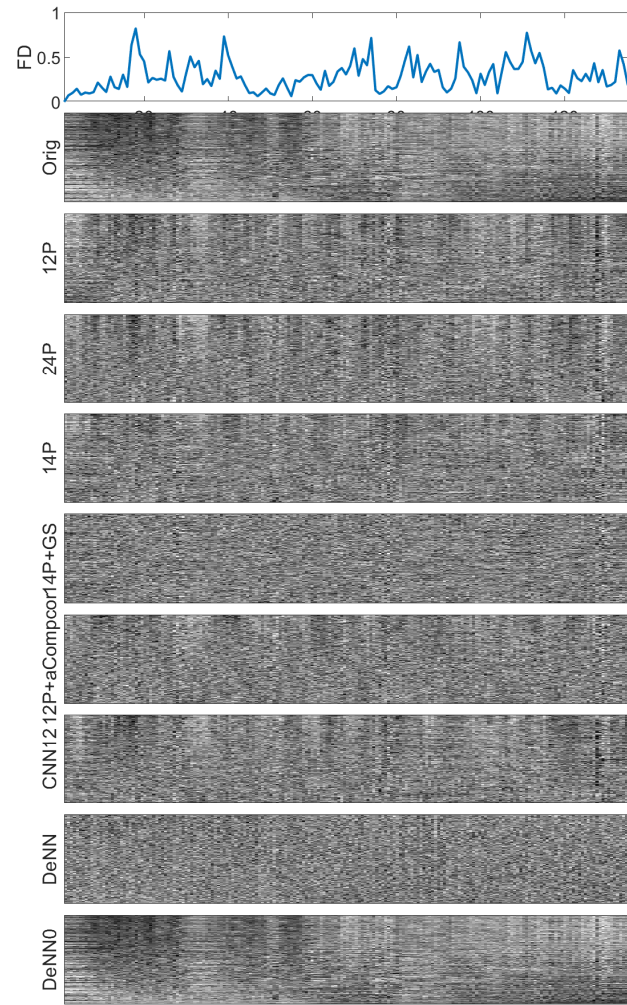

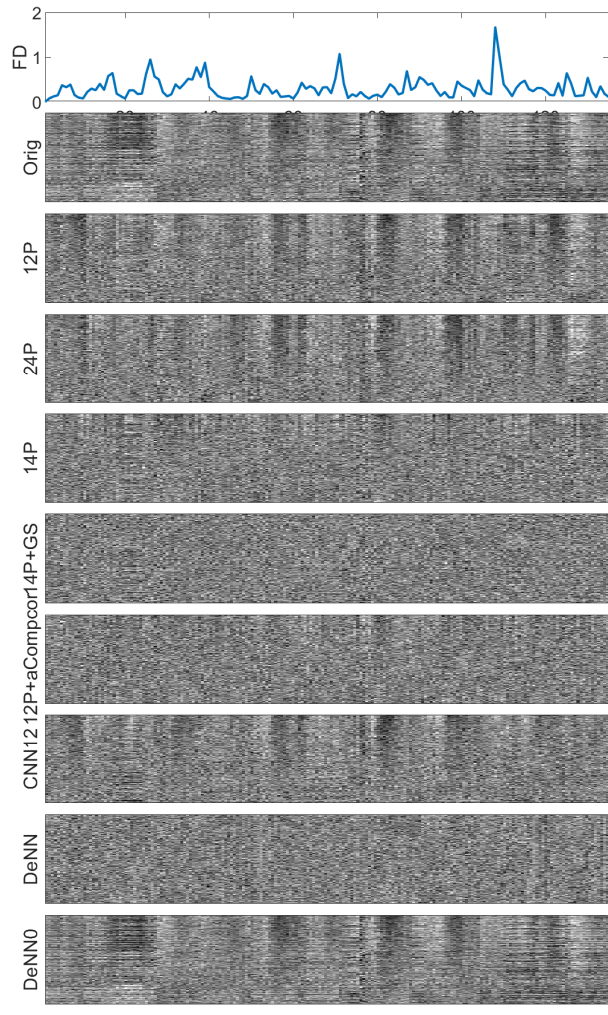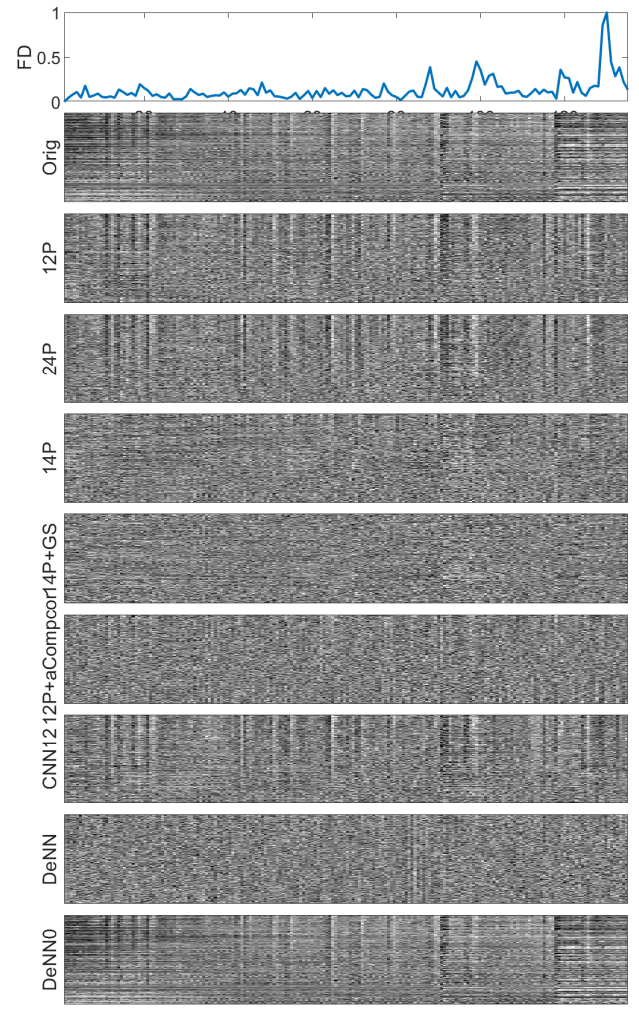

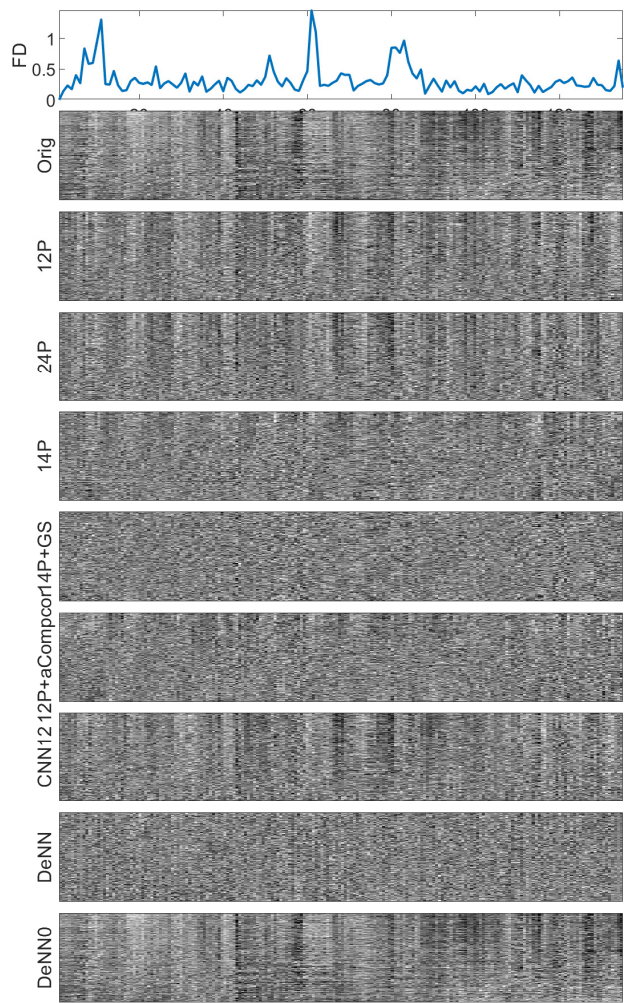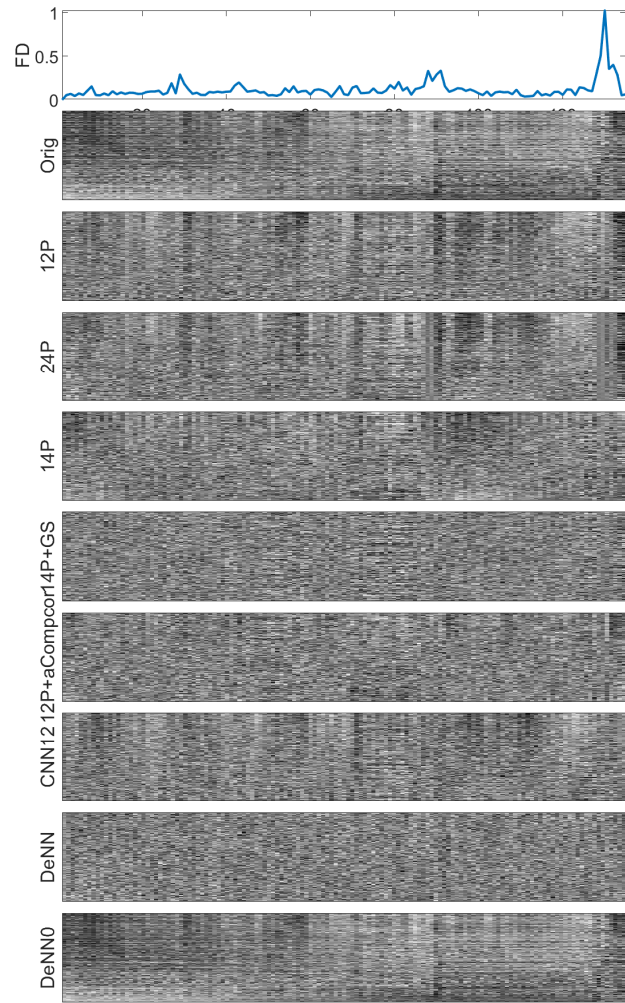



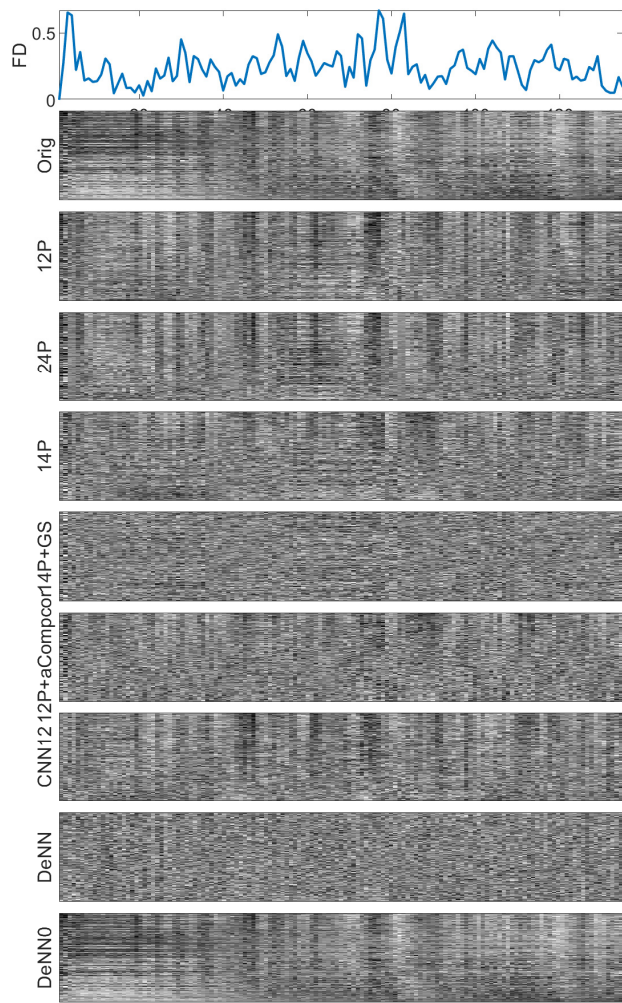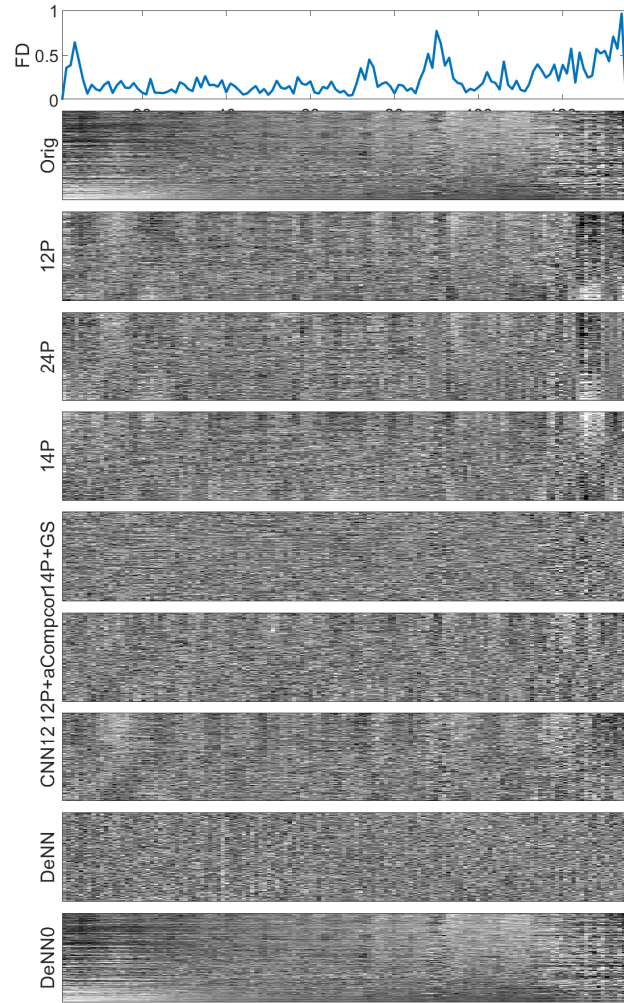

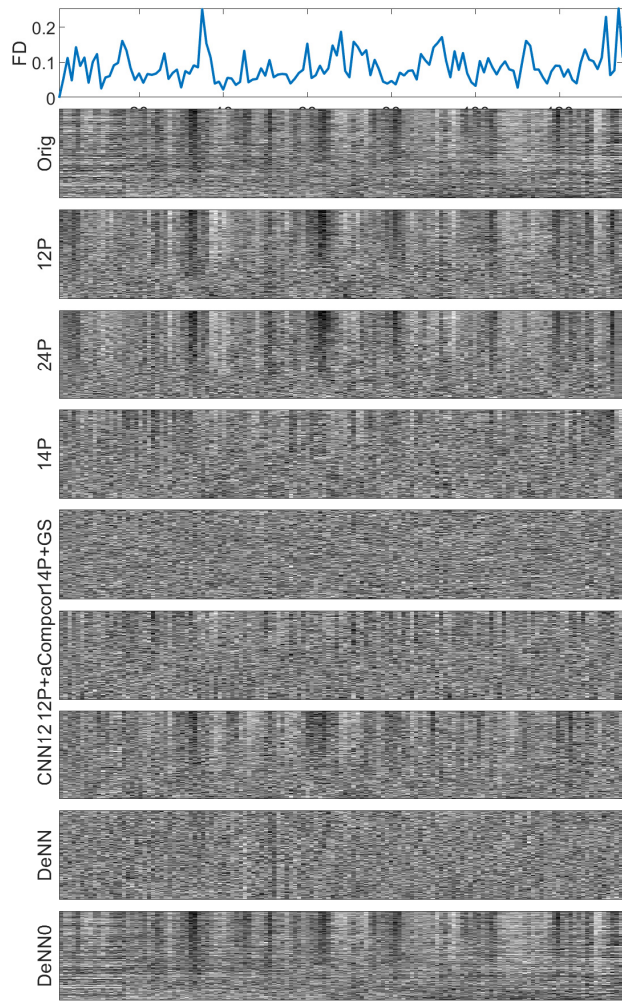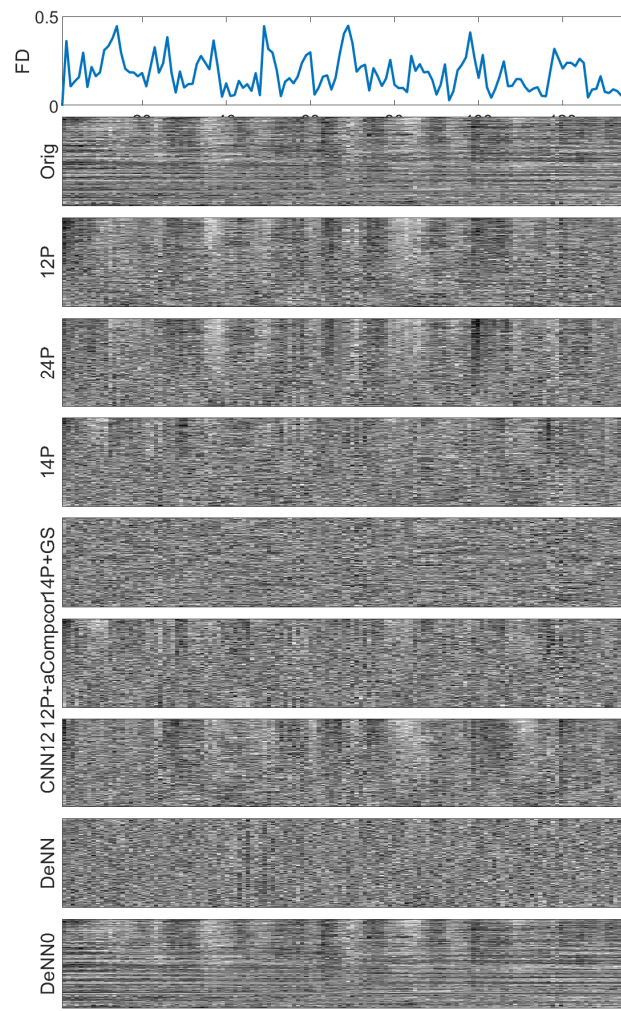

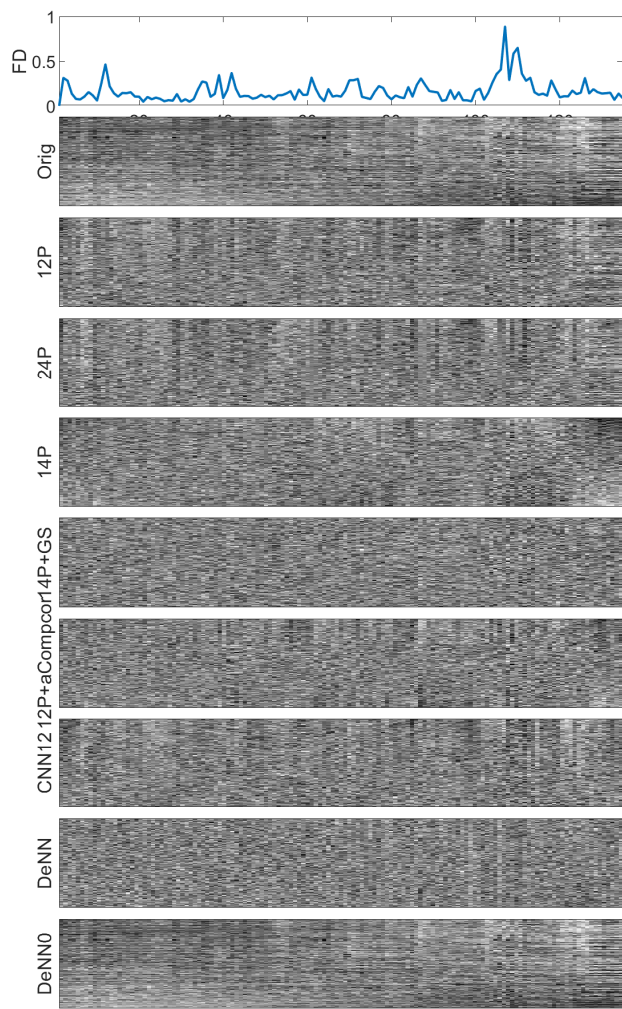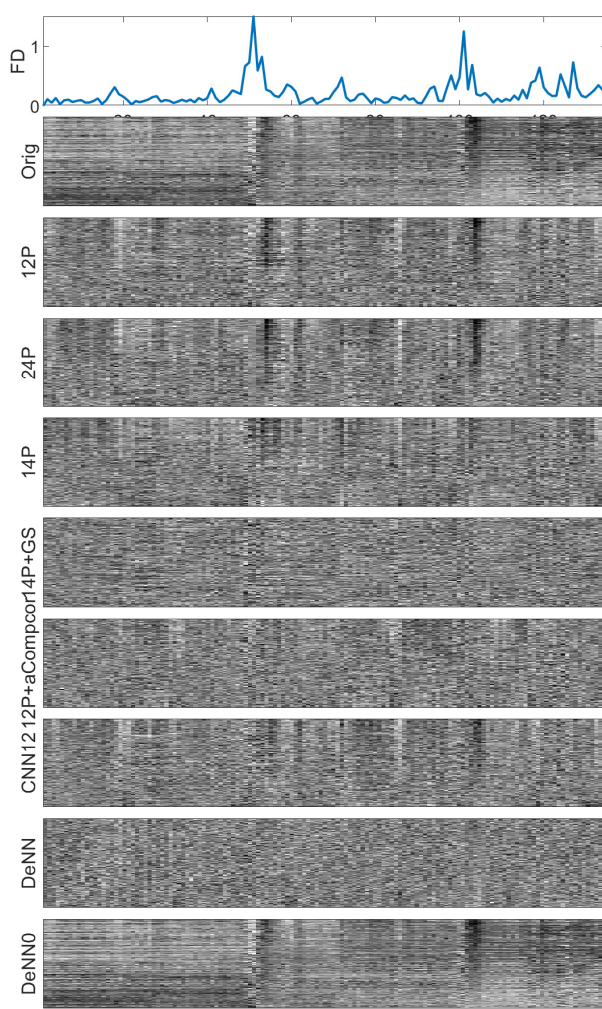



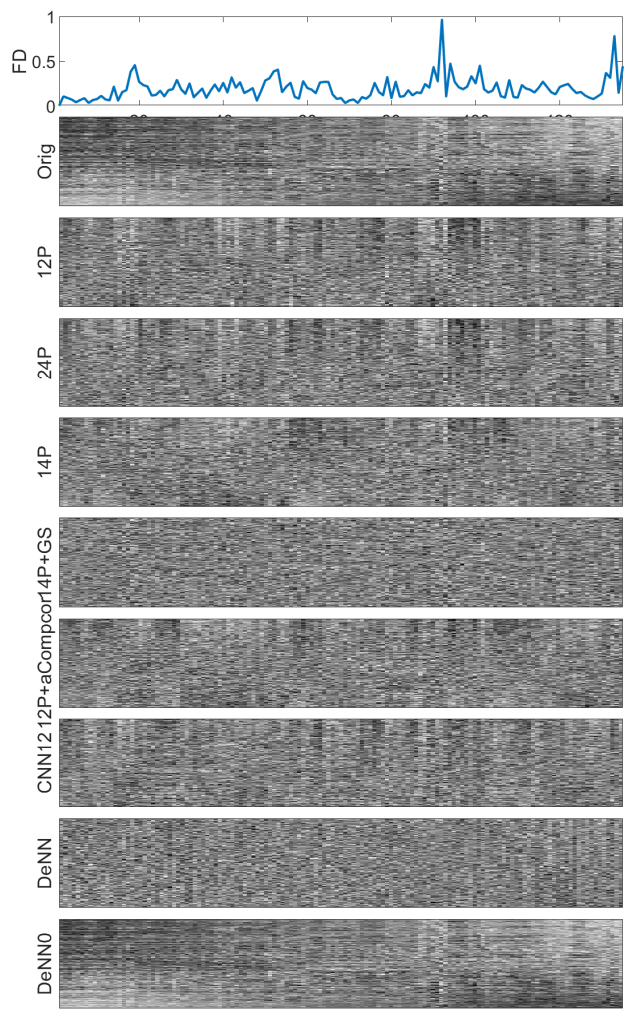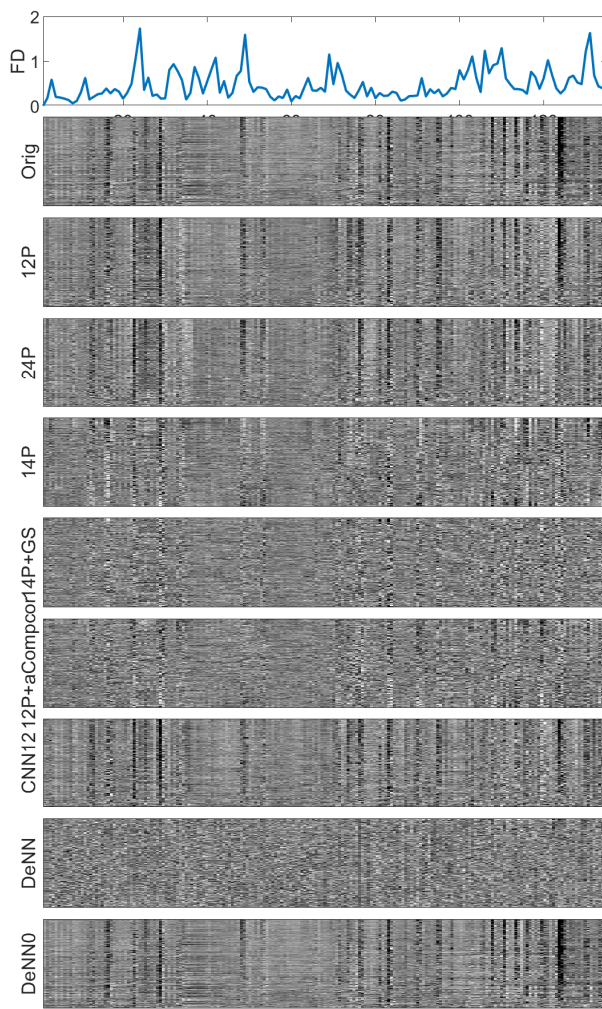

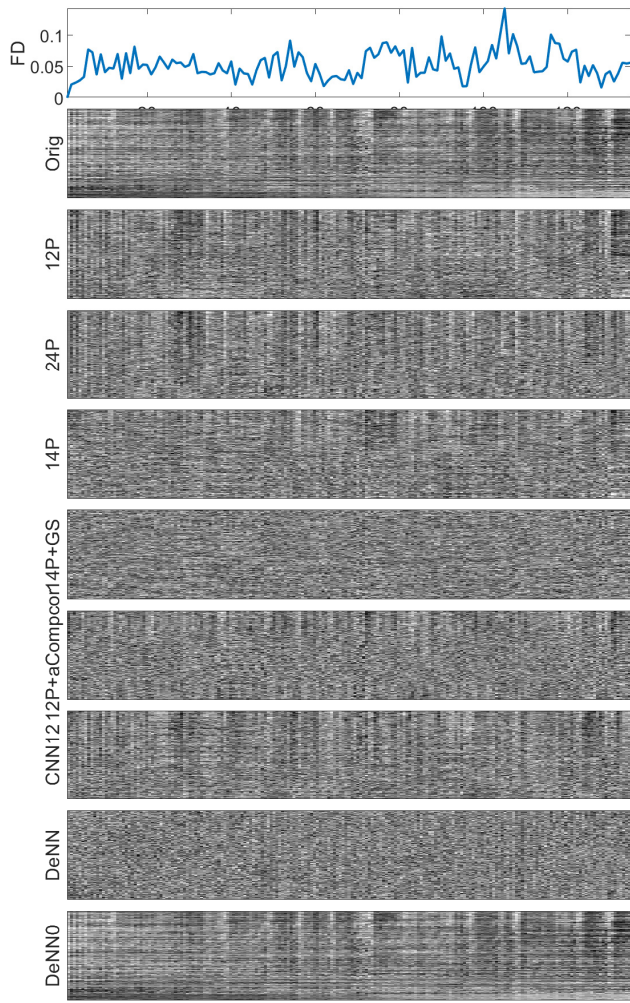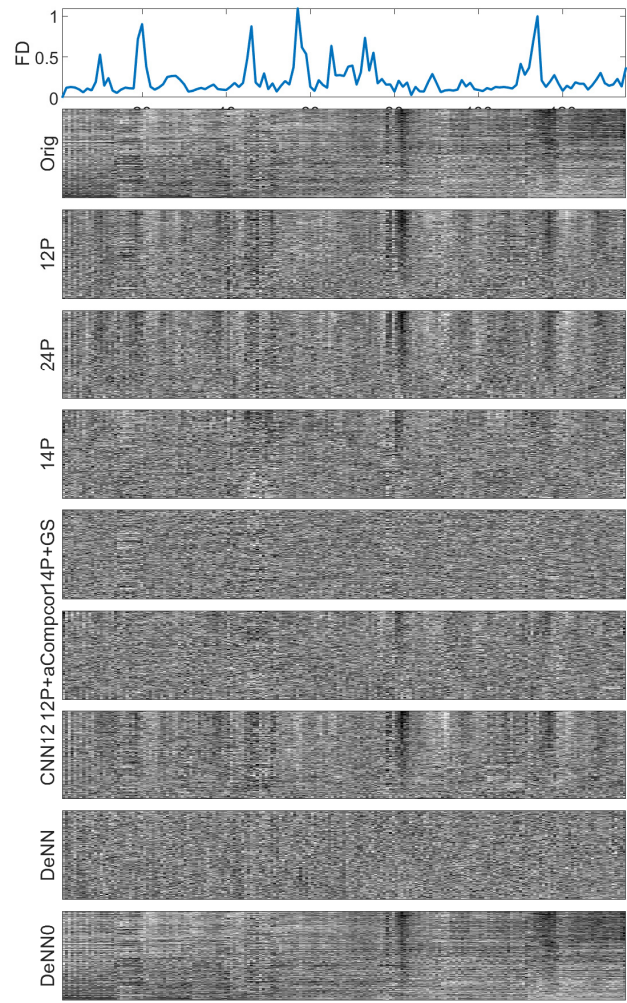

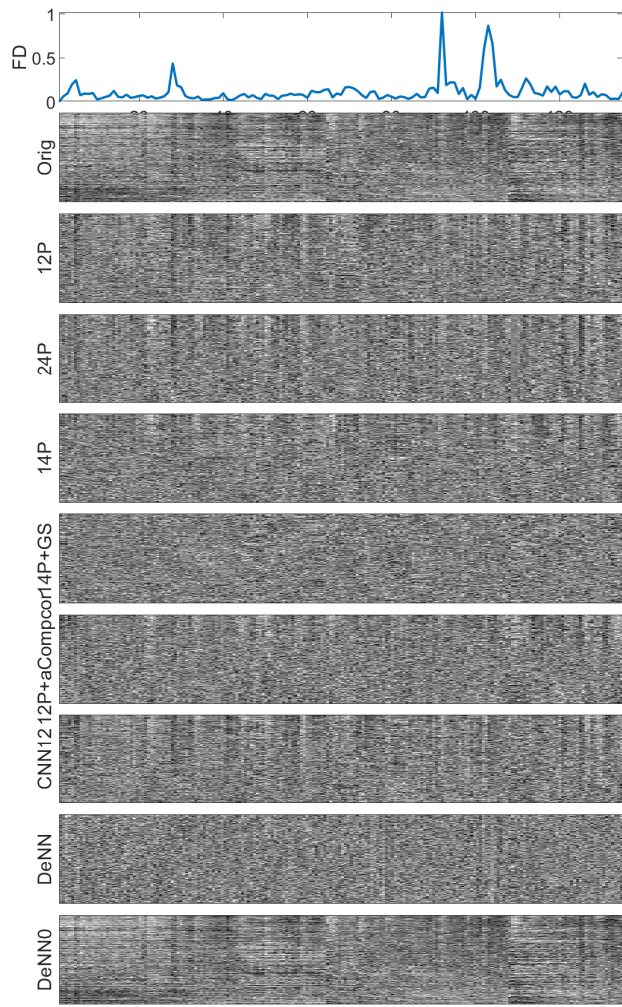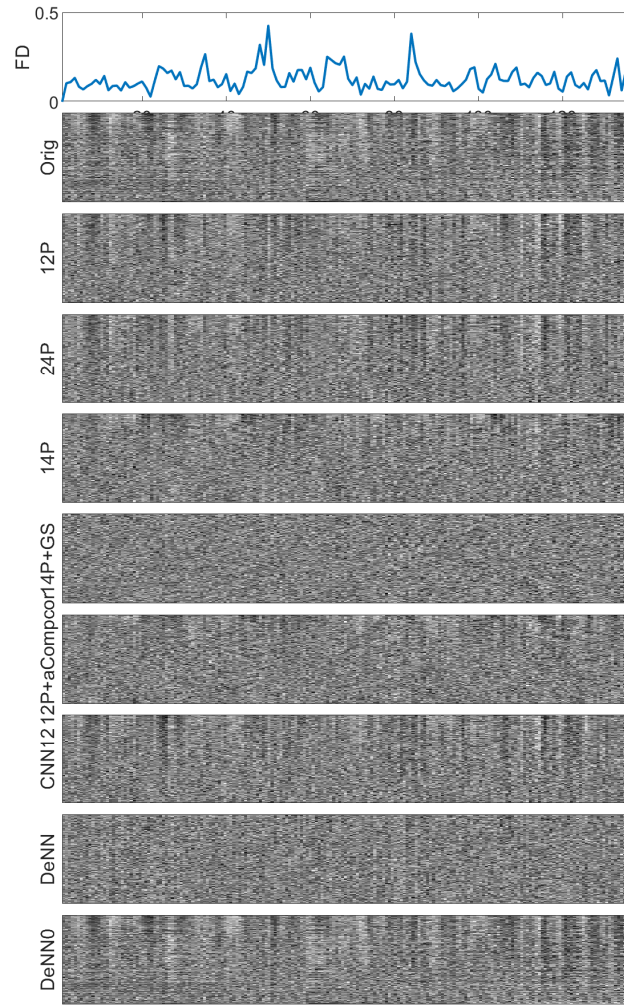



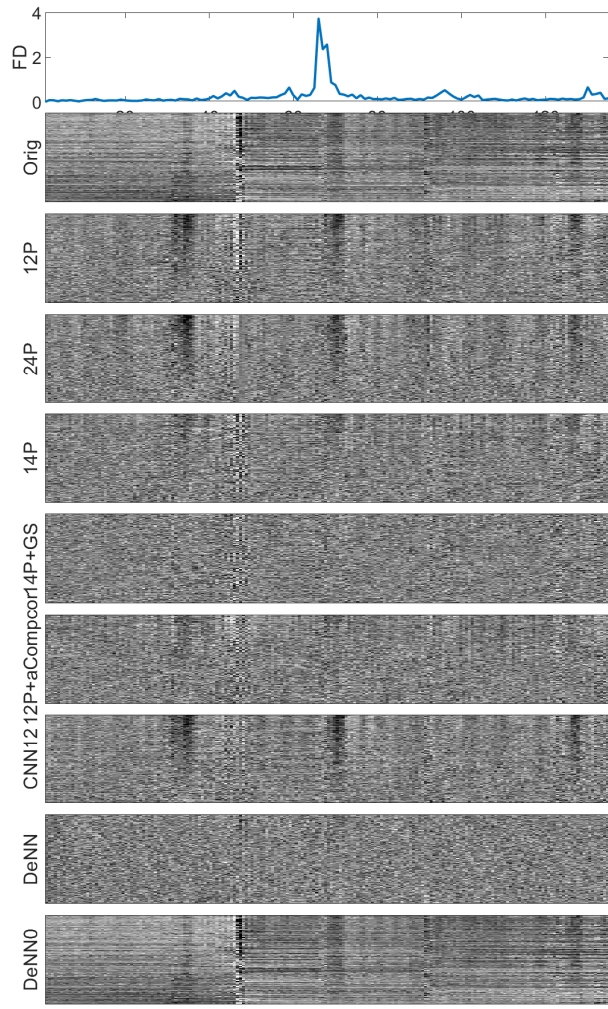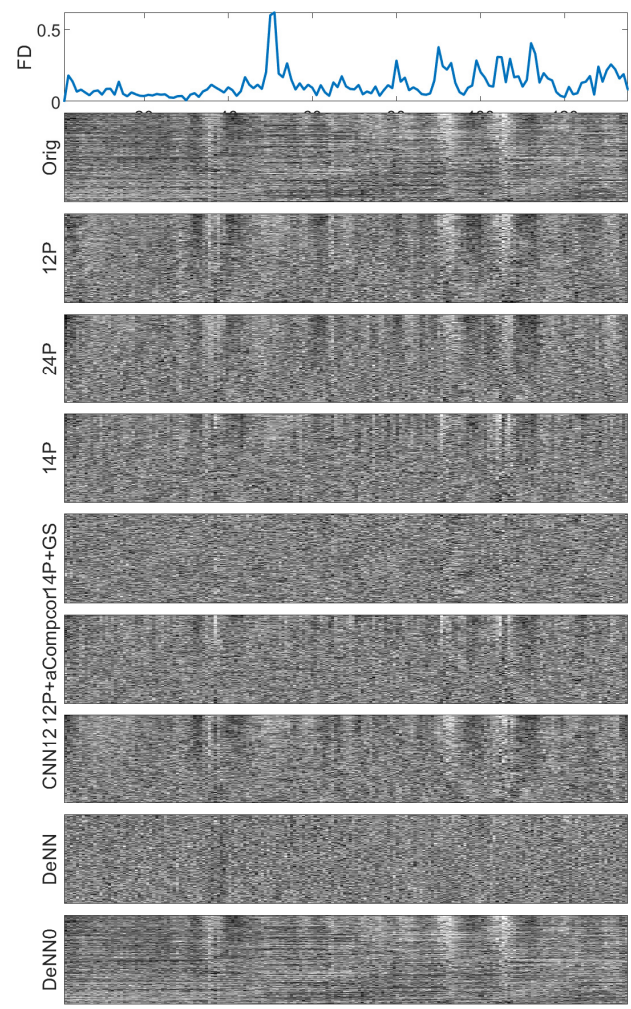

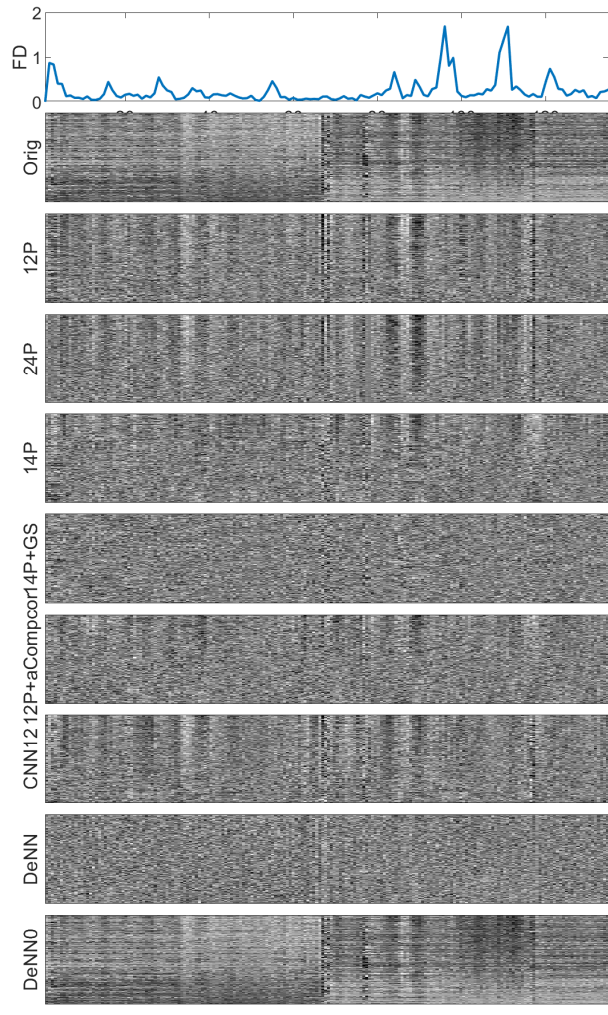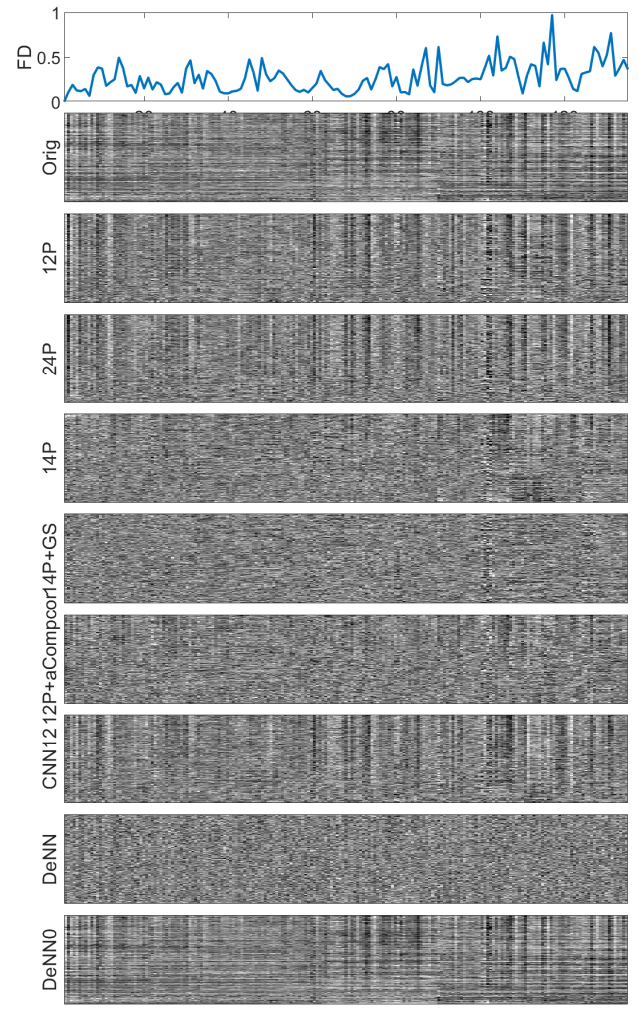

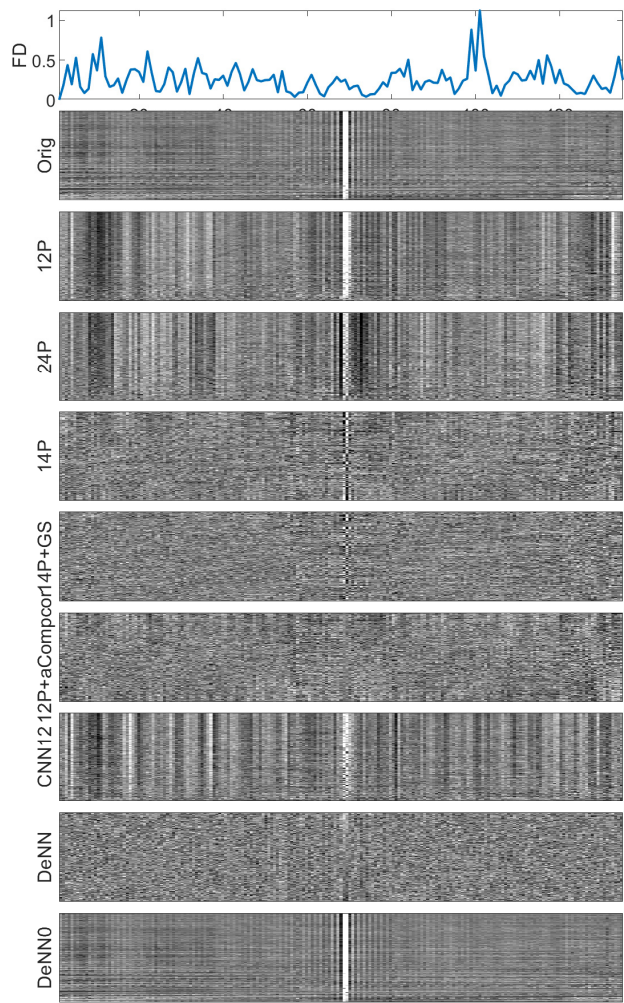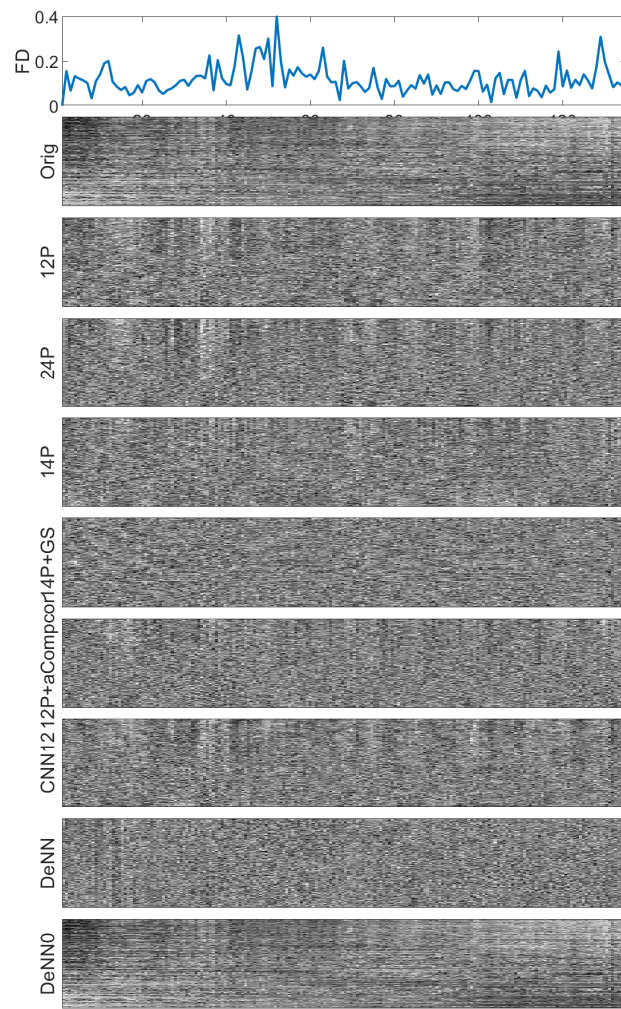



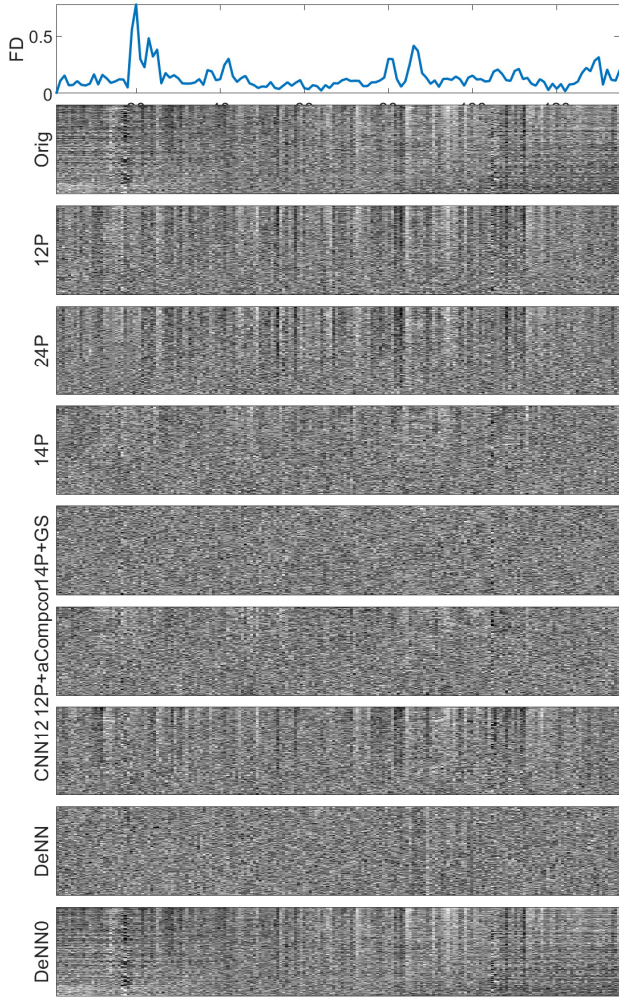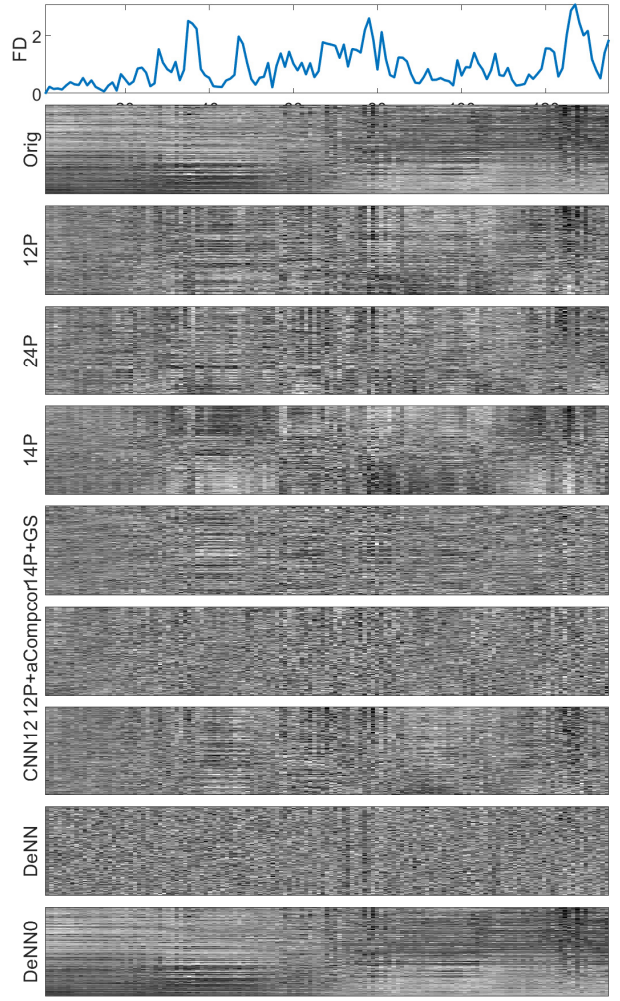

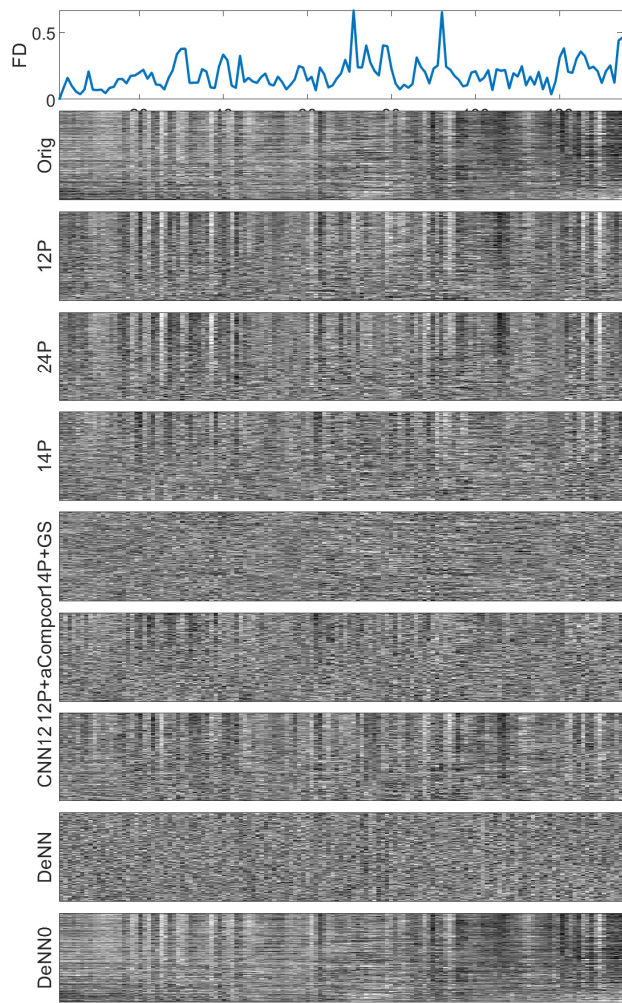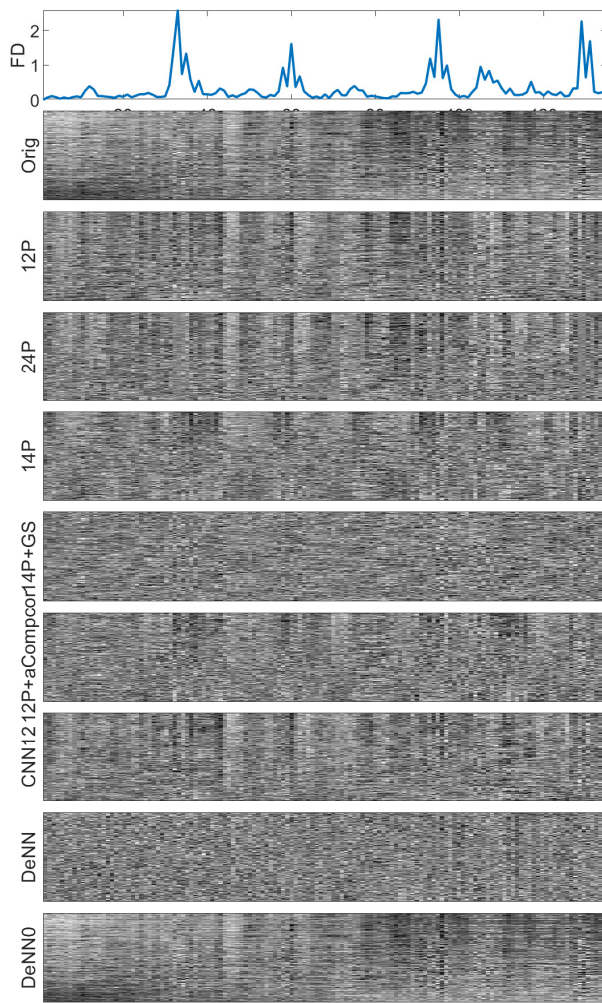

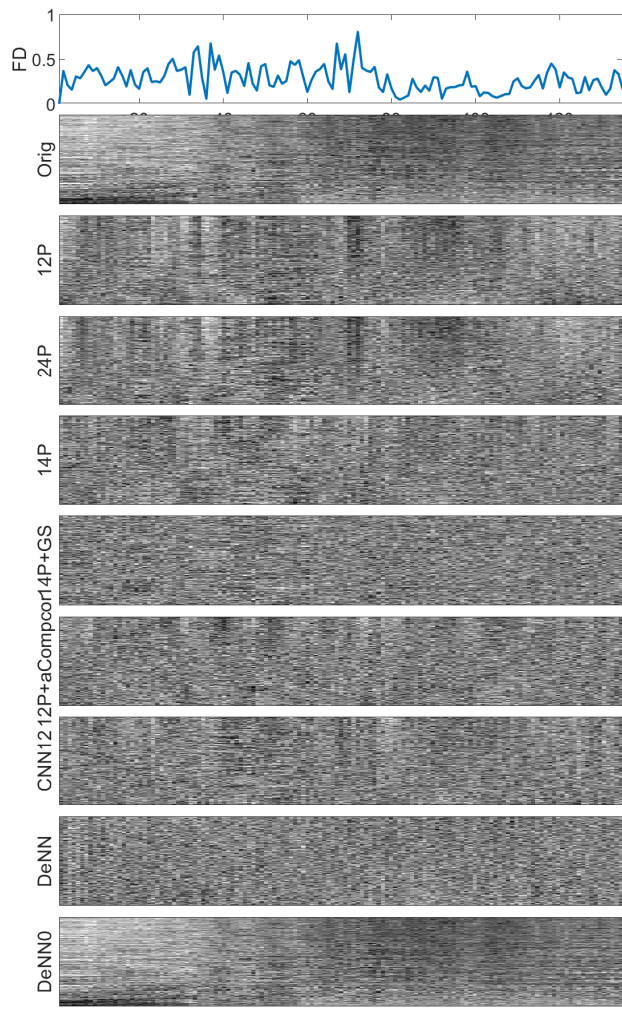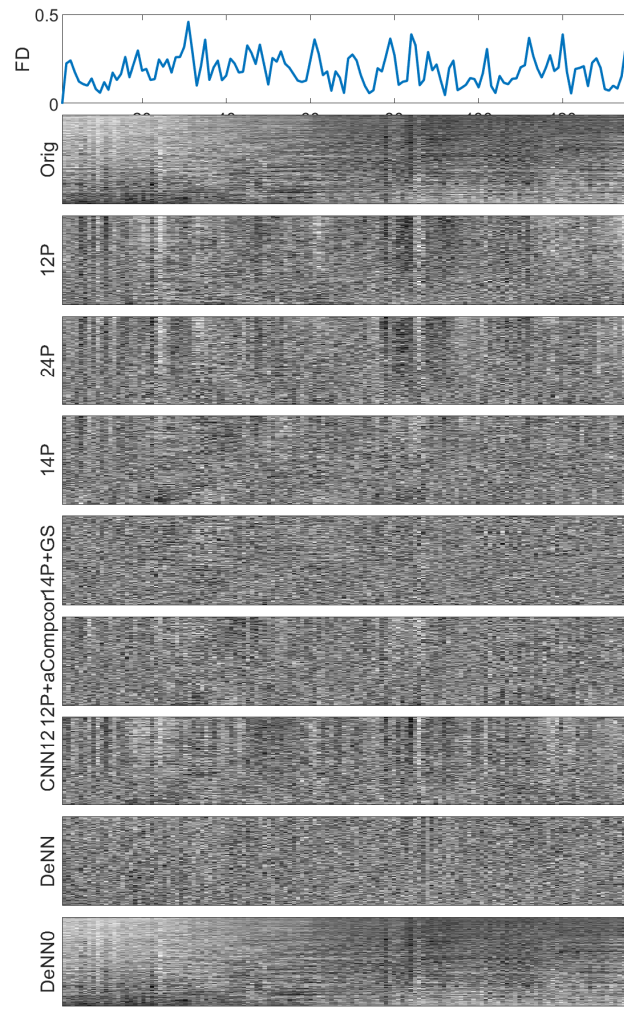



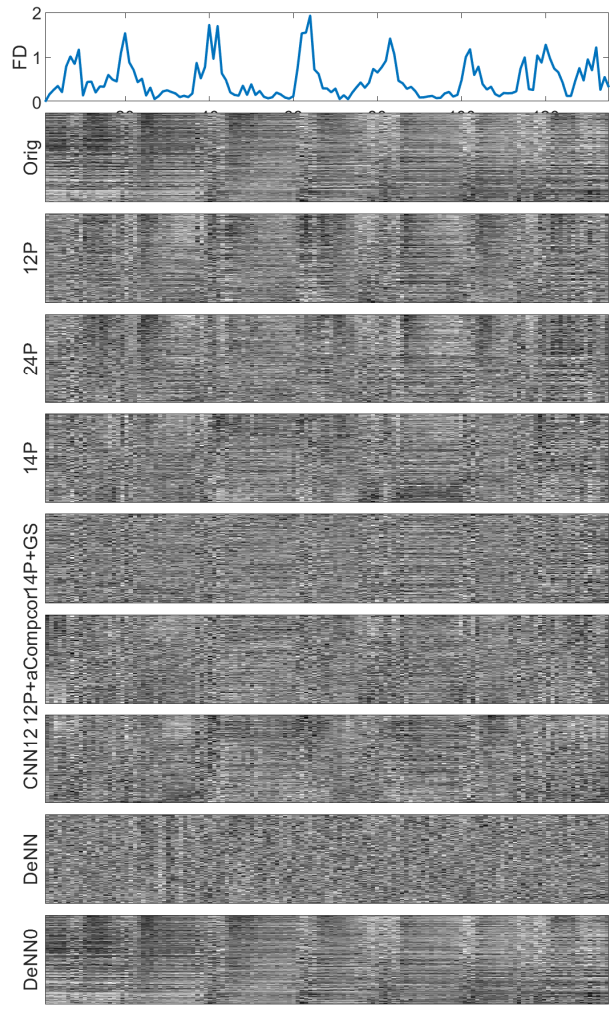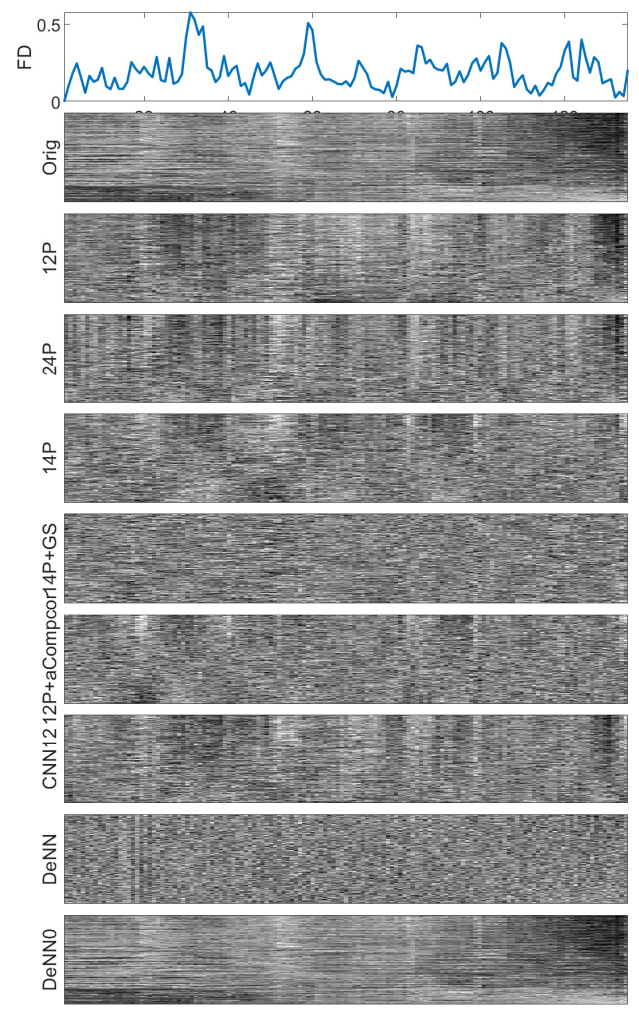

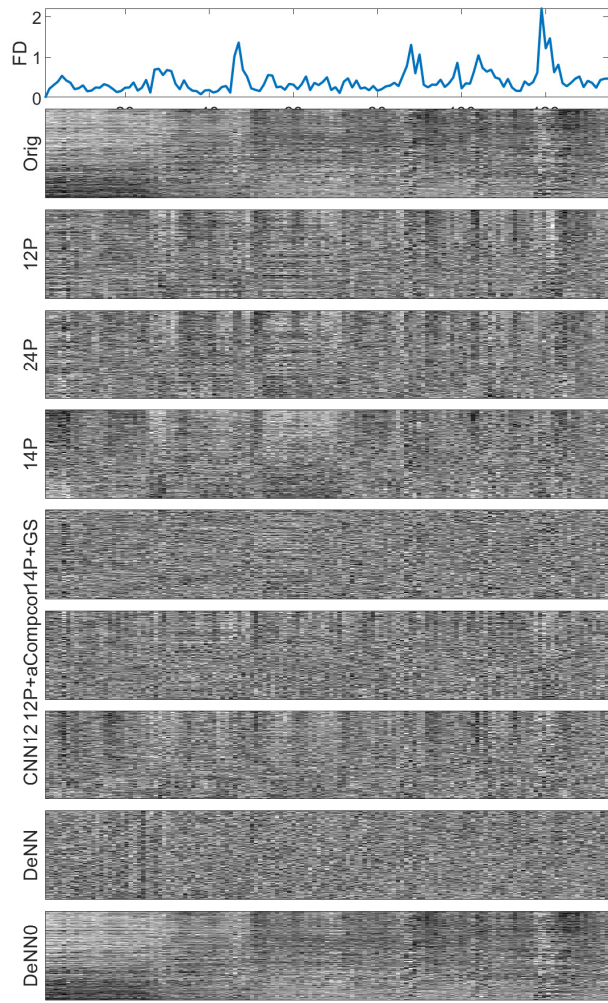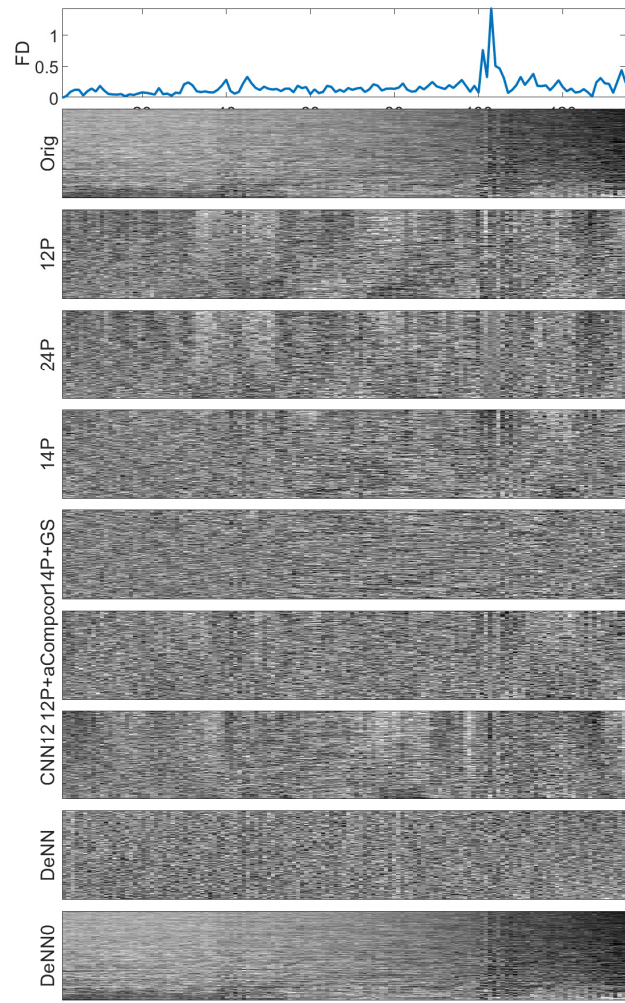

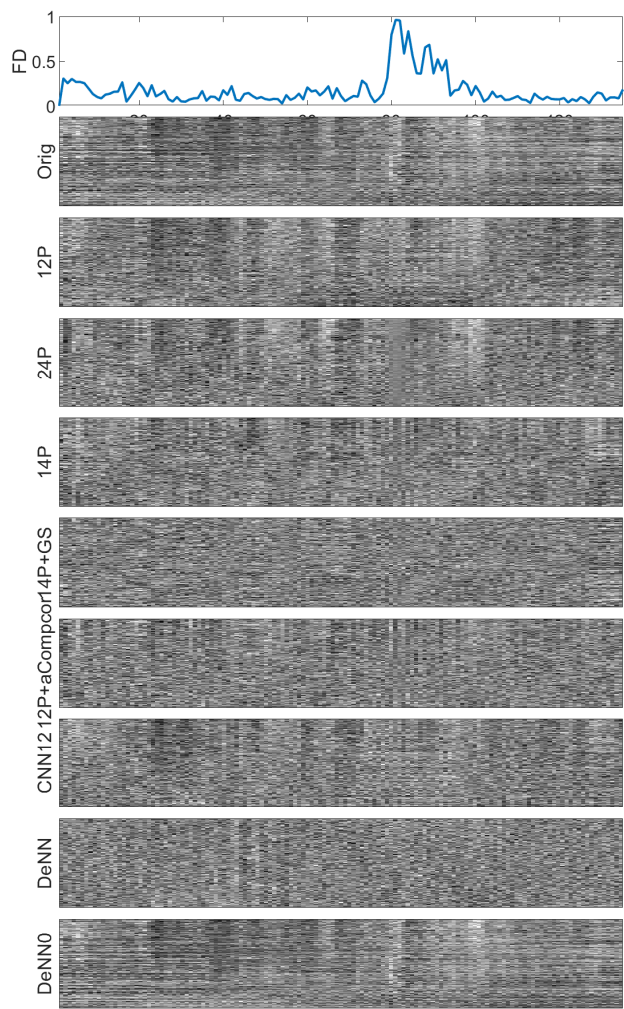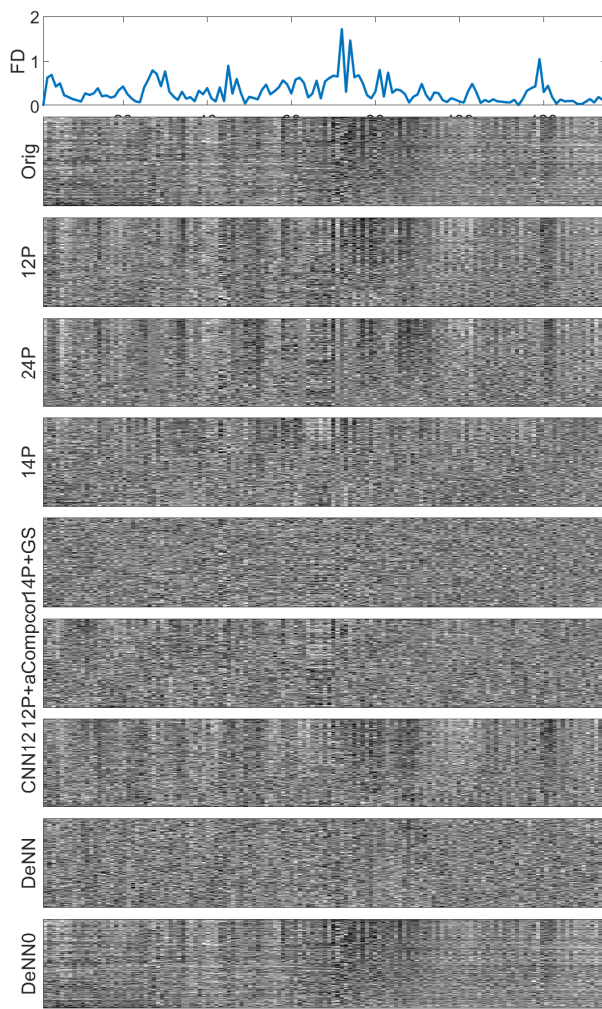



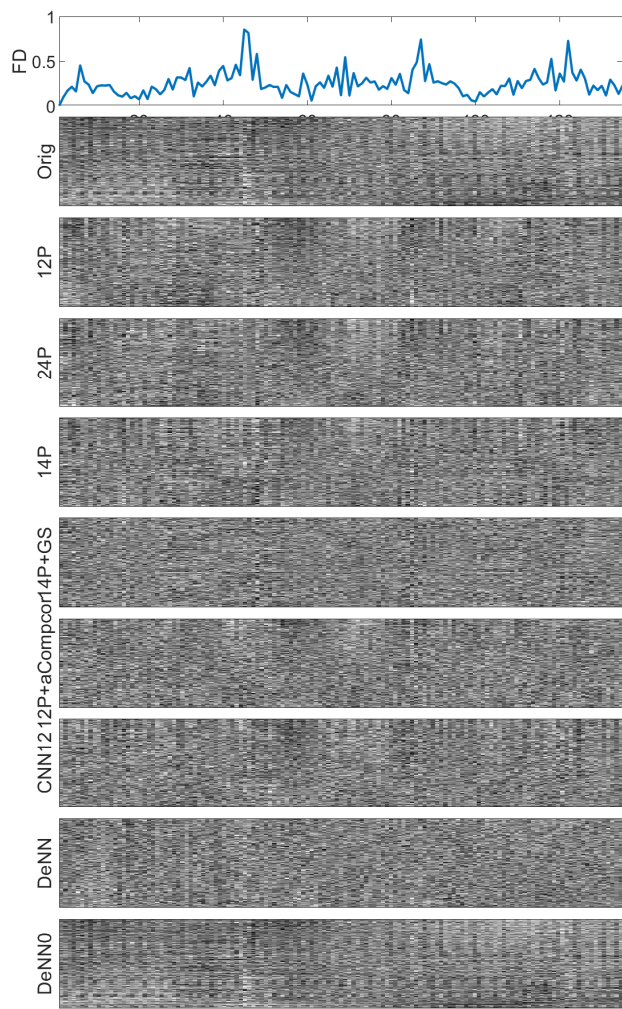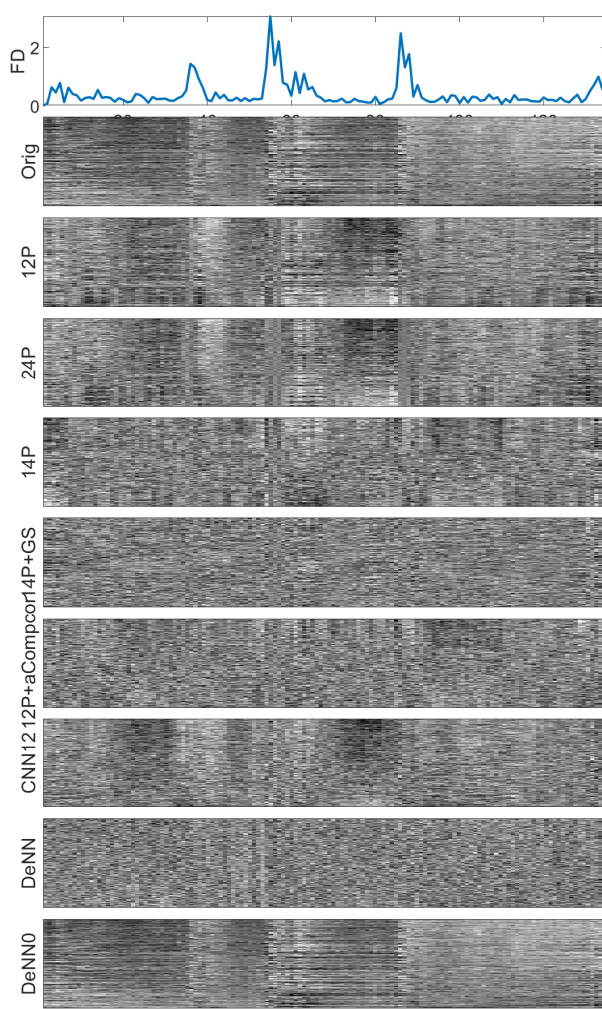

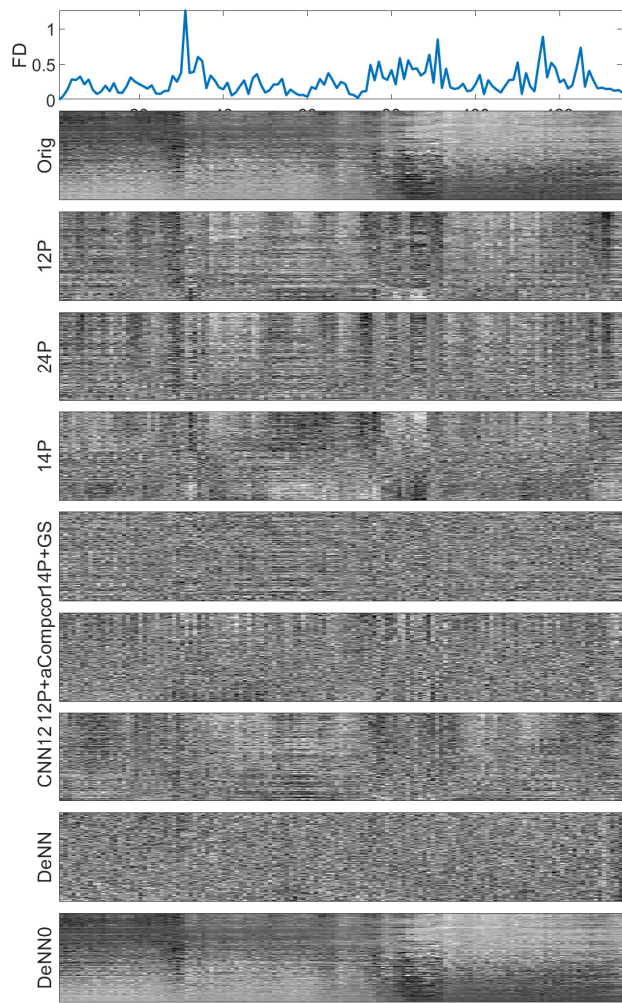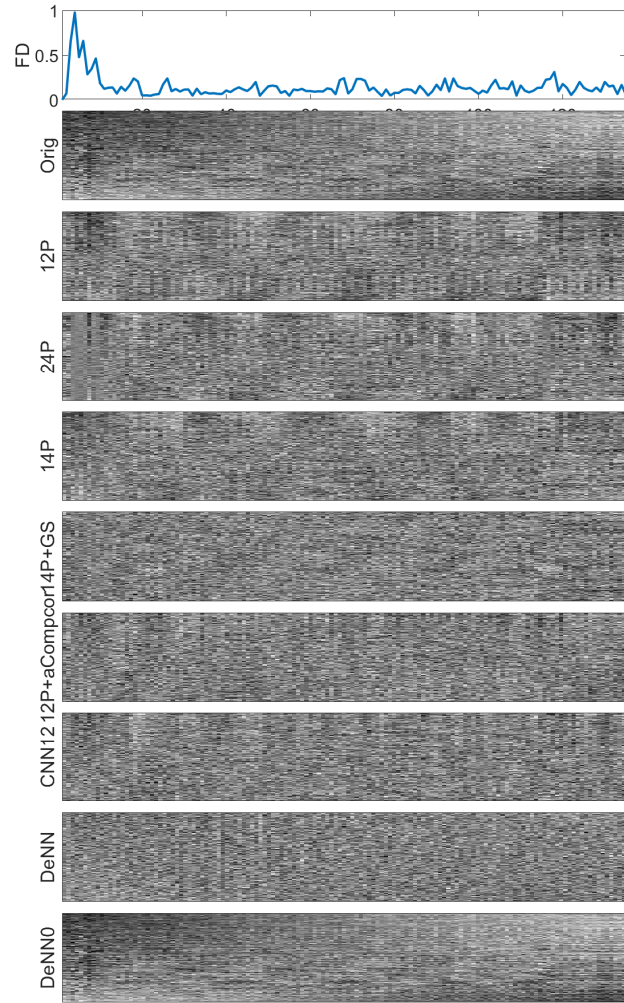

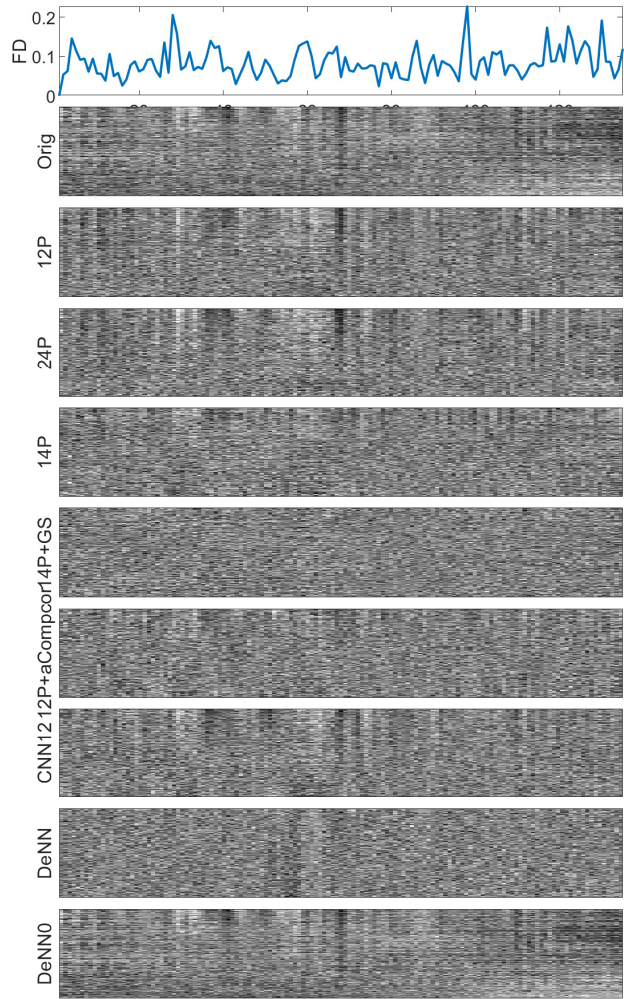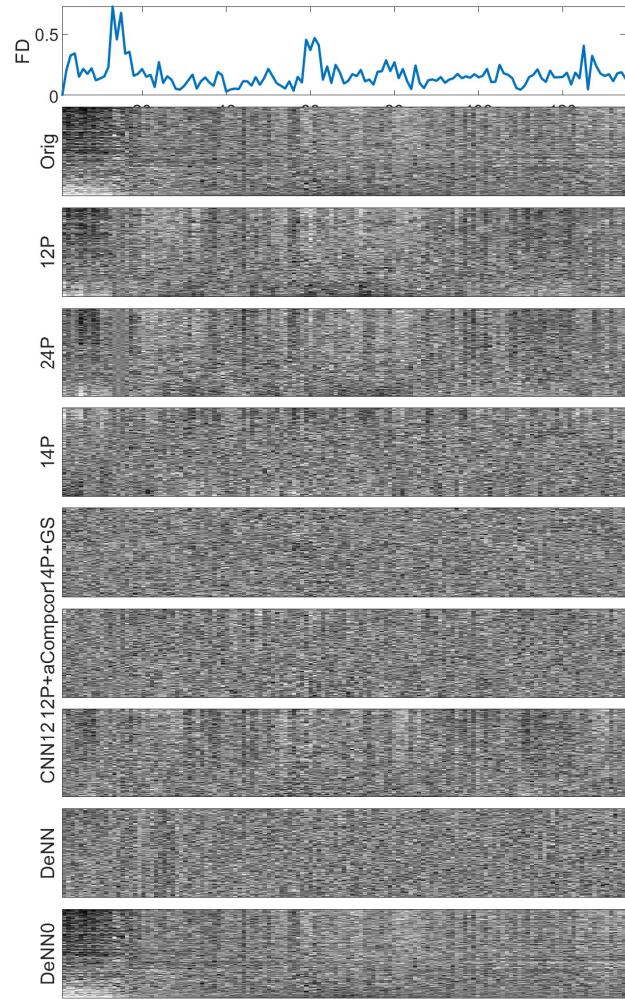



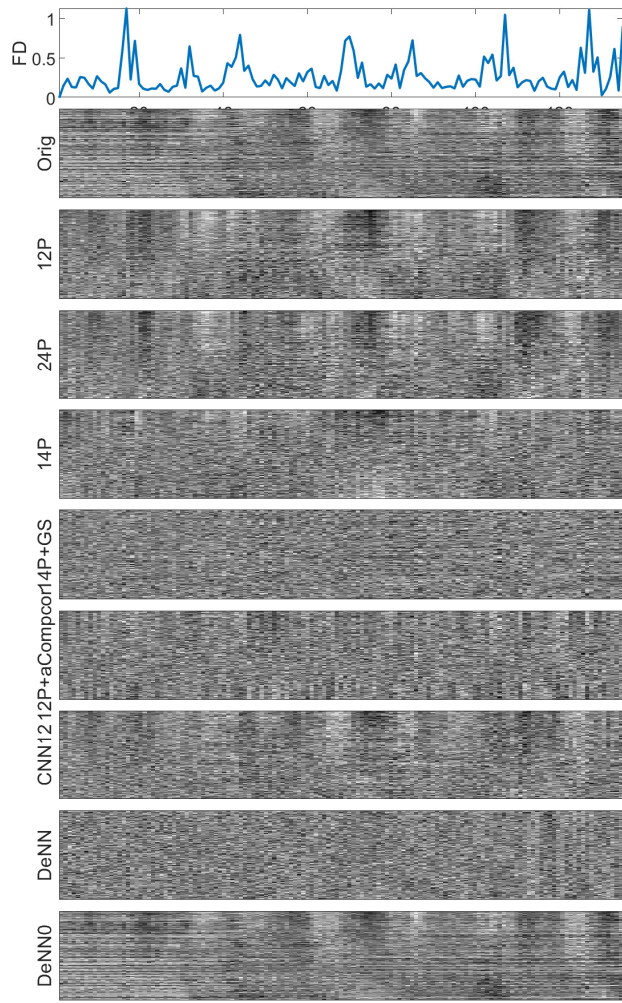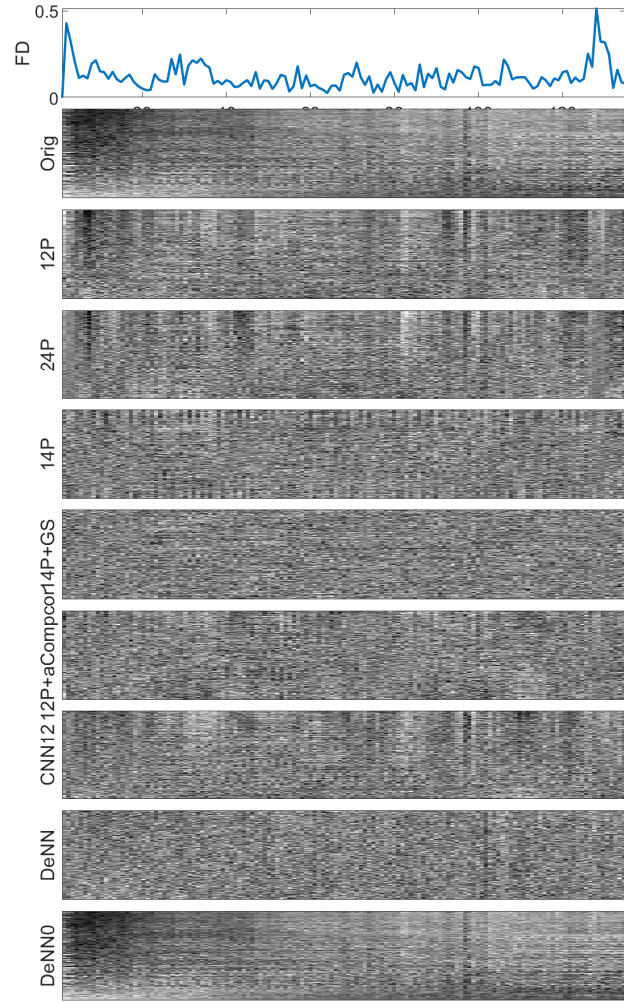

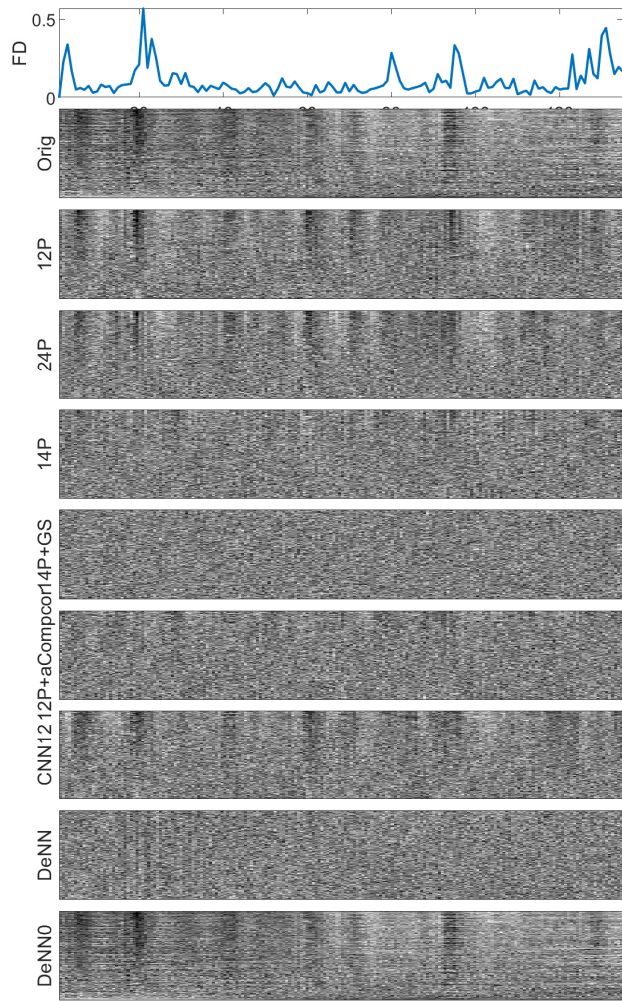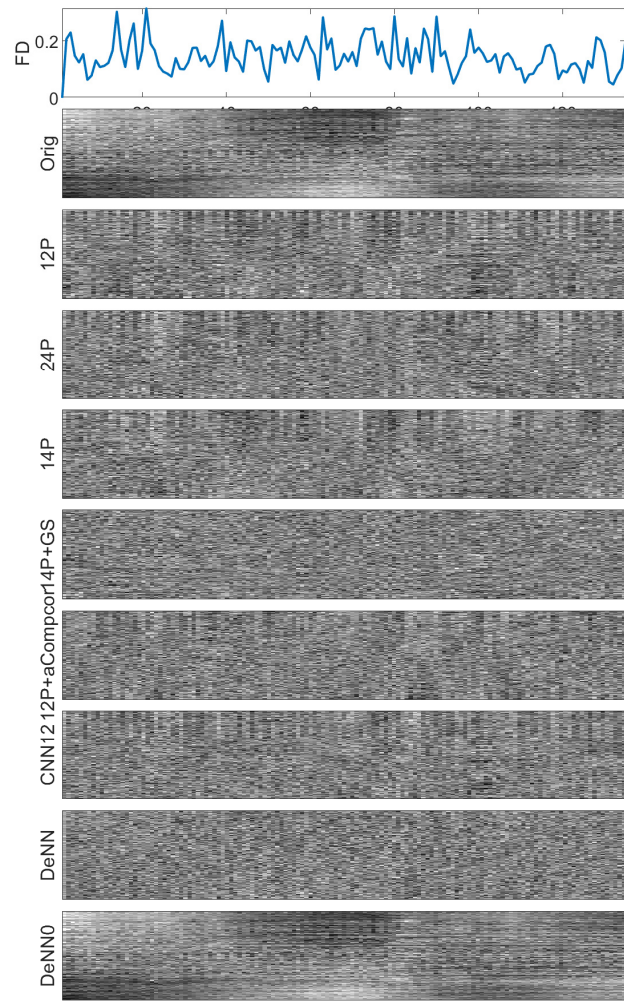

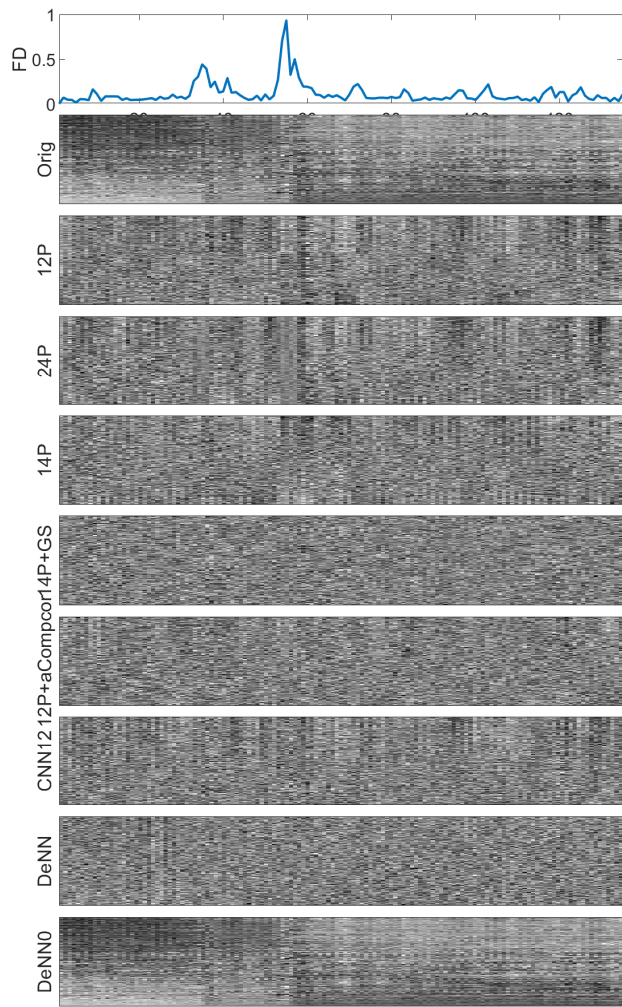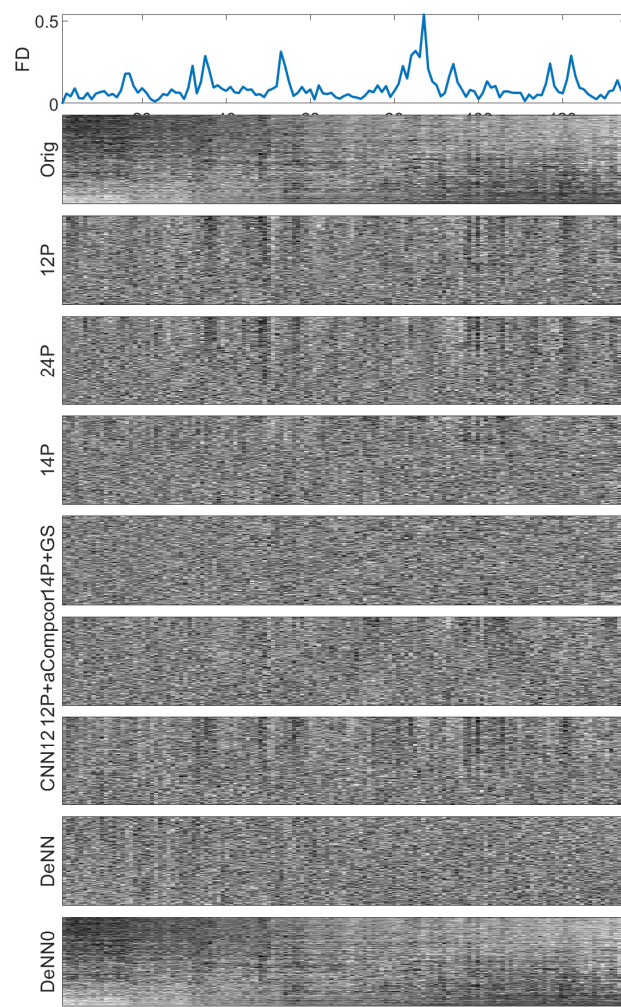



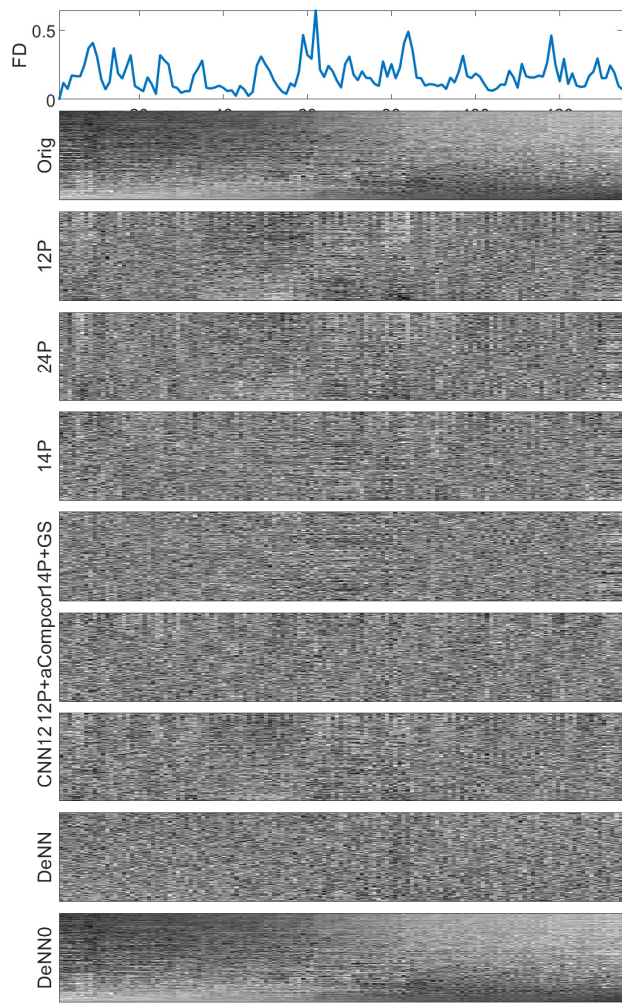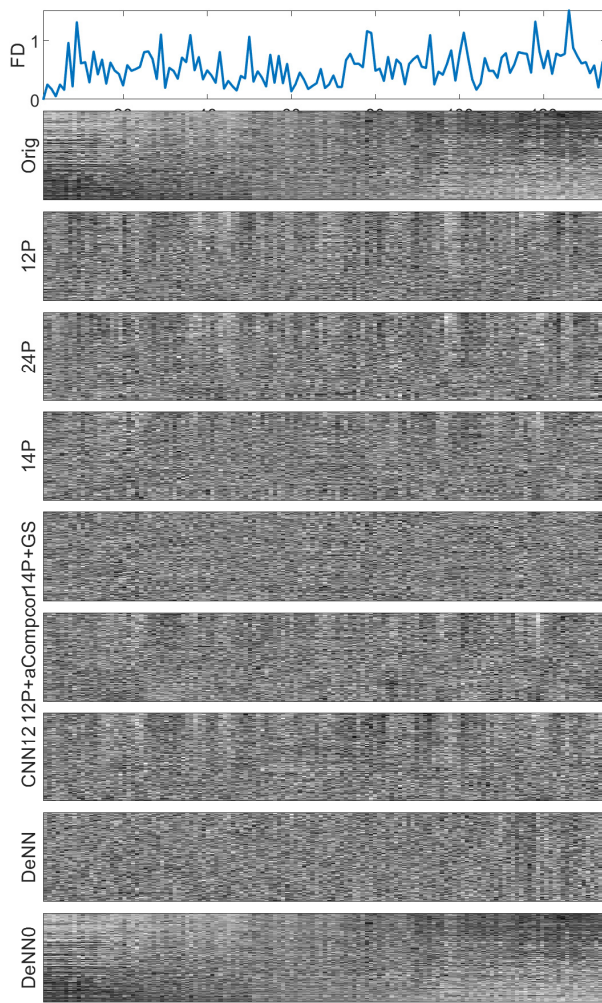

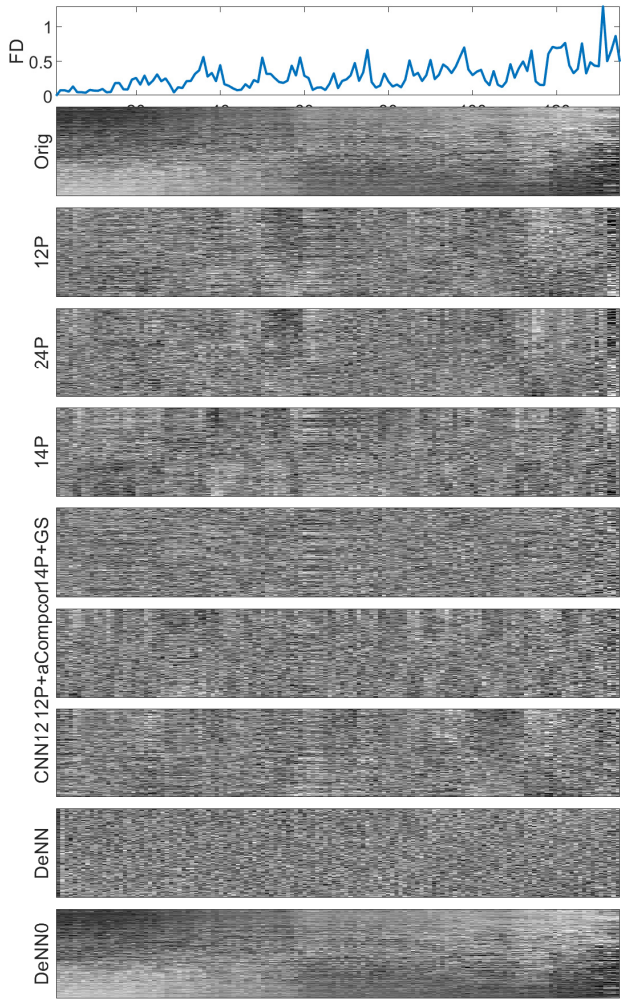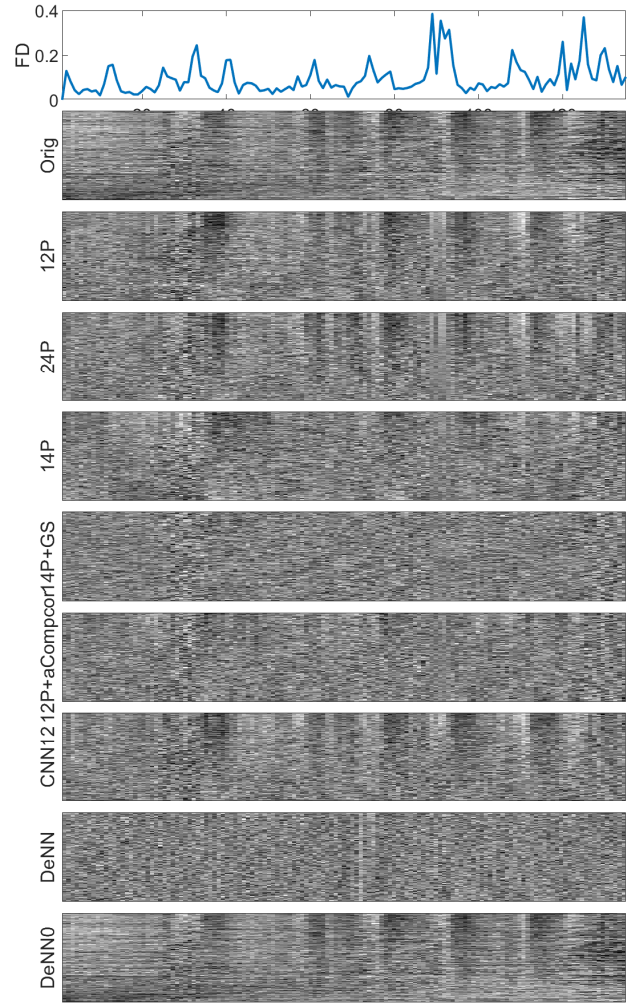

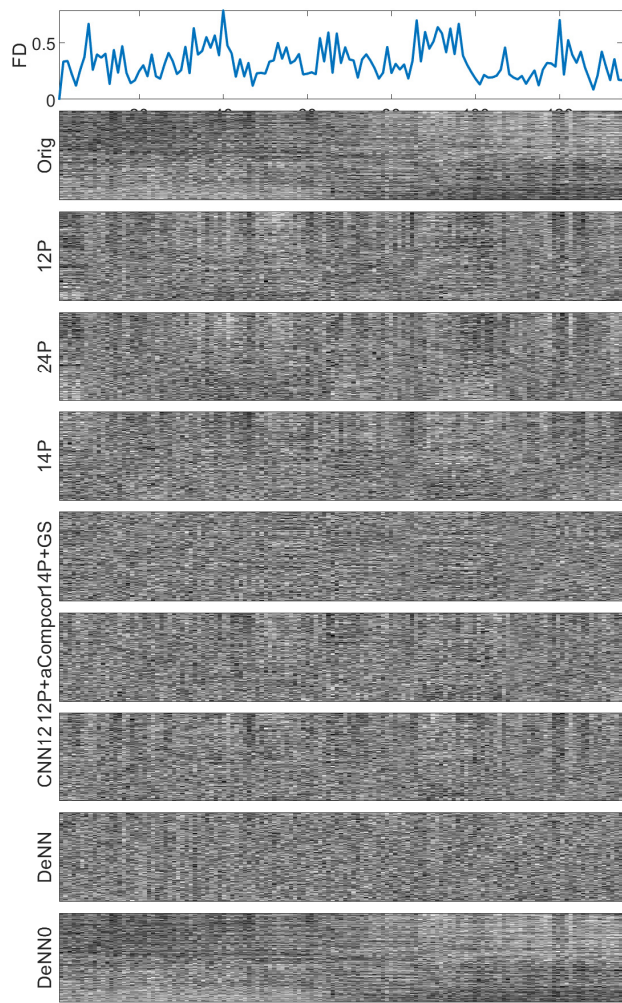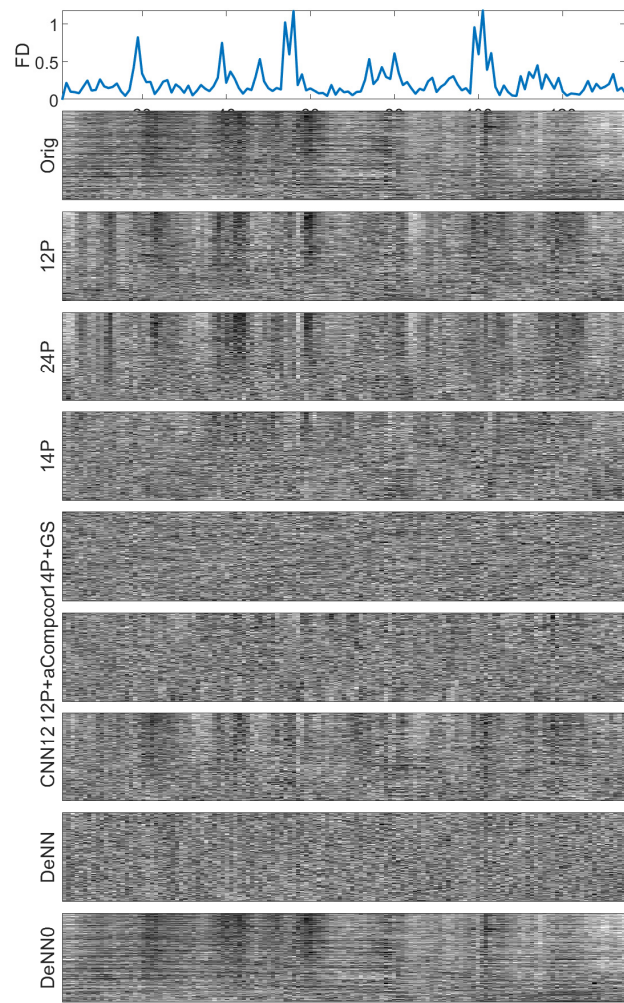



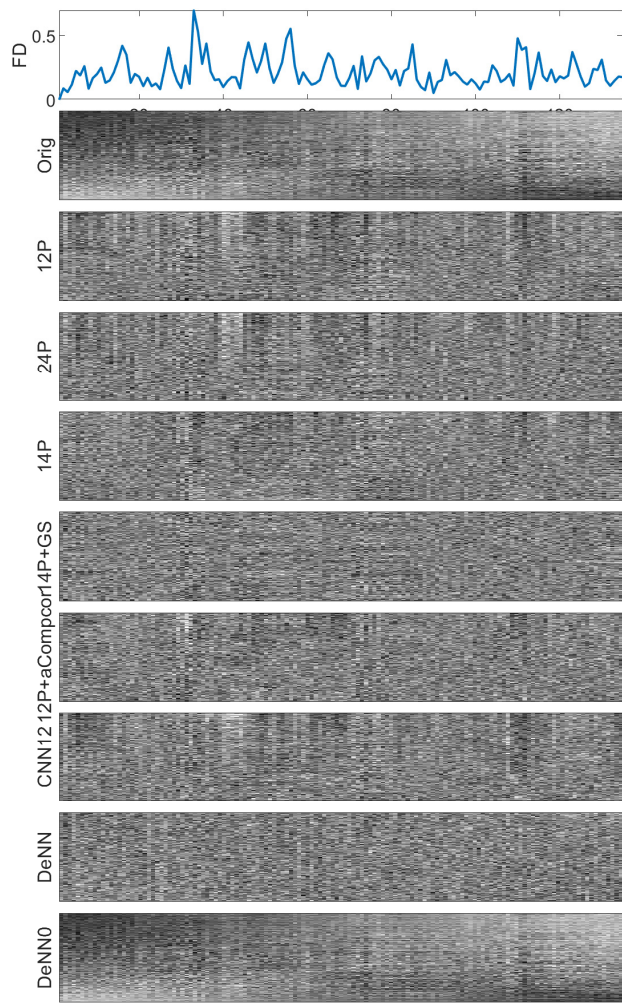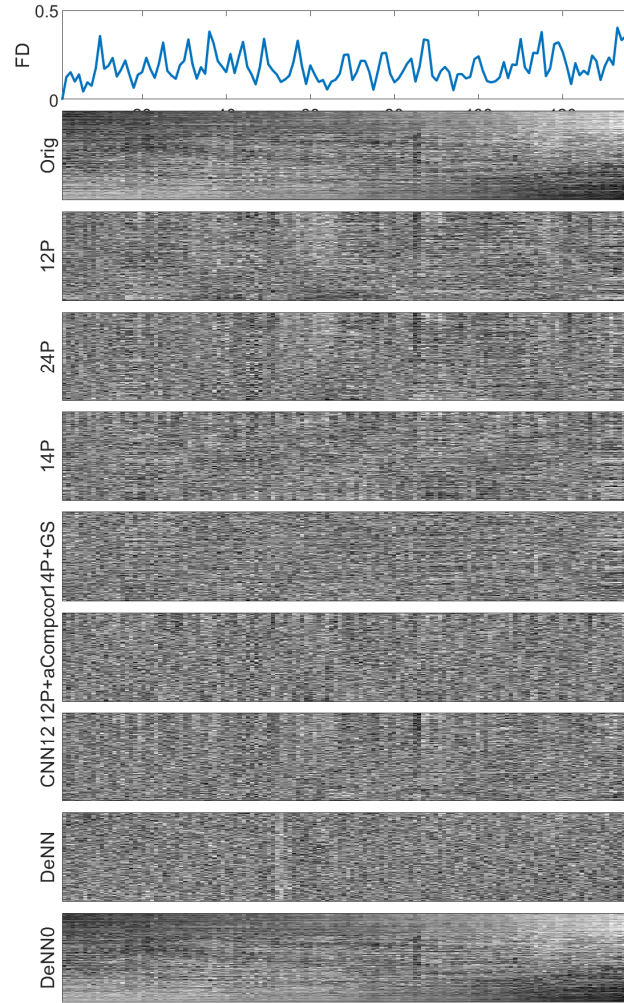

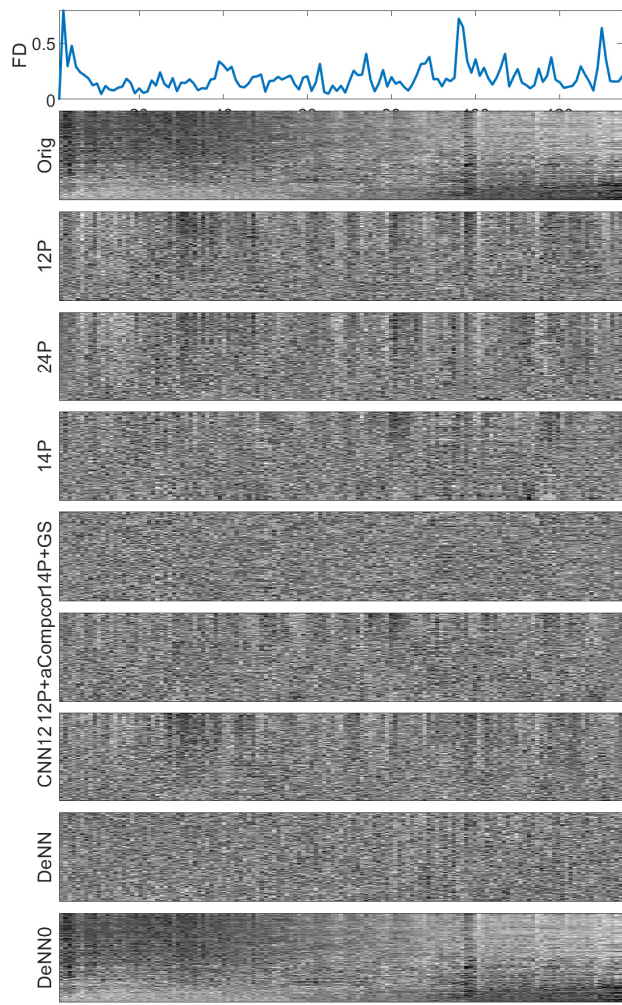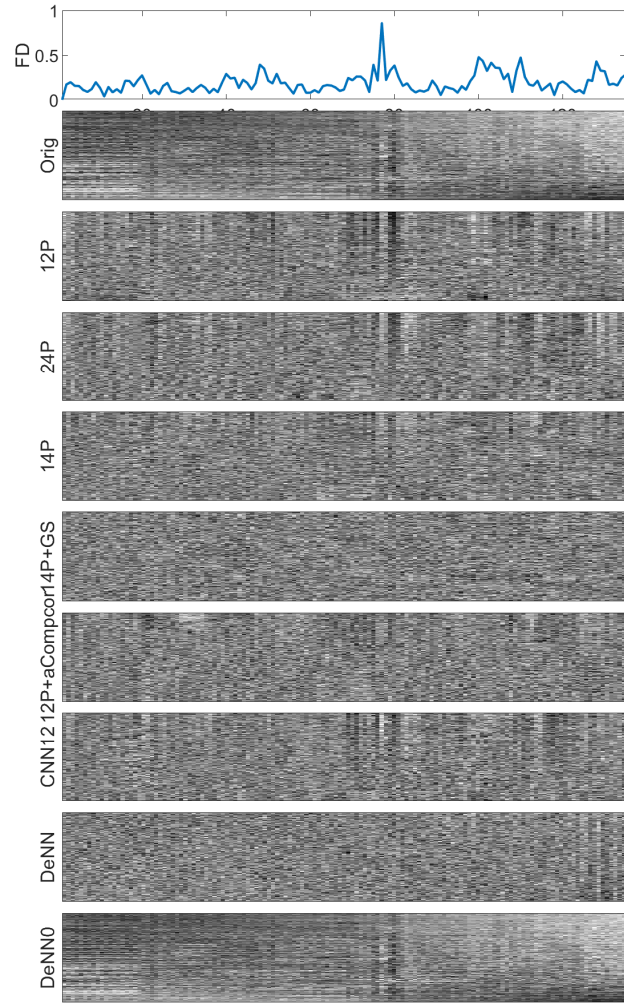

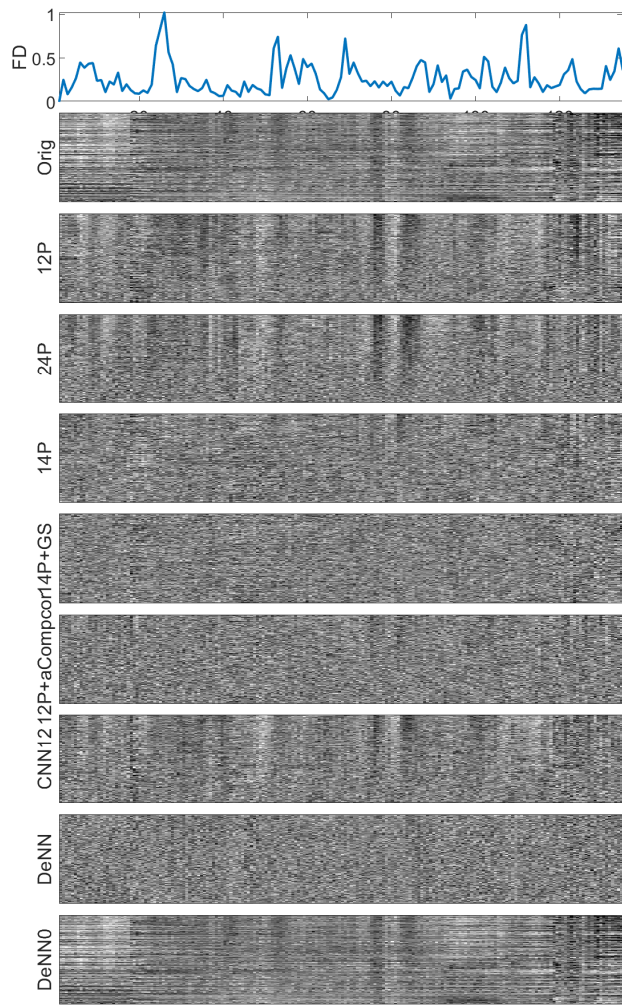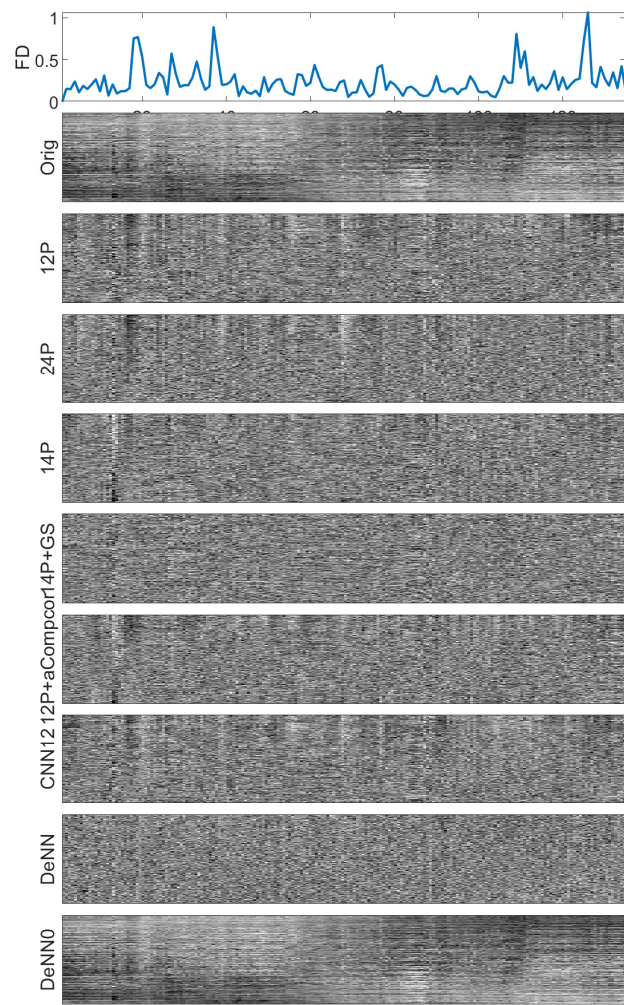



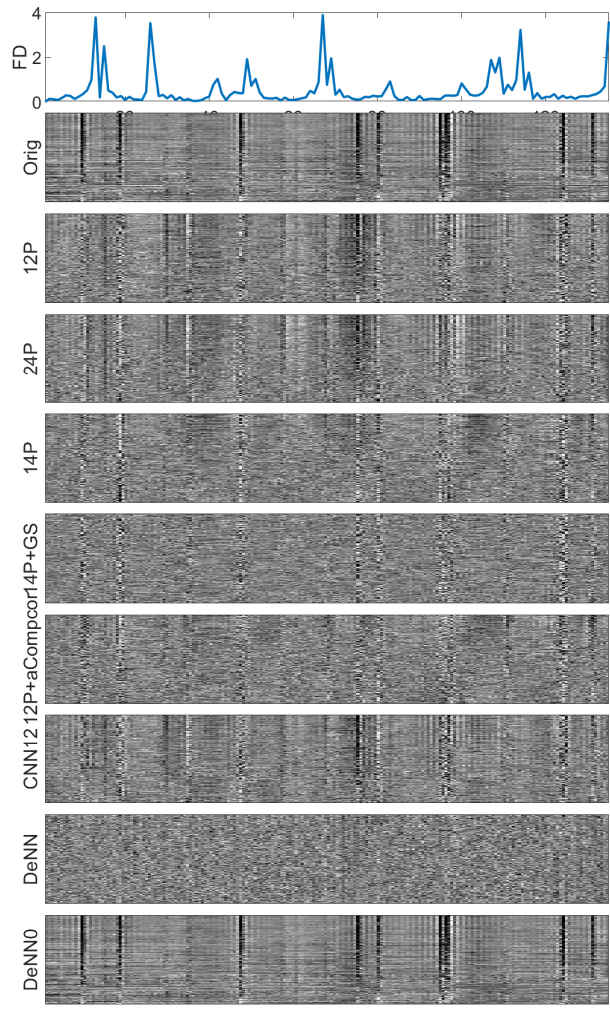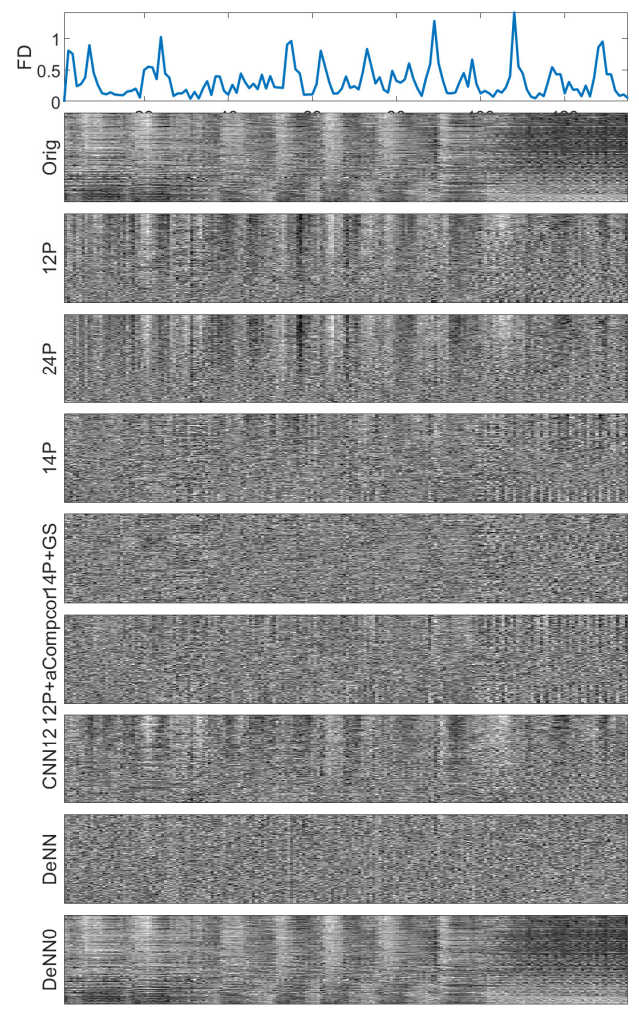

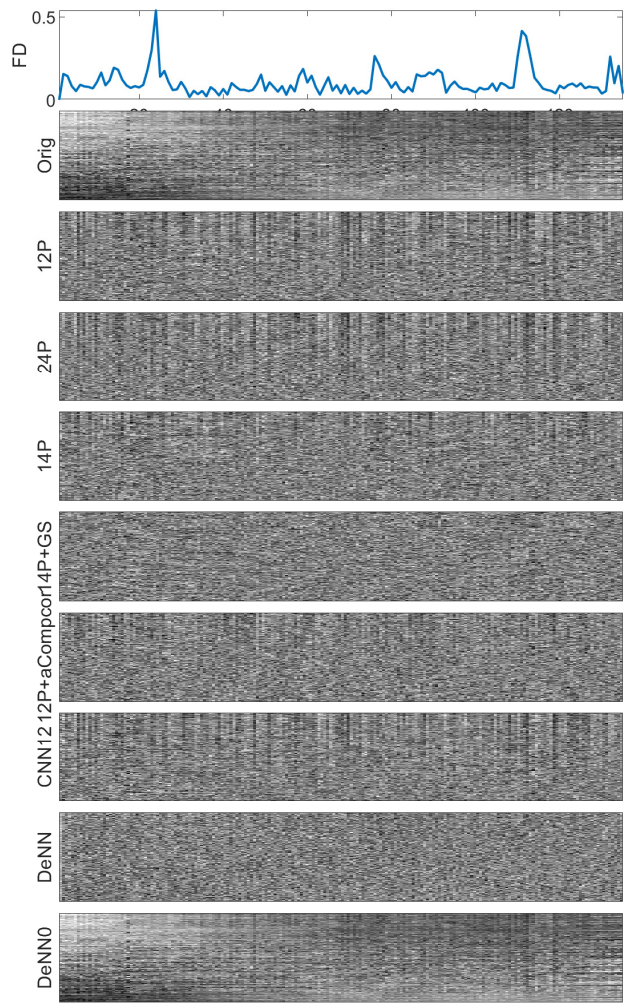

Supplement: NIHMS1657557-supplement-2.pdf [file NIHMS1657557-supplement-2.pdf]
